# Supplementary material
Source: Elsevier journal article supplement (https://rcastoragev2.blob.core.windows.net/1d080014b4bf386e3956bcc92ddb63be/mmc1.pdf)
Supplement: mmc1 [file mmc1.pdf]

### **Supplementary appendix**

This appendix formed part of the original submission and has been peer reviewed.  
We post it as supplied by the authors.

Supplement to: Abbasi-Kangevari M, Malekpour M-R, Masinaei M, et al. Effect of air pollution on disease burden, mortality, and life expectancy in North Africa and the Middle East: a systematic analysis for the Global Burden of Disease Study 2019. *Lancet Planet Health* 2023; **7**: e358–69.

**Supplementary appendix for “Air pollution impact on disease burden, mortality, and life expectancy in the North Africa and Middle East: A systematic analysis for the Global Burden of Disease Study 2019”**

|                                                                                                                                                                                                                                               |    |
|-----------------------------------------------------------------------------------------------------------------------------------------------------------------------------------------------------------------------------------------------|----|
| <b>Supplementary Table 1.</b> Data sources of GBD study 2019 for air pollution in North Africa and Middle East .....                                                                                                                          | 3  |
| <b>Supplementary Table 2.</b> Age-standardised death and DALYs rates per 100 000 attributable to air pollution among countries in North Africa and Middle East in 1990 and 2019 .....                                                         | 4  |
| <b>Supplementary Table 3.</b> All-ages deaths attributable to air pollution and its sub-types among countries in North Africa and Middle East in 2019 .....                                                                                   | 5  |
| <b>Supplementary Table 4.</b> Age-standardised death rates per 100 000 attributable to air pollution and its sub-types among countries in North Africa and Middle East in 2019 .....                                                          | 6  |
| <b>Supplementary Table 5.</b> The proportion of deaths attributable to air pollution in both sexes by age-groups in North Africa and Middle East in 1990 and 2019 .....                                                                       | 7  |
| <b>Supplementary Table 6.</b> All-ages DALYs attributable to air pollution and its sub-types among countries in North Africa and Middle East in 2019 .....                                                                                    | 8  |
| <b>Supplementary Table 7.</b> The proportion of DALYs attributable to air pollution in both sexes by age-groups in North Africa and Middle East in 1990 and 2019 .....                                                                        | 9  |
| <b>Supplementary Table 8.</b> Age-standardised DALYs rates per 100 000 attributable to air pollution and its sub-types among countries in North Africa and Middle East in 2019 .....                                                          | 10 |
| <b>Supplementary Table 9.</b> Exposure to air pollution among countries in North Africa and Middle East in the 1990-2019 and 2010-2019 periods .....                                                                                          | 11 |
| <b>Supplementary Table 10.</b> Death rates per 100 000 attributable to air pollution and its sub-types among age-groups in countries of North Africa and Middle East in 2019 .....                                                            | 12 |
| <b>Supplementary Table 11.</b> The number of deaths attributable to air pollution and its sub-types by age-groups among countries in North Africa and Middle East in 2019 .....                                                               | 13 |
| <b>Supplementary Table 12.</b> DALYs rates per 100 000 attributable to air pollution and its sub-types among age-groups in countries of North Africa and Middle East in 2019 .....                                                            | 14 |
| <b>Supplementary Table 13.</b> The number of DALYs attributable to air pollution and its sub-types by age-groups among countries in North Africa and Middle East in 2019 .....                                                                | 15 |
| <b>Supplementary Figure 1.</b> Age-standardised death and DALYs rates per 100 000 attributable to air pollution among women (a), men (b), and both sexes (c) in countries of North Africa and Middle East in 1990 and 2019 .....              | 16 |
| <b>Supplementary Figure 2.</b> Changes in life expectancy by age in North Africa and Middle East in 2019 if air pollution had been lowered to the theoretical minimum risk exposure levels among women (a), men (b), and both sexes (c) ..... | 19 |

|                                                                                                                                                                                                                             |    |
|-----------------------------------------------------------------------------------------------------------------------------------------------------------------------------------------------------------------------------|----|
| <b>Supplementary Figure 3.</b> Changes in life expectancy by age in North Africa and Middle East in 2019 if PM pollution had been lowered to the theoretical minimum risk exposure levels .....                             | 22 |
| <b>Supplementary Figure 4.</b> Changes in life expectancy by age in North Africa and Middle East in 2019 if household air pollution from solid fuels had been lowered to the theoretical minimum risk exposure levels ..... | 23 |
| <b>Supplementary Figure 5.</b> Changes in life expectancy by age in North Africa and Middle East in 2019 if ambient PM pollution had been lowered to the theoretical minimum risk exposure levels .....                     | 24 |

# Supplementary Table 1. Data sources of GBD study 2019 for air pollution in North Africa and Middle East

| N   | Citation                                                                                                                                                                                                                                                                                                                                                                                                       |
|-----|----------------------------------------------------------------------------------------------------------------------------------------------------------------------------------------------------------------------------------------------------------------------------------------------------------------------------------------------------------------------------------------------------------------|
| 1   | National Office of Statistics (Algeria), League of Arab States. Algeria Maternal and Child Health Survey 1992                                                                                                                                                                                                                                                                                                  |
| 2   | Algeria Multiple Indicator Cluster Survey 2006 as it appears in World Health Organization (WHO), WHO Household Energy Database 1974-2008. Geneva, Switzerland: World Health Organization (WHO), 2010                                                                                                                                                                                                           |
| 3   | Ministry of Health and Population (Algeria), United Nations Children's Fund (UNICEF), Algeria Multiple Indicator Cluster Survey 2012-2013. New York, United States of America: United Nations Children's Fund (UNICEF), 2018                                                                                                                                                                                   |
| 4   | Shaddick G, Thomas ML. Particulate Matter 2.5 and 10 Surface Monitor Station Expanded Database 2008-2017. [Unpublished]                                                                                                                                                                                                                                                                                        |
| 5   | Bahrain - Manama AirNow Air Quality Data 2017 as it appears in Shaddick G, Thomas ML. Particulate Matter 2.5 and 10 Surface Monitor Station Expanded Database 2008-2017. [Unpublished]                                                                                                                                                                                                                         |
| 6   | Egypt Annual Air Quality Report 2013 as it appears in Shaddick G, Thomas ML. Particulate Matter 2.5 and 10 Surface Monitor Station Expanded Database 2008-2017. [Unpublished]                                                                                                                                                                                                                                  |
| 7   | Central Agency for Public Mobilization and Statistics (CAPMAS) (Egypt), League of Arab States. Egypt Maternal and Child Health Survey 1991                                                                                                                                                                                                                                                                     |
| 8   | Macro International, Inc, Population Council (Egypt), Egypt Demographic and Health Survey 2000. Fairfax, United States of America: ICF International                                                                                                                                                                                                                                                           |
| 9   | El-Zanaty and Associates, Macro International, Inc, Ministry of Health and Population (Egypt), Population Council (Egypt), Egypt Demographic and Health Survey 2005. Fairfax, United States of America: ICF International                                                                                                                                                                                      |
| 10  | El-Zanaty and Associates, Macro International, Inc, Ministry of Health and Population (Egypt), Population Council (Egypt), Egypt Interim Demographic and Health Survey 2003. Fairfax, United States of America: ICF International                                                                                                                                                                              |
| 11  | Central Agency for Public Mobilization and Statistics (CAPMAS) (Egypt), Minnesota Population Center, University of Minnesota. Egypt Population, Housing, and Establishment Census 1996 - IPUMS. Minneapolis, United States of America: University of Minnesota                                                                                                                                                 |
| 12  | Central Agency for Public Mobilization and Statistics (CAPMAS) (Egypt), Minnesota Population Center, University of Minnesota. Egypt General Census for Population, Housing, and Establishments 2006 - IPUMS. Minneapolis, United States of America: University of Minnesota, 2011                                                                                                                              |
| 13  | Gholampour A, Nabizadeh R, Naseri S, Yunesian M, Taghipour H, Rastkari N, Nazmavari S, Faridi S, Mahvi Amir H. Exposure and health impacts of outdoor particulate matter in two urban and industrialized area of Tabriz, Iran. J Environ Health Sci Eng. 2014; 12: 27 as it appears in Shaddick G, Thomas ML. Particulate Matter 2.5 and 10 Surface Monitor Station Expanded Database 2008-2017. [Unpublished] |
| 14  | Mohammadyan M, Shabankhani B. Indoor PM 1, PM 2.5, PM 10, and outdoor PM 2.5 concentrations in primary schools in Sari, Iran. Arh Hig Rada Toksikol. 2013; 64(3): 371-7 as it appears in Shaddick G, Thomas ML. Particulate Matter 2.5 and 10 Surface Monitor Station Expanded Database 2008-2017. [Unpublished]                                                                                               |
| 15  | The Battle Against Solid UPF-emissions from Internal Combustion Engines Without Waiting for Euro VI as it appears in Shaddick G, Thomas ML. Particulate Matter 2.5 and 10 Surface Monitor Station Expanded Database 2008-2017. [Unpublished]                                                                                                                                                                   |
| 16  | Iran - Tehran Air Quality Control Company Particulate Matter Data 2013 as it appears in Shaddick G, Thomas ML. Particulate Matter 2.5 and 10 Surface Monitor Station Expanded Database 2008-2017. [Unpublished]                                                                                                                                                                                                |
| 17  | Iran - Tehran Air Quality Control Company Particulate Matter Data 2012 as it appears in Shaddick G, Thomas ML. Particulate Matter 2.5 and 10 Surface Monitor Station Expanded Database 2008-2017. [Unpublished]                                                                                                                                                                                                |
| 18  | Iran - Tehran Air Quality Control Company Particulate Matter Data 2010 as it appears in Shaddick G, Thomas ML. Particulate Matter 2.5 and 10 Surface Monitor Station Expanded Database 2008-2017. [Unpublished]                                                                                                                                                                                                |
| 19  | Iran - Tehran Air Quality Control Company Particulate Matter Data 2014 as it appears in Shaddick G, Thomas ML. Particulate Matter 2.5 and 10 Surface Monitor Station Expanded Database 2008-2017. [Unpublished]                                                                                                                                                                                                |
| 20  | Iran - Tehran Air Quality Control Company Particulate Matter Data 2015 as it appears in Shaddick G, Thomas ML. Particulate Matter 2.5 and 10 Surface Monitor Station Expanded Database 2008-2017. [Unpublished]                                                                                                                                                                                                |
| 21  | Iran - Tehran Air Quality Control Company Particulate Matter Data 2016 as it appears in Shaddick G, Thomas ML. Particulate Matter 2.5 and 10 Surface Monitor Station Expanded Database 2008-2017. [Unpublished]                                                                                                                                                                                                |
| 22  | Iran Air Quality Monitoring System Particulate Matter Data 2010 as it appears in Shaddick G, Thomas ML. Particulate Matter 2.5 and 10 Surface Monitor Station Expanded Database 2008-2017. [Unpublished]                                                                                                                                                                                                       |
| 23  | Iran Air Quality Monitoring System Particulate Matter Data 2012 as it appears in Shaddick G, Thomas ML. Particulate Matter 2.5 and 10 Surface Monitor Station Expanded Database 2008-2017. [Unpublished]                                                                                                                                                                                                       |
| 24  | Iran Air Quality Monitoring System Particulate Matter Data 2013 as it appears in Shaddick G, Thomas ML. Particulate Matter 2.5 and 10 Surface Monitor Station Expanded Database 2008-2017. [Unpublished]                                                                                                                                                                                                       |
| 25  | Iran Air Quality Monitoring System Particulate Matter Data 2014 as it appears in Shaddick G, Thomas ML. Particulate Matter 2.5 and 10 Surface Monitor Station Expanded Database 2008-2017. [Unpublished]                                                                                                                                                                                                       |
| 26  | Statistical Centre of Iran. Risk factors for severe pneumonia in children in Basrah, Iraq. Trop Doct. 2001; 139-41                                                                                                                                                                                                                                                                                             |
| 27  | Hassan MK, Al-Sadoon I. Risk factors for severe pneumonia in children in Basrah, Iraq. Trop Doct. 2001; 139-41                                                                                                                                                                                                                                                                                                 |
| 28  | Iraq PM2.5 and PM10 Data 2015 as it appears in Shaddick G, Thomas ML. Particulate Matter 2.5 and 10 Surface Monitor Station Expanded Database 2008-2017. [Unpublished]                                                                                                                                                                                                                                         |
| 29  | Iraq PM2.5 and PM10 Data 2016 as it appears in Shaddick G, Thomas ML. Particulate Matter 2.5 and 10 Surface Monitor Station Expanded Database 2008-2017. [Unpublished]                                                                                                                                                                                                                                         |
| 30  | United Nations Children's Fund (UNICEF), Central Organization for Statistics and Information Technology (Iraq), Kurdistan Regional Statistics Office. Iraq Multiple Indicator Cluster Survey 2006. New York, United States: United Nations Children's Fund (UNICEF)                                                                                                                                            |
| 31  | Central Organization for Statistics and Information Technology (Iraq), The Fafo Research Foundation. Iraq Multiple Indicator Rapid Assessment 2004                                                                                                                                                                                                                                                             |
| 32  | Central Organization for Statistics and Information Technology (Iraq), Kurdistan Regional Statistics Office, World Bank. Iraq Household Socioeconomic Survey 2006-2007. Washington DC, United States of America: World Bank                                                                                                                                                                                    |
| 33  | Central Organization for Statistics and Information Technology (Iraq), Kurdistan Regional Statistics Office, Ministry of Health (Iraq), United Nations Children's Fund (UNICEF), Iraq Multiple Indicator Cluster Survey 2011. New York, United States of America: United Nations Children's Fund (UNICEF), 2013                                                                                                |
| 34  | Central Organization for Statistics and Information Technology (Iraq), Kurdistan Regional Statistics Office, World Bank. Iraq Household Socioeconomic Survey 2012-2013. Washington DC, United States of America: World Bank                                                                                                                                                                                    |
| 35  | Jordan Ground Station Particulate Matter Data 2015 as it appears in Shaddick G, Thomas ML. Particulate Matter 2.5 and 10 Surface Monitor Station Expanded Database 2008-2017. [Unpublished]                                                                                                                                                                                                                    |
| 36  | Jordan Ground Station Particulate Matter Data 2016 as it appears in Shaddick G, Thomas ML. Particulate Matter 2.5 and 10 Surface Monitor Station Expanded Database 2008-2017. [Unpublished]                                                                                                                                                                                                                    |
| 37  | Jordan Ground Station Particulate Matter Data 2017 as it appears in Shaddick G, Thomas ML. Particulate Matter 2.5 and 10 Surface Monitor Station Expanded Database 2008-2017. [Unpublished]                                                                                                                                                                                                                    |
| 38  | Department of Statistics (Jordan), Macro International, Inc. Jordan Demographic and Health Survey 2002. Fairfax, United States of America: ICF International                                                                                                                                                                                                                                                   |
| 39  | Department of Statistics (Jordan), Macro International, Inc. Jordan Demographic and Health Survey 2007. Fairfax, United States of America: ICF International                                                                                                                                                                                                                                                   |
| 40  | Department of Statistics (Jordan), ICF Macro. Jordan Interim Demographic and Health Survey 2009. Fairfax, United States of America: ICF International, 2010                                                                                                                                                                                                                                                    |
| 41  | Department of Statistics (Jordan), ICF International. Jordan Demographic and Health Survey 2012. Fairfax, United States of America: ICF International                                                                                                                                                                                                                                                          |
| 42  | Kuwait Ground Station Monitor Particulate Matter Data 2014 as it appears in Shaddick G, Thomas ML. Particulate Matter 2.5 and 10 Surface Monitor Station Expanded Database 2008-2017. [Unpublished]                                                                                                                                                                                                            |
| 43  | Kuwait Environmental Monitoring Information System Air Quality Data 2015 as it appears in Shaddick G, Thomas ML. Particulate Matter 2.5 and 10 Surface Monitor Station Expanded Database 2008-2017. [Unpublished]                                                                                                                                                                                              |
| 44  | Kuwait Environmental Monitoring Information System Air Quality Data 2016 as it appears in Shaddick G, Thomas ML. Particulate Matter 2.5 and 10 Surface Monitor Station Expanded Database 2008-2017. [Unpublished]                                                                                                                                                                                              |
| 45  | Kuwait - Kuwait City AirNow Air Quality Data 2017 as it appears in Shaddick G, Thomas ML. Particulate Matter 2.5 and 10 Surface Monitor Station Expanded Database 2008-2017. [Unpublished]                                                                                                                                                                                                                     |
| 46  | Lebanon National Air Quality Monitoring Network PM2.5 Data 2014 as it appears in Shaddick G, Thomas ML. Particulate Matter 2.5 and 10 Surface Monitor Station Expanded Database 2008-2017. [Unpublished]                                                                                                                                                                                                       |
| 47  | Ministry of Public Health (Lebanon), League of Arab States. Lebanon Maternal and Child Health Survey 1996                                                                                                                                                                                                                                                                                                      |
| 48  | Lebanon National Survey of Household Living Conditions 2004                                                                                                                                                                                                                                                                                                                                                    |
| 49  | Committee for Health and Social Insurance (Libya), League of Arab States. Libya Maternal and Child Health Survey 1995                                                                                                                                                                                                                                                                                          |
| 50  | Sasco AJ, Merrill RM, Darl I, Benhaim-Luzon Y, Carriot F, Cann CJ, Bartal M. A case-control study of lung cancer in Casablanca, Morocco. Cancer Causes Control. 2002; 13(7): 609-16                                                                                                                                                                                                                            |
| 51  | Bouh HA, Benaych F, Bounakhla M, Noack Y, Tahri M, Zahry F. Seasonal variations of the atmospheric particles and its chemical components in Meknes City - Morocco. J Mater Environ. 2013; 4(1): 49-62 as it appears in Shaddick G, Thomas ML. Particulate Matter 2.5 and 10 Surface Monitor Station Expanded Database 2008-2017. [Unpublished]                                                                 |
| 52  | Morocco Ground Station Particulate Matter Data 2013 as it appears in Shaddick G, Thomas ML. Particulate Matter 2.5 and 10 Surface Monitor Station Expanded Database 2008-2017. [Unpublished]                                                                                                                                                                                                                   |
| 53  | Morocco Ground Station Particulate Matter Data 2011 as it appears in Shaddick G, Thomas ML. Particulate Matter 2.5 and 10 Surface Monitor Station Expanded Database 2008-2017. [Unpublished]                                                                                                                                                                                                                   |
| 54  | Morocco Ground Station Particulate Matter Data 2012 as it appears in Shaddick G, Thomas ML. Particulate Matter 2.5 and 10 Surface Monitor Station Expanded Database 2008-2017. [Unpublished]                                                                                                                                                                                                                   |
| 55  | Morocco PM2.5 and PM10 Data 2016 as it appears in Shaddick G, Thomas ML. Particulate Matter 2.5 and 10 Surface Monitor Station Expanded Database 2008-2017. [Unpublished]                                                                                                                                                                                                                                      |
| 56  | Ministry of Health (Morocco), League of Arab States. Morocco Maternal and Child Health Survey 1996-1997                                                                                                                                                                                                                                                                                                        |
| 57  | League of Arab States, Macro International, Inc, Ministry of Health (Morocco), Morocco Demographic and Health Survey 2003-2004. Fairfax, United States of America: ICF International                                                                                                                                                                                                                           |
| 58  | World Health Organization (WHO), Morocco World Health Survey 2003. Geneva, Switzerland: World Health Organization (WHO), 2005                                                                                                                                                                                                                                                                                  |
| 59  | High Commission for Planning (Morocco), World Bank. Morocco Household and Youth Survey 2009-2010                                                                                                                                                                                                                                                                                                               |
| 60  | Palestinian Central Bureau of Statistics, Minnesota Population Center. Palestine Population, Housing, and Establishment Census 1997 from the Integrated Public Use Microdata Series, International. [Machine-readable database]. Minneapolis: University of Minnesota                                                                                                                                          |
| 61  | Palestinian Central Bureau of Statistics, Minnesota Population Center. Palestine Population, Housing, and Establishment Census 2007 from the Integrated Public Use Microdata Series, International. [Machine-readable database]. Minneapolis: University of Minnesota, 2011                                                                                                                                    |
| 62  | Ministry of Health (Palestine), Palestinian Central Bureau of Statistics, United Nations Children's Fund (UNICEF), United Nations Population Fund (UNFPA), Palestine Multiple Indicator Cluster Survey 2010. New York, United States of America: United Nations Children's Fund (UNICEF), 2014                                                                                                                 |
| 63  | Palestinian Central Bureau of Statistics. Palestine Household Energy Survey, January 2005                                                                                                                                                                                                                                                                                                                      |
| 64  | Ministry of Health (Palestine), Palestinian Central Bureau of Statistics, United Nations Children's Fund (UNICEF). Palestine Multiple Indicator Cluster Survey 2014. New York, United States of America: United Nations Children's Fund (UNICEF), 2015                                                                                                                                                         |
| 65  | Oman Ground Station Monitor Particulate Matter Data 2009 as it appears in Shaddick G, Thomas ML. Particulate Matter 2.5 and 10 Surface Monitor Station Expanded Database 2008-2017. [Unpublished]                                                                                                                                                                                                              |
| 66  | Review of Environmental Exposures to Carcinogens in Qatar as it appears in Shaddick G, Thomas ML. Particulate Matter 2.5 and 10 Surface Monitor Station Expanded Database 2008-2017. [Unpublished]                                                                                                                                                                                                             |
| 67  | Qatar Ground Monitor Station Particulate Matter Data 2012 as it appears in Shaddick G, Thomas ML. Particulate Matter 2.5 and 10 Surface Monitor Station Expanded Database 2008-2017. [Unpublished]                                                                                                                                                                                                             |
| 68  | Qatar Statistics Authority. Qatar Population and Housing Census 2010                                                                                                                                                                                                                                                                                                                                           |
| 69  | General Secretariat for Development Planning (Qatar), Qatar Statistics Authority. Qatar Population Status Report 2012. 2012                                                                                                                                                                                                                                                                                    |
| 70  | Saudi Arabia PM2.5 and PM10 Data 2014 as it appears in Shaddick G, Thomas ML. Particulate Matter 2.5 and 10 Surface Monitor Station Expanded Database 2008-2017. [Unpublished]                                                                                                                                                                                                                                 |
| 71  | Saudi Arabia PM2.5 and PM10 Data 2015 as it appears in Shaddick G, Thomas ML. Particulate Matter 2.5 and 10 Surface Monitor Station Expanded Database 2008-2017. [Unpublished]                                                                                                                                                                                                                                 |
| 72  | Saudi Arabia PM2.5 and PM10 Data 2016 as it appears in Shaddick G, Thomas ML. Particulate Matter 2.5 and 10 Surface Monitor Station Expanded Database 2008-2017. [Unpublished]                                                                                                                                                                                                                                 |
| 73  | Saudi Arabia PM2.5 and PM10 Data 2017 as it appears in Shaddick G, Thomas ML. Particulate Matter 2.5 and 10 Surface Monitor Station Expanded Database 2008-2017. [Unpublished]                                                                                                                                                                                                                                 |
| 74  | Central Bureau of Statistics (Syria), League of Arab States. Syria Maternal and Child Health Survey 1993                                                                                                                                                                                                                                                                                                       |
| 75  | United Nations Children's Fund (UNICEF), Central Bureau of Statistics (Syria), Ministry of Health (Syria), Pan Arab Project for Family Health (PAPFAAM), Syria Multiple Indicator Cluster Survey 2006. New York, United States: United Nations Children's Fund (UNICEF)                                                                                                                                        |
| 76  | Boughlaghem K, Isom B. Effect of atmospheric pollutants on the air quality in Tunisia. Sci World J. 2012; 2012: 1-8 as it appears in Shaddick G, Thomas ML. Particulate Matter 2.5 and 10 Surface Monitor Station Expanded Database 2008-2017. [Unpublished]                                                                                                                                                   |
| 77  | World Health Organization (WHO), Tunisia World Health Survey 2003. Geneva, Switzerland: World Health Organization (WHO), 2005                                                                                                                                                                                                                                                                                  |
| 78  | Tunisia Multiple Indicator Cluster Survey 2006 as it appears in World Health Organization (WHO), WHO Household Energy Database 1974-2008. Geneva, Switzerland: World Health Organization (WHO), 2010                                                                                                                                                                                                           |
| 79  | Ministry of Regional Development and Planning (Tunisia), National Institute of Statistics (Tunisia), United Nations Children's Fund (UNICEF), Tunisia Multiple Indicator Cluster Survey 2011-2012. New York, United States of America: United Nations Children's Fund (UNICEF), 2014                                                                                                                           |
| 80  | Sezer H, Akkurt I, Guler N, Marakoğlu K, Berk S. A case-control study on the effect of exposure to different substances on the development of COPD. Ann Epidemiol. 2006; 16(1): 59-62                                                                                                                                                                                                                          |
| 81  | Airbase European Air Quality Database Version 8, 2014 as it appears in Shaddick G, Thomas ML. Particulate Matter 2.5 and 10 Surface Monitor Station Expanded Database 2008-2017. [Unpublished]                                                                                                                                                                                                                 |
| 82  | EEA Air Quality e-Reporting Database 2017 as it appears in Shaddick G, Thomas ML. Particulate Matter 2.5 and 10 Surface Monitor Station Expanded Database 2008-2017. [Unpublished]                                                                                                                                                                                                                             |
| 83  | EEA Air Quality e-Reporting Database 2018 as it appears in Shaddick G, Thomas ML. Particulate Matter 2.5 and 10 Surface Monitor Station Expanded Database 2008-2017. [Unpublished]                                                                                                                                                                                                                             |
| 84  | United Arab Emirates - Abu Dhabi Air Quality Monitoring System 2011 as it appears in Shaddick G, Thomas ML. Particulate Matter 2.5 and 10 Surface Monitor Station Expanded Database 2008-2017. [Unpublished]                                                                                                                                                                                                   |
| 85  | United Arab Emirates - Abu Dhabi Air Quality Monitoring System 2012 as it appears in Shaddick G, Thomas ML. Particulate Matter 2.5 and 10 Surface Monitor Station Expanded Database 2008-2017. [Unpublished]                                                                                                                                                                                                   |
| 86  | United Arab Emirates - Abu Dhabi Air Quality Monitoring System 2013 as it appears in Shaddick G, Thomas ML. Particulate Matter 2.5 and 10 Surface Monitor Station Expanded Database 2008-2017. [Unpublished]                                                                                                                                                                                                   |
| 87  | United Arab Emirates - Abu Dhabi Air Quality Monitoring System 2014 as it appears in Shaddick G, Thomas ML. Particulate Matter 2.5 and 10 Surface Monitor Station Expanded Database 2008-2017. [Unpublished]                                                                                                                                                                                                   |
| 88  | United Arab Emirates - Abu Dhabi Air Quality Monitoring System 2015 as it appears in Shaddick G, Thomas ML. Particulate Matter 2.5 and 10 Surface Monitor Station Expanded Database 2008-2017. [Unpublished]                                                                                                                                                                                                   |
| 89  | World Health Organization (WHO), United Arab Emirates World Health Survey 2003. Geneva, Switzerland: World Health Organization (WHO), 2005                                                                                                                                                                                                                                                                     |
| 90  | Al-Sonboli N, Hart CA, Al-Aghbari N, Al-Ansi A, Ashoor O, Cuevas LE. Human metapneumovirus and respiratory syncytial virus disease in children, Yemen. Emerg Infect Dis. 2006; 12(9): 1437-9                                                                                                                                                                                                                   |
| 91  | Ministry of Health (Yemen) and United Nations Children's Fund (UNICEF), Yemen Multiple Indicator Cluster Survey 2006. New York, United States: United Nations Children's Fund (UNICEF)                                                                                                                                                                                                                         |
| 92  | Central Statistical Organization (Yemen), League of Arab States, Macro International, Inc. Yemen Demographic and Health Survey 1991-1992. Fairfax, United States of America: ICF International                                                                                                                                                                                                                 |
| 93  | Yemen Household Budget Survey 1998 as it appears in World Health Organization (WHO), WHO Household Energy Database 1974-2008. Geneva, Switzerland: World Health Organization (WHO), 2010                                                                                                                                                                                                                       |
| 94  | Central Statistical Organization (Yemen), ICF International, Ministry of Public Health and Population (Yemen), Yemen Demographic and Health Survey 2013. Fairfax, United States of America: ICF International                                                                                                                                                                                                  |
| 95  | Magnusson R, Hägglund L, Wingfors H. Broad exposure screening of air pollutants in the occupational environment of Swedish soldiers deployed in Afghanistan. Mil Med. 2012; 177(3): 318-25 as it appears in Shaddick G, Thomas ML. Particulate Matter 2.5 and 10 Surface Monitor Station Expanded Database 2008-2017. [Unpublished]                                                                            |
| 96  | Central Statistics Organization (Afghanistan), European Union (EU), Ministry of Rural Rehabilitation and Development (Afghanistan). Afghanistan National Risk and Vulnerability Assessment 2005                                                                                                                                                                                                                |
| 97  | Indian Institute of Health Management Research (IIHMR), Johns Hopkins University, Ministry of Public Health (Afghanistan). Afghanistan Health Survey 2006                                                                                                                                                                                                                                                      |
| 98  | Central Statistics Organization (Afghanistan), ICF Macro, Indian Institute of Health Management Research (IIHMR), Ministry of Public Health (Afghanistan), World Health Organization Regional Office for the Eastern Mediterranean (EMRO-WHO), Afghanistan Special Demographic and Health Survey 2010. Fairfax, United States of America: ICF International                                                    |
| 99  | Central Statistics Organization (Afghanistan), United Nations Children's Fund (UNICEF), Afghanistan Multiple Indicator Cluster Survey 2010-2011. New York, United States of America: United Nations Children's Fund (UNICEF), 2013                                                                                                                                                                             |
| 100 | Central Statistics Organization (Afghanistan), ICF International, Ministry of Public Health (Afghanistan), Afghanistan Demographic and Health Survey 2015-2016. Fairfax, United States of America: ICF International, 2017                                                                                                                                                                                     |
| 101 | Central Statistics Organization (Afghanistan), ICON-INSTITUTE Consulting Group. Afghanistan Living Conditions Survey 2013-2014                                                                                                                                                                                                                                                                                 |
| 102 | Central Bureau of Statistics (Sudan), Federal Ministry of Health (Sudan), United Nations Children's Fund (UNICEF), Sudan Multiple Indicator Cluster Survey 2000. New York, United States of America: United Nations Children's Fund (UNICEF)                                                                                                                                                                   |
| 103 | Federal Ministry of Health (Sudan), League of Arab States. Sudan Maternal and Child Health Survey 1992-1993                                                                                                                                                                                                                                                                                                    |
| 104 | Ministry of Health (Southern Sudan), Federal Ministry of Health (Sudan), Southern Sudan Centre for Census, Statistics and Evaluation (SSCCCE), Central Bureau of Statistics (Sudan), Sudan Family Health Survey 2006                                                                                                                                                                                           |
| 105 | National Population Census Council (Sudan), Central Bureau of Statistics (Sudan), Southern Sudan Centre for Census, Statistics and Evaluation (SSCCCE), Minnesota Population Center. Sudan Population and Housing Census 2008 from the Integrated Public Use Microdata Series, International. [Machine-readable database]. Minneapolis: University of Minnesota, 2011                                          |
| 106 | Federal Ministry of Health and Central Bureau of Statistics, Sudan Household and Health Survey - 2, 2012, National report, Khartoum, Republic of Sudan: Federal Ministry of Health and Central Bureau of Statistics                                                                                                                                                                                            |
| 107 | Central Bureau of Statistics (Sudan), Ministry of Health (South Sudan). Sudan - North Multiple Indicator Cluster Survey 2010. New York, United States of America: United Nations Children's Fund (UNICEF), 2015                                                                                                                                                                                                |
| 108 | Central Bureau of Statistics (Sudan), Federal Ministry of Health (Sudan), United Nations Children's Fund (UNICEF), Sudan Multiple Indicator Cluster Survey 2014. New York, United States of America: United Nations Children's Fund (UNICEF), 2016                                                                                                                                                             |

**Supplementary Table 2. Age-standardised death and DALYs rates per 100 000 attributable to air pollution among countries in North Africa and Middle East in 1990 and 2019**

| NAME         | Deaths                 |                        | DALYs                           |                              |
|--------------|------------------------|------------------------|---------------------------------|------------------------------|
|              | 1990                   | 2019                   | 1990                            | 2019                         |
|              | 158.3<br>(139.1-177.8) | 98.8<br>(84.7-114.7)   | 4,884.2<br>(4,381.5-5,555.4)    | 2,710.4<br>(2,317.3-3,125.6) |
| Afghanistan  | 402.2<br>(324.1-504.7) | 238.3<br>(189.8-290.1) | 14,310.9<br>(11,460.9-17,782.8) | 6,992.3<br>(5,627.7-8,482.7) |
| Algeria      | 133.9<br>(100.2-172.7) | 78.8<br>(56.2-103.6)   | 3,242.4<br>(2,403.1-4,157.2)    | 1,873.1<br>(1,360.6-2,452.1) |
| Bahrain      | 218.5<br>(185.3-252.7) | 107.4<br>(86.6-132.7)  | 4,891.5<br>(4,166.2-5,611.1)    | 2,267.4<br>(1,840.5-2,768.8) |
| Egypt        | 200.5<br>(172.3-233.7) | 159.7<br>(119.2-203.0) | 6,289.6<br>(5,349.3-7,314.4)    | 4,034.8<br>(3,027.7-5,138.6) |
| Iran         | 116.4<br>(102.5-131.3) | 65.5<br>(56.5-74.0)    | 3,198.7<br>(2,826.7-3,625.6)    | 1,603.0<br>(1,404.7-1,813.8) |
| Iraq         | 172.9<br>(140.1-207.8) | 123.0<br>(95.5-150.6)  | 5,043.6<br>(4,205.0-5,964.9)    | 3,088.2<br>(2,399.6-3,837.4) |
| Jordan       | 101.2<br>(82.6-122.5)  | 56.3<br>(45.0-69.7)    | 2,559.9<br>(2,075.2-3,070.1)    | 1,447.3<br>(1,154.2-1,758.5) |
| Kuwait       | 93.0<br>(81.1-105.0)   | 65.0<br>(53.0-79.4)    | 2,481.6<br>(2,193.9-2,821.6)    | 1,709.5<br>(1,411.1-2,058.8) |
| Lebanon      | 95.6<br>(74.6-119.4)   | 65.5<br>(50.5-80.9)    | 2,490.4<br>(1,947.2-3,062.8)    | 1,674.6<br>(1,282.0-2,049.6) |
| Libya        | 90.8<br>(69.6-114.6)   | 71.9<br>(51.2-97.7)    | 2,665.1<br>(2,117.5-3,297.4)    | 1,962.9<br>(1,425.0-2,584.8) |
| Morocco      | 127.2<br>(100.9-153.7) | 105.5<br>(80.8-129.8)  | 3,825.8<br>(3,110.4-4,601.2)    | 2,617.0<br>(2,024.3-3,246.4) |
| Oman         | 214.0<br>(162.4-266.8) | 129.4<br>(102.4-157.3) | 5,145.6<br>(3,953.9-6,493.2)    | 2,667.0<br>(2,118.3-3,232.2) |
| Palestine    | 139.0<br>(105.0-176.3) | 92.2<br>(69.9-113.8)   | 3,401.6<br>(2,622.2-4,301.2)    | 2,119.4<br>(1,627.0-2,587.6) |
| Qatar        | 195.9<br>(162.5-232.6) | 131.2<br>(105.4-163.0) | 4,383.0<br>(3,689.1-5,189.6)    | 2,540.2<br>(2,039.5-3,125.5) |
| Saudi Arabia | 156.3<br>(123.2-190.2) | 112.0<br>(91.1-134.6)  | 4,003.5<br>(3,204.4-4,870.8)    | 2,831.1<br>(2,310.6-3,421.2) |
| Sudan        | 293.9<br>(241.7-365.0) | 149.3<br>(117.9-189.6) | 9,410.3<br>(7,782.7-11,582.0)   | 4,022.9<br>(3,219.5-5,027.8) |
| Syria        | 133.4<br>(103.5-167.3) | 101.4<br>(75.0-135.0)  | 3,710.2<br>(2,895.6-4,591.0)    | 2,434.6<br>(1,792.4-3,233.0) |
| UAE          | 172.1<br>(137.4-213.8) | 103.8<br>(77.7-134.3)  | 3,826.5<br>(3,073.0-4,772.5)    | 2,491.6<br>(1,889.3-3,211.0) |
| Tunisia      | 89.9<br>(69.4-112.5)   | 65.2<br>(44.9-88.9)    | 2,434.3<br>(1,881.6-3,044.3)    | 1,608.3<br>(1,166.6-2,133.4) |
| Turkey       | 102.4<br>(86.5-120.7)  | 53.3<br>(40.8-68.5)    | 3,156.3<br>(2,587.5-3,803.4)    | 1,329.2<br>(1,033.7-1,654.7) |
| Yemen        | 283.0<br>(218.4-368.8) | 154.0<br>(116.3-202.0) | 8,823.6<br>(7,018.5-11,116.2)   | 4,212.4<br>(3,241.3-5,418.1) |

**Supplementary Table 3. All-ages deaths attributable to air pollution and its sub-types among countries in North Africa and Middle East in 2019**

|              | Air pollution                | Particulate matter pollution | Ambient particulate matter pollution | Household air pollution from solid fuels | Ambient ozone pollution  |
|--------------|------------------------------|------------------------------|--------------------------------------|------------------------------------------|--------------------------|
| NAME         | 398,559<br>(339,434-463,723) | 391,042<br>(332,909-454,990) | 339,456<br>(284,221-396,047)         | 51,586<br>(35,572-70,524)                | 10,315<br>(4,691-16,290) |
| Afghanistan  | 37,033<br>(29,774-45,042)    | 36,847<br>(29,560-44,803)    | 8,679<br>(4,029-16,057)              | 28,168<br>(19,479-37,650)                | 475<br>(214-786)         |
| Algeria      | 22,162<br>(15,819-29,631)    | 21,680<br>(15,341-28,991)    | 21,613<br>(15,285-28,926)            | 66<br>(25-138)                           | 616<br>(283-1,037)       |
| Bahrain      | 638<br>(508-800)             | 625<br>(495-785)             | 624<br>(494-783)                     | 2<br>(0-4)                               | 19<br>(9-32)             |
| Egypt        | 91,663<br>(67,756-118,198)   | 90,632<br>(66,870-116,905)   | 90,559<br>(66,819-116,869)           | 73<br>(26-170)                           | 1,610<br>(681-2,741)     |
| Iran         | 43,203<br>(37,478-48,717)    | 41,839<br>(36,244-47,155)    | 41,742<br>(36,156-47,037)            | 97<br>(38-217)                           | 1,794<br>(842-2,766)     |
| Iraq         | 25,626<br>(19,579-31,849)    | 25,442<br>(19,417-31,662)    | 25,378<br>(19,358-31,598)            | 64<br>(22-136)                           | 259<br>(122-412)         |
| Jordan       | 3,131<br>(2,499-3,881)       | 3,075<br>(2,455-3,822)       | 3,074<br>(2,453-3,820)               | 2<br>(0-4)                               | 71<br>(34-114)           |
| Kuwait       | 1,543<br>(1,275-1,897)       | 1,527<br>(1,262-1,868)       | 1,526<br>(1,260-1,868)               | 1<br>(0-2)                               | 25<br>(11-41)            |
| Lebanon      | 3,382<br>(2,614-4,203)       | 3,312<br>(2,528-4,128)       | 3,303<br>(2,517-4,107)               | 10<br>(3-23)                             | 86<br>(35-150)           |
| Libya        | 3,445<br>(2,441-4,701)       | 3,375<br>(2,390-4,620)       | 3,368<br>(2,381-4,613)               | 8<br>(2-19)                              | 92<br>(41-157)           |
| Morocco      | 29,249<br>(22,074-36,163)    | 28,743<br>(21,626-35,760)    | 27,063<br>(20,245-34,050)            | 1,679<br>(733-3,317)                     | 665<br>(293-1,105)       |
| Oman         | 1,576<br>(1,241-1,913)       | 1,559<br>(1,225-1,899)       | 1,553<br>(1,216-1,894)               | 6<br>(2-16)                              | 23<br>(10-37)            |
| Palestine    | 1,848<br>(1,401-2,278)       | 1,820<br>(1,383-2,251)       | 1,792<br>(1,362-2,219)               | 28<br>(13-57)                            | 35<br>(16-57)            |
| Qatar        | 545<br>(416-717)             | 539<br>(411-709)             | 539<br>(411-709)                     | 0<br>(0-0)                               | 9<br>(5-16)              |
| Saudi Arabia | 18,036<br>(14,220-22,351)    | 17,832<br>(14,055-22,170)    | 17,795<br>(13,993-22,106)            | 37<br>(9-100)                            | 310<br>(140-491)         |
| Sudan        | 28,163<br>(22,325-35,706)    | 27,944<br>(22,149-35,432)    | 16,634<br>(10,204-24,378)            | 11,310<br>(6,569-17,281)                 | 372<br>(153-667)         |
| Syria        | 10,671<br>(7,723-14,480)     | 10,491<br>(7,606-14,188)     | 10,474<br>(7,596-14,159)             | 18<br>(6-41)                             | 227<br>(99-393)          |
| UAE          | 3,361<br>(2,360-4,656)       | 3,252<br>(2,259-4,490)       | 3,252<br>(2,259-4,490)               | 0<br>(0-0)                               | 149<br>(59-264)          |
| Tunisia      | 7,530<br>(5,194-10,288)      | 7,358<br>(5,088-10,135)      | 7,337<br>(5,059-10,121)              | 21<br>(7-50)                             | 216<br>(94-361)          |
| Turkey       | 44,166<br>(33,650-56,769)    | 41,760<br>(31,571-53,456)    | 41,524<br>(31,395-53,238)            | 236<br>(73-595)                          | 2,933<br>(1,229-5,046)   |
| Yemen        | 21,184<br>(16,008-27,529)    | 20,991<br>(15,846-27,214)    | 11,282<br>(5,681-17,408)             | 9,709<br>(5,596-14,628)                  | 316<br>(138-547)         |

**Supplementary Table 4. Age-standardised death rates per 100 000 attributable to air pollution and its sub-types among countries in North Africa and Middle East in 2019**

| NAME         | Air pollution                |                                      | Ambient ozone pollution                  |                        |
|--------------|------------------------------|--------------------------------------|------------------------------------------|------------------------|
|              | Particulate matter pollution | Ambient particulate matter pollution | Household air pollution from solid fuels |                        |
|              | 98.8<br>(84.7-114.7)         | 96.6<br>(82.6-111.9)                 | 85.2<br>(72.0-98.8)                      | 11.5<br>(7.8-15.7)     |
| Afghanistan  | 238.3<br>(189.8-290.1)       | 236.4<br>(187.9-288.4)               | 56.9<br>(26.3-103.1)                     | 179.5<br>(123.3-242.1) |
| Algeria      | 78.8<br>(56.2-103.6)         | 76.8<br>(54.5-101.8)                 | 76.5<br>(54.2-101.6)                     | 0.2<br>(0.1-0.5)       |
| Bahrain      | 107.4<br>(86.6-132.7)        | 104.0<br>(83.6-128.5)                | 103.7<br>(83.4-128.2)                    | 0.3<br>(0.1-0.7)       |
| Egypt        | 159.7<br>(119.2-203.0)       | 157.6<br>(117.6-200.2)               | 157.5<br>(117.5-200.1)                   | 0.1<br>(0.0-0.3)       |
| Iran         | 65.5<br>(56.5-74.0)          | 63.3<br>(54.7-71.5)                  | 63.1<br>(54.5-71.4)                      | 0.1<br>(0.1-0.3)       |
| Iraq         | 123.0<br>(95.5-150.6)        | 121.9<br>(94.6-149.5)                | 121.6<br>(94.4-149.3)                    | 0.3<br>(0.1-0.7)       |
| Jordan       | 56.3<br>(45.0-69.7)          | 55.0<br>(44.0-68.3)                  | 55.0<br>(43.9-68.3)                      | 0.0<br>(0.0-0.1)       |
| Kuwait       | 65.0<br>(53.0-79.4)          | 64.1<br>(52.5-78.4)                  | 64.1<br>(52.4-78.4)                      | 0.0<br>(0.0-0.1)       |
| Lebanon      | 65.5<br>(50.5-80.9)          | 64.1<br>(49.1-79.7)                  | 63.9<br>(48.9-79.1)                      | 0.2<br>(0.1-0.4)       |
| Libya        | 71.9<br>(51.2-97.7)          | 70.3<br>(50.0-96.0)                  | 70.1<br>(49.9-95.8)                      | 0.2<br>(0.0-0.4)       |
| Morocco      | 105.5<br>(80.8-129.8)        | 103.5<br>(79.0-126.9)                | 97.4<br>(73.4-121.5)                     | 6.1<br>(2.7-12.0)      |
| Oman         | 129.4<br>(102.4-157.3)       | 127.5<br>(100.4-155.7)               | 127.0<br>(100.2-154.6)                   | 0.5<br>(0.1-1.3)       |
| Palestine    | 92.2<br>(69.9-113.8)         | 90.6<br>(68.7-112.5)                 | 89.1<br>(67.0-110.3)                     | 1.4<br>(0.6-2.8)       |
| Qatar        | 131.2<br>(105.4-163.0)       | 128.9<br>(103.1-159.5)               | 128.9<br>(103.1-159.5)                   | 0.0<br>(0.0-0.0)       |
| Saudi Arabia | 112.0<br>(91.1-134.6)        | 110.1<br>(89.5-132.7)                | 109.8<br>(89.3-132.5)                    | 0.2<br>(0.1-0.6)       |
| Sudan        | 149.3<br>(117.9-189.6)       | 147.9<br>(116.0-188.0)               | 88.7<br>(54.4-130.9)                     | 59.1<br>(34.8-90.7)    |
| Syria        | 101.4<br>(75.0-135.0)        | 99.4<br>(73.5-131.9)                 | 99.3<br>(73.3-131.8)                     | 0.2<br>(0.1-0.4)       |
| UAE          | 103.8<br>(77.7-134.3)        | 100.7<br>(74.2-130.6)                | 100.7<br>(74.2-130.6)                    | 0.0<br>(0.0-0.0)       |
| Tunisia      | 65.2<br>(44.9-88.9)          | 63.6<br>(44.0-87.4)                  | 63.4<br>(43.8-87.2)                      | 0.2<br>(0.1-0.4)       |
| Turkey       | 53.3<br>(40.8-68.5)          | 50.4<br>(38.2-64.1)                  | 50.1<br>(38.0-63.9)                      | 0.3<br>(0.1-0.7)       |
| Yemen        | 154.0<br>(116.3-202.0)       | 152.1<br>(114.6-199.3)               | 82.5<br>(42.3-128.2)                     | 69.6<br>(39.4-106.3)   |

**Supplementary Table 5. The proportion of deaths attributable to air pollution in both sexes by age-groups in North Africa and Middle East in 1990 and 2019**

|                  | 1990                 |                      |                      | 2019                 |                      |                      |
|------------------|----------------------|----------------------|----------------------|----------------------|----------------------|----------------------|
|                  | Both                 | Female               | Male                 | Both                 | Female               | Male                 |
| Under 5          | 9.9%<br>(8.1-12.4)   | 9.8%<br>(7.8-12.5)   | 10.0%<br>(8.0-12.8)  | 9.4%<br>(8.1-10.8)   | 9.5%<br>(7.9-11.3)   | 9.4%<br>(7.8-11.0)   |
| 5 to 9           | 2.5%<br>(1.5-3.4)    | 2.9%<br>(1.5-4.1)    | 2.1%<br>(1.3-2.9)    | 2.5%<br>(1.7-3.5)    | 2.8%<br>(1.6-4.0)    | 2.2%<br>(1.4-3.2)    |
| 10 to 14         | 1.7%<br>(1.2-2.3)    | 2.1%<br>(1.2-2.8)    | 1.5%<br>(1.0-2.0)    | 1.8%<br>(1.3-2.5)    | 2.0%<br>(1.3-2.8)    | 1.7%<br>(1.1-2.4)    |
| 15 to 19         | 0.7%<br>(0.5-1.0)    | 1.0%<br>(0.7-1.4)    | 0.6%<br>(0.4-0.8)    | 0.8%<br>(0.6-1.1)    | 0.9%<br>(0.6-1.3)    | 0.7%<br>(0.5-1.0)    |
| 20 to 24         | 0.6%<br>(0.5-0.8)    | 0.9%<br>(0.6-1.2)    | 0.4%<br>(0.3-0.6)    | 0.6%<br>(0.4-0.8)    | 0.9%<br>(0.6-1.2)    | 0.5%<br>(0.3-0.7)    |
| 25 to 29         | 6.3%<br>(5.3-7.4)    | 6.9%<br>(5.9-8.1)    | 5.8%<br>(4.7-7.0)    | 6.4%<br>(5.4-7.6)    | 7.4%<br>(6.2-8.6)    | 5.9%<br>(4.7-7.3)    |
| 30 to 34         | 8.5%<br>(7.2-9.9)    | 9.0%<br>(7.6-10.5)   | 8.1%<br>(6.8-9.9)    | 8.3%<br>(6.8-9.7)    | 9.3%<br>(7.7-10.9)   | 7.7%<br>(6.2-9.6)    |
| 35 to 39         | 11.0%<br>(9.4-12.9)  | 10.9%<br>(9.4-12.6)  | 11.1%<br>(9.2-13.6)  | 10.3%<br>(8.8-12.3)  | 10.7%<br>(9.0-12.4)  | 10.1%<br>(8.4-12.7)  |
| 40 to 44         | 13.7%<br>(11.6-16.0) | 13.2%<br>(11.3-15.3) | 13.9%<br>(11.6-16.6) | 12.8%<br>(10.9-15.0) | 12.5%<br>(10.4-14.3) | 13.0%<br>(10.8-15.6) |
| 45 to 49         | 16.9%<br>(14.5-19.6) | 16.6%<br>(14.2-19.4) | 17.1%<br>(14.3-20.1) | 15.7%<br>(13.4-18.3) | 14.9%<br>(12.7-17.2) | 16.3%<br>(13.6-19.4) |
| 50 to 54         | 17.9%<br>(15.1-20.8) | 17.5%<br>(14.8-20.4) | 18.2%<br>(15.2-21.4) | 16.7%<br>(14.3-19.2) | 15.7%<br>(13.5-18.1) | 17.3%<br>(14.6-20.2) |
| 55 to 59         | 18.2%<br>(15.3-21.4) | 17.7%<br>(14.9-21.1) | 18.5%<br>(15.5-21.9) | 16.9%<br>(14.3-19.6) | 16.1%<br>(13.7-18.6) | 17.5%<br>(14.6-20.6) |
| 60 to 64         | 18.2%<br>(15.5-21.3) | 18.3%<br>(15.4-21.3) | 18.2%<br>(15.4-21.2) | 16.8%<br>(14.4-19.4) | 16.5%<br>(14.1-19.1) | 17.0%<br>(14.4-19.8) |
| 65 to 69         | 17.8%<br>(15.1-21.0) | 17.8%<br>(15.0-21.1) | 17.8%<br>(15.2-21.0) | 16.3%<br>(13.8-18.7) | 16.1%<br>(13.7-18.6) | 16.4%<br>(13.9-18.9) |
| 70 to 74         | 17.1%<br>(14.3-20.2) | 17.4%<br>(14.4-20.7) | 16.9%<br>(14.1-20.1) | 15.1%<br>(12.9-17.5) | 15.1%<br>(12.8-17.5) | 15.1%<br>(12.8-17.5) |
| 75 to 79         | 16.0%<br>(13.2-19.1) | 16.0%<br>(12.9-19.4) | 16.0%<br>(13.3-18.9) | 14.0%<br>(11.8-16.2) | 14.0%<br>(11.6-16.3) | 14.1%<br>(11.8-16.3) |
| 80 to 84         | 14.3%<br>(11.8-17.5) | 14.3%<br>(11.6-17.7) | 14.3%<br>(11.8-17.2) | 12.3%<br>(10.3-14.5) | 12.3%<br>(10.1-14.4) | 12.4%<br>(10.4-14.5) |
| 85 to 89         | 12.3%<br>(9.9-14.8)  | 12.2%<br>(9.6-14.9)  | 12.4%<br>(10.1-14.8) | 10.6%<br>(8.6-12.6)  | 10.5%<br>(8.5-12.6)  | 10.8%<br>(8.7-12.7)  |
| 90 to 94         | 10.2%<br>(7.8-12.5)  | 10.1%<br>(7.6-12.6)  | 10.2%<br>(7.9-12.5)  | 8.9%<br>(6.9-10.9)   | 8.7%<br>(6.7-10.6)   | 9.1%<br>(7.2-11.1)   |
| 95 plus          | 8.1%<br>(5.9-10.2)   | 8.0%<br>(5.7-10.2)   | 8.2%<br>(6.2-10.2)   | 7.2%<br>(5.4-8.7)    | 7.0%<br>(5.1-8.5)    | 7.4%<br>(5.7-8.9)    |
| All Ages         | 12.3%<br>(11.2-13.8) | 12.2%<br>(11.0-13.7) | 12.4%<br>(11.2-14.0) | 12.8%<br>(11.6-14.2) | 12.6%<br>(11.3-14.0) | 13.0%<br>(11.7-14.5) |
| Age-standardised | 13.8%<br>(12.3-15.4) | 13.7%<br>(12.1-15.4) | 13.9%<br>(12.5-15.5) | 12.8%<br>(11.4-14.1) | 12.5%<br>(11.0-13.9) | 13.0%<br>(11.6-14.4) |



**Supplementary Table 6. All-ages DALYs attributable to air pollution and its sub-types among countries in North Africa and Middle East in 2019**

| NAME         | Air pollution                         |                                          | Ambient particulate matter pollution |                                    | Ambient ozone pollution     |
|--------------|---------------------------------------|------------------------------------------|--------------------------------------|------------------------------------|-----------------------------|
|              | Particulate matter pollution          | Household air pollution from solid fuels |                                      |                                    |                             |
|              | 13,056,864<br>(11,145,813-15,128,048) | 12,913,831<br>(11,041,330-14,981,099)    | 10,569,826<br>(8,866,135-12,416,213) | 2,344,005<br>(1,617,635-3,125,700) | 199,665<br>(91,412-316,069) |
| Afghanistan  | 1,849,170<br>(1,485,560-2,250,664)    | 1,844,663<br>(1,482,722-2,247,858)       | 421,330<br>(194,229-771,057)         | 1,423,333<br>(989,316-1,896,253)   | 11,529<br>(5,064-19,295)    |
| Algeria      | 654,753<br>(474,698-855,730)          | 646,191<br>(465,841-847,016)             | 644,038<br>(460,511-844,371)         | 2,153<br>(855-4,494)               | 10,933<br>(5,004-18,307)    |
| Bahrain      | 22,129<br>(17,716-27,370)             | 21,883<br>(17,437-27,108)                | 21,817<br>(17,401-27,007)            | 66<br>(22-152)                     | 369<br>(168-617)            |
| Egypt        | 2,852,145<br>(2,127,564-3,667,673)    | 2,829,087<br>(2,110,966-3,643,778)       | 2,826,672<br>(2,109,892-3,642,261)   | 2,415<br>(961-5,462)               | 36,026<br>(15,053-61,660)   |
| Iran         | 1,190,330<br>(1,042,443-1,349,000)    | 1,166,154<br>(1,018,765-1,322,534)       | 1,162,989<br>(1,017,542-1,318,067)   | 3,165<br>(1,313-6,900)             | 31,852<br>(15,156-48,998)   |
| Iraq         | 812,427<br>(633,004-1,019,981)        | 808,672<br>(630,365-1,016,097)           | 806,497<br>(629,066-1,014,743)       | 2,175<br>(789-4,611)               | 5,287<br>(2,473-8,387)      |
| Jordan       | 107,365<br>(85,574-131,797)           | 106,253<br>(84,622-130,424)              | 106,197<br>(84,582-130,378)          | 55<br>(19-125)                     | 1,402<br>(666-2,251)        |
| Kuwait       | 55,184<br>(45,487-67,036)             | 54,914<br>(45,248-66,653)                | 54,886<br>(45,212-66,619)            | 28<br>(9-71)                       | 409<br>(180-694)            |
| Lebanon      | 87,694<br>(67,136-107,256)            | 86,562<br>(66,041-106,271)               | 86,279<br>(65,847-105,967)           | 283<br>(95-650)                    | 1,409<br>(582-2,496)        |
| Libya        | 108,846<br>(78,263-144,897)           | 107,493<br>(77,197-143,228)              | 107,207<br>(76,991-142,992)          | 286<br>(94-671)                    | 1,794<br>(793-3,078)        |
| Morocco      | 826,112<br>(633,361-1,040,719)        | 816,389<br>(627,015-1,029,923)           | 766,926<br>(582,464-971,836)         | 49,463<br>(22,059-97,060)          | 12,782<br>(5,627-21,253)    |
| Oman         | 50,843<br>(40,109-62,250)             | 50,516<br>(39,770-61,952)                | 50,276<br>(39,536-61,513)            | 241<br>(79-552)                    | 450<br>(202-721)            |
| Palestine    | 55,374<br>(43,554-67,487)             | 54,830<br>(43,129-66,991)                | 53,927<br>(42,041-66,027)            | 903<br>(417-1,776)                 | 690<br>(316-1,110)          |
| Qatar        | 25,039<br>(19,801-31,509)             | 24,894<br>(19,677-31,250)                | 24,892<br>(19,674-31,248)            | 2<br>(1-5)                         | 237<br>(116-402)            |
| Saudi Arabia | 659,239<br>(519,196-823,068)          | 654,330<br>(515,275-818,298)             | 652,668<br>(511,795-816,660)         | 1,662<br>(549-4,068)               | 7,441<br>(3,410-11,960)     |
| Sudan        | 1,058,647<br>(816,291-1,332,226)      | 1,054,163<br>(811,316-1,326,078)         | 612,394<br>(364,525-895,741)         | 441,769<br>(250,451-670,568)       | 7,639<br>(3,107-14,158)     |
| Syria        | 305,020<br>(221,150-410,574)          | 301,341<br>(219,268-405,364)             | 300,810<br>(218,805-404,543)         | 531<br>(196-1,213)                 | 4,644<br>(2,030-7,977)      |
| UAE          | 147,250<br>(107,970-198,734)          | 143,110<br>(103,881-193,166)             | 143,103<br>(103,876-193,162)         | 7<br>(2-19)                        | 5,680<br>(2,093-10,186)     |
| Tunisia      | 197,299<br>(141,925-265,118)          | 194,357<br>(139,430-261,703)             | 193,749<br>(138,935-261,100)         | 608<br>(223-1,389)                 | 3,697<br>(1,601-6,268)      |
| Turkey       | 1,121,784<br>(872,449-1,412,431)      | 1,082,245<br>(838,547-1,356,307)         | 1,075,598<br>(833,084-1,352,670)     | 6,647<br>(2,275-16,111)            | 48,187<br>(21,045-81,553)   |
| Yemen        | 856,948<br>(657,364-1,110,810)        | 852,665<br>(654,532-1,104,671)           | 446,833<br>(227,070-680,407)         | 405,832<br>(233,140-612,315)       | 7,005<br>(3,009-12,205)     |

**Supplementary Table 7. The proportion of DALYs attributable to air pollution in both sexes by age-groups in North Africa and Middle East in 1990 and 2019**

|                  | 1990                 |                      |                      | 2019                 |                      |                      |
|------------------|----------------------|----------------------|----------------------|----------------------|----------------------|----------------------|
|                  | Both                 | Female               | Male                 | Both                 | Female               | Male                 |
| Under 5          | 9.7%<br>(7.9-12.1)   | 9.6%<br>(7.6-12.2)   | 9.8%<br>(7.8-12.5)   | 8.7%<br>(7.5-9.9)    | 8.7%<br>(7.2-10.3)   | 8.7%<br>(7.2-10.2)   |
| 5 to 9           | 1.8%<br>(1.0-2.4)    | 2.0%<br>(1.0-2.8)    | 1.6%<br>(1.0-2.2)    | 1.2%<br>(0.8-1.7)    | 1.3%<br>(0.7-1.9)    | 1.1%<br>(0.7-1.7)    |
| 10 to 14         | 1.0%<br>(0.7-1.3)    | 1.0%<br>(0.6-1.5)    | 0.9%<br>(0.6-1.3)    | 0.7%<br>(0.4-1.0)    | 0.7%<br>(0.4-1.0)    | 0.7%<br>(0.4-1.0)    |
| 15 to 19         | 0.4%<br>(0.3-0.6)    | 0.5%<br>(0.3-0.7)    | 0.4%<br>(0.3-0.5)    | 0.3%<br>(0.2-0.5)    | 0.3%<br>(0.2-0.5)    | 0.4%<br>(0.2-0.5)    |
| 20 to 24         | 0.3%<br>(0.2-0.5)    | 0.4%<br>(0.3-0.6)    | 0.3%<br>(0.2-0.4)    | 0.3%<br>(0.2-0.4)    | 0.3%<br>(0.2-0.4)    | 0.3%<br>(0.2-0.4)    |
| 25 to 29         | 3.6%<br>(2.9-4.4)    | 3.4%<br>(2.7-4.2)    | 3.8%<br>(3.1-4.7)    | 3.1%<br>(2.4-3.9)    | 2.7%<br>(2.1-3.4)    | 3.5%<br>(2.7-4.4)    |
| 30 to 34         | 4.7%<br>(3.9-5.8)    | 4.3%<br>(3.4-5.2)    | 5.2%<br>(4.2-6.4)    | 3.9%<br>(3.1-4.9)    | 3.4%<br>(2.6-4.3)    | 4.4%<br>(3.4-5.5)    |
| 35 to 39         | 6.4%<br>(5.3-7.7)    | 5.5%<br>(4.5-6.7)    | 7.3%<br>(6.0-8.9)    | 5.0%<br>(3.9-6.1)    | 4.2%<br>(3.2-5.2)    | 5.8%<br>(4.6-7.3)    |
| 40 to 44         | 8.4%<br>(6.9-10.1)   | 7.0%<br>(5.7-8.5)    | 9.6%<br>(7.9-11.7)   | 6.8%<br>(5.5-8.3)    | 5.5%<br>(4.4-6.7)    | 8.0%<br>(6.5-9.9)    |
| 45 to 49         | 11.4%<br>(9.4-13.5)  | 9.9%<br>(8.1-11.8)   | 12.7%<br>(10.4-15.1) | 9.5%<br>(7.7-11.4)   | 7.8%<br>(6.3-9.5)    | 10.9%<br>(8.9-13.2)  |
| 50 to 54         | 13.2%<br>(11.2-15.7) | 11.7%<br>(9.8-14.2)  | 14.4%<br>(12.1-17.1) | 11.3%<br>(9.4-13.5)  | 9.5%<br>(7.8-11.4)   | 12.8%<br>(10.7-15.1) |
| 55 to 59         | 14.3%<br>(12.0-16.9) | 12.8%<br>(10.7-15.4) | 15.3%<br>(12.9-18.1) | 12.4%<br>(10.4-14.7) | 10.8%<br>(9.1-12.8)  | 13.7%<br>(11.5-16.2) |
| 60 to 64         | 15.0%<br>(12.8-17.5) | 14.3%<br>(12.1-16.9) | 15.6%<br>(13.1-18.1) | 13.2%<br>(11.2-15.4) | 12.2%<br>(10.3-14.3) | 13.9%<br>(11.7-16.3) |
| 65 to 69         | 15.1%<br>(12.8-17.8) | 14.5%<br>(12.2-17.2) | 15.5%<br>(13.1-18.3) | 13.2%<br>(11.2-15.5) | 12.6%<br>(10.6-14.7) | 13.8%<br>(11.6-16.0) |
| 70 to 74         | 14.8%<br>(12.3-17.6) | 14.7%<br>(12.2-17.6) | 14.9%<br>(12.4-17.7) | 12.7%<br>(10.7-14.7) | 12.3%<br>(10.4-14.4) | 13.0%<br>(10.9-15.1) |
| 75 to 79         | 14.1%<br>(11.6-16.8) | 13.9%<br>(11.3-16.9) | 14.3%<br>(11.8-16.9) | 12.1%<br>(10.2-14.0) | 11.8%<br>(9.9-13.8)  | 12.3%<br>(10.5-14.3) |
| 80 to 84         | 12.7%<br>(10.5-15.4) | 12.6%<br>(10.3-15.4) | 12.8%<br>(10.6-15.3) | 10.7%<br>(9.1-12.5)  | 10.6%<br>(8.9-12.4)  | 10.9%<br>(9.3-12.6)  |
| 85 to 89         | 10.9%<br>(9.0-13.1)  | 10.8%<br>(8.7-13.2)  | 11.1%<br>(9.2-13.2)  | 9.4%<br>(7.8-11.2)   | 9.3%<br>(7.7-11.0)   | 9.6%<br>(7.9-11.3)   |
| 90 to 94         | 9.1%<br>(7.1-11.1)   | 9.0%<br>(6.9-11.1)   | 9.2%<br>(7.3-11.1)   | 8.0%<br>(6.3-9.6)    | 7.7%<br>(6.0-9.3)    | 8.2%<br>(6.6-9.9)    |
| 95 plus          | 7.3%<br>(5.5-9.1)    | 7.3%<br>(5.4-9.1)    | 7.4%<br>(5.7-9.1)    | 6.5%<br>(5.0-7.8)    | 6.3%<br>(4.7-7.6)    | 6.7%<br>(5.2-8.1)    |
| All Ages         | 8.8%<br>(7.7-10.3)   | 8.5%<br>(7.2-10.1)   | 9.1%<br>(7.9-10.7)   | 8.0%<br>(7.0-9.1)    | 7.3%<br>(6.2-8.4)    | 8.6%<br>(7.5-9.8)    |
| Age-standardised | 9.9%<br>(8.8-11.2)   | 9.4%<br>(8.3-10.8)   | 10.4%<br>(9.3-11.7)  | 8.7%<br>(7.6-9.9)    | 8.0%<br>(6.9-9.1)    | 9.3%<br>(8.3-10.5)   |

**Supplementary Table 8. Age-standardised DALYs rates per 100 000 attributable to air pollution and its sub-types among countries in North Africa and Middle East in 2019**

| NAME         | Air pollution                | Particulate matter pollution | Ambient particulate matter pollution | Household air pollution from solid fuels | Ambient ozone pollution |
|--------------|------------------------------|------------------------------|--------------------------------------|------------------------------------------|-------------------------|
|              |                              |                              |                                      |                                          |                         |
|              | 2,710.4<br>(2,317.3-3,125.6) | 2,674.5<br>(2,290.5-3,087.7) | 2,233.6<br>(1,874.6-2,613.0)         | 440.9<br>(305.1-591.1)                   | 49.6<br>(22.6-78.7)     |
| Afghanistan  | 6,992.3<br>(5,627.7-8,482.7) | 6,955.5<br>(5,597.2-8,458.2) | 1,627.2<br>(743.8-2,980.8)           | 5,328.4<br>(3,722.0-7,108.4)             | 94.0<br>(41.5-155.1)    |
| Algeria      | 1,873.1<br>(1,360.6-2,452.1) | 1,844.1<br>(1,334.3-2,411.5) | 1,837.9<br>(1,330.3-2,405.8)         | 6.2<br>(2.5-12.6)                        | 37.0<br>(17.0-62.5)     |
| Bahrain      | 2,267.4<br>(1,840.5-2,768.8) | 2,223.6<br>(1,796.5-2,717.6) | 2,216.4<br>(1,791.3-2,702.8)         | 7.1<br>(2.5-16.4)                        | 65.8<br>(30.4-110.1)    |
| Egypt        | 4,034.8<br>(3,027.7-5,138.6) | 3,996.7<br>(3,007.2-5,109.1) | 3,993.2<br>(3,004.7-5,103.7)         | 3.5<br>(1.4-7.8)                         | 59.6<br>(25.2-101.6)    |
| Iran         | 1,603.0<br>(1,404.7-1,813.8) | 1,568.1<br>(1,369.9-1,772.3) | 1,563.8<br>(1,364.6-1,767.5)         | 4.3<br>(1.8-9.3)                         | 46.0<br>(21.9-70.8)     |
| Iraq         | 3,088.2<br>(2,399.6-3,837.4) | 3,070.4<br>(2,384.4-3,820.8) | 3,062.1<br>(2,378.8-3,811.0)         | 8.3<br>(3.1-17.4)                        | 25.1<br>(11.9-39.9)     |
| Jordan       | 1,447.3<br>(1,154.2-1,758.5) | 1,427.7<br>(1,140.3-1,734.6) | 1,427.0<br>(1,139.9-1,733.9)         | 0.8<br>(0.3-1.7)                         | 24.7<br>(11.7-39.7)     |
| Kuwait       | 1,709.5<br>(1,411.1-2,058.8) | 1,696.3<br>(1,399.6-2,048.1) | 1,695.4<br>(1,399.2-2,047.4)         | 1.0<br>(0.3-2.3)                         | 20.0<br>(8.8-33.2)      |
| Lebanon      | 1,674.6<br>(1,282.0-2,049.6) | 1,652.9<br>(1,262.5-2,029.7) | 1,647.5<br>(1,255.6-2,026.4)         | 5.4<br>(1.8-12.4)                        | 27.1<br>(11.1-47.9)     |
| Libya        | 1,962.9<br>(1,425.0-2,584.8) | 1,935.3<br>(1,408.5-2,553.4) | 1,929.9<br>(1,402.4-2,546.0)         | 5.3<br>(1.8-12.3)                        | 36.6<br>(16.2-62.6)     |
| Morocco      | 2,617.0<br>(2,024.3-3,246.4) | 2,583.1<br>(2,001.0-3,211.7) | 2,425.7<br>(1,865.8-3,037.8)         | 157.5<br>(70.7-308.3)                    | 44.5<br>(19.4-74.1)     |
| Oman         | 2,667.0<br>(2,118.3-3,232.2) | 2,639.2<br>(2,083.9-3,199.4) | 2,626.0<br>(2,077.9-3,186.2)         | 13.2<br>(4.5-29.9)                       | 38.2<br>(16.6-61.2)     |
| Palestine    | 2,119.4<br>(1,627.0-2,587.6) | 2,093.1<br>(1,609.8-2,552.7) | 2,058.4<br>(1,566.3-2,521.4)         | 34.8<br>(16.4-68.1)                      | 33.3<br>(15.4-53.9)     |
| Qatar        | 2,540.2<br>(2,039.5-3,125.5) | 2,510.4<br>(2,015.5-3,082.6) | 2,510.2<br>(2,015.2-3,082.3)         | 0.2<br>(0.1-0.6)                         | 48.6<br>(24.2-81.1)     |
| Saudi Arabia | 2,831.1<br>(2,310.6-3,421.2) | 2,800.0<br>(2,284.8-3,390.3) | 2,792.0<br>(2,278.4-3,383.9)         | 8.0<br>(2.8-18.3)                        | 47.2<br>(21.4-75.3)     |
| Sudan        | 4,022.9<br>(3,219.5-5,027.8) | 3,997.6<br>(3,198.1-4,995.5) | 2,354.2<br>(1,440.2-3,438.2)         | 1,643.5<br>(968.3-2,465.3)               | 43.0<br>(17.7-77.9)     |
| Syria        | 2,434.6<br>(1,792.4-3,233.0) | 2,401.5<br>(1,768.8-3,194.9) | 2,397.2<br>(1,766.9-3,192.3)         | 4.3<br>(1.6-9.7)                         | 41.7<br>(18.0-72.0)     |
| UAE          | 2,491.6<br>(1,889.3-3,211.0) | 2,430.2<br>(1,835.7-3,130.9) | 2,430.1<br>(1,835.6-3,130.9)         | 0.1<br>(0.0-0.4)                         | 84.2<br>(37.8-141.9)    |
| Tunisia      | 1,608.3<br>(1,166.6-2,133.4) | 1,583.6<br>(1,142.0-2,104.7) | 1,578.6<br>(1,139.4-2,099.6)         | 5.0<br>(1.8-11.4)                        | 31.0<br>(13.4-52.2)     |
| Turkey       | 1,329.2<br>(1,033.7-1,654.7) | 1,282.6<br>(997.4-1,598.2)   | 1,274.6<br>(990.7-1,593.0)           | 8.0<br>(2.7-19.3)                        | 56.9<br>(24.6-96.5)     |
| Yemen        | 4,212.4<br>(3,241.3-5,418.1) | 4,178.9<br>(3,212.2-5,367.7) | 2,229.6<br>(1,140.1-3,425.1)         | 1,949.3<br>(1,126.6-2,891.7)             | 54.9<br>(23.7-94.9)     |

**Supplementary Table 9. Exposure to air pollution among countries in North Africa and Middle East in the 1990-2019 and 2010-2019 periods**

|              |           | Air pollution                |                                      |                                          |                            |                           |
|--------------|-----------|------------------------------|--------------------------------------|------------------------------------------|----------------------------|---------------------------|
|              |           | Particulate matter pollution | Ambient particulate matter pollution | Household air pollution from solid fuels | Ambient ozone pollution    |                           |
| NAME         |           |                              |                                      |                                          |                            |                           |
|              | 1990-2019 | -10.9%<br>(-17.7 to -5.8)    | -10.9%<br>(-18.0 to -5.7)            | 40.1%<br>(25.2 to 63.7)                  | -70.6%<br>(-77.0 to -64.1) | 7.7%<br>(0.7 to 14.3)     |
|              | 2010-2019 | -8.1%<br>(-11.0 to -5.6)     | -8.3%<br>(-11.2 to -5.7)             | -1.4%<br>(-4.1 to 1.3)                   | -37.0%<br>(-44.3 to -29.8) | 8.2%<br>(-0.8 to 14.9)    |
| Afghanistan  | 1990-2019 | -27.1%<br>(-40.6 to -15.9)   | -28.3%<br>(-42.7 to -16.9)           | 178.5%<br>(48.3 to 583.9)                | -46.6%<br>(-57.7 to -33.2) | -3.0%<br>(-15.8 to 25.3)  |
|              | 2010-2019 | -19.8%<br>(-28.4 to -12.4)   | -20.4%<br>(-30.3 to -12.5)           | 76.7%<br>(33.7 to 152.5)                 | -34.9%<br>(-43.4 to -26.8) | 2.8%<br>(-22.3 to 12.4)   |
| Algeria      | 1990-2019 | -2.2%<br>(-12.6 to 5.0)      | -2.4%<br>(-12.8 to 4.9)              | 30.9%<br>(15.2 to 63.7)                  | -98.7%<br>(-99.5 to -96.9) | 10.2%<br>(-22.0 to 32.2)  |
|              | 2010-2019 | 2.3%<br>(0.6 to 3.9)         | 2.2%<br>(0.5 to 3.8)                 | 3.4%<br>(1.6 to 5.1)                     | -74.3%<br>(-83.3 to -62.6) | 4.3%<br>(-22.5 to 17.3)   |
| Bahrain      | 1990-2019 | -5.2%<br>(-16.7 to 7.0)      | -5.7%<br>(-17.1 to 6.5)              | 6.1%<br>(-9.2 to 24.7)                   | -97.0%<br>(-98.8 to -92.9) | 10.9%<br>(-21.1 to 117.7) |
|              | 2010-2019 | -4.6%<br>(-8.2 to -1.2)      | -5.0%<br>(-8.6 to -1.9)              | -4.9%<br>(-8.6 to -1.4)                  | -60.3%<br>(-74.8 to -38.9) | 9.7%<br>(-20.6 to 102.1)  |
| Egypt        | 1990-2019 | -3.5%<br>(-8.3 to -0.1)      | -3.3%<br>(-8.1 to 0.1)               | 19.6%<br>(7.7 to 42.8)                   | -99.5%<br>(-99.8 to -98.7) | -5.3%<br>(-19.4 to 27.4)  |
|              | 2010-2019 | -8.1%<br>(-11.6 to -5.0)     | -8.0%<br>(-11.5 to -4.9)             | -8.8%<br>(-12.6 to -5.3)                 | -75.3%<br>(-84.3 to -62.3) | -3.5%<br>(-14.7 to 29.5)  |
| Iran         | 1990-2019 | -7.0%<br>(-12.9 to -2.7)     | -7.2%<br>(-13.2 to -2.9)             | 18.4%<br>(7.9 to 36.8)                   | -98.8%<br>(-99.5 to -97.0) | 4.6%<br>(-5.0 to 23.2)    |
|              | 2010-2019 | -6.6%<br>(-9.3 to -3.8)      | -7.0%<br>(-9.8 to -4.2)              | -6.6%<br>(-9.3 to -3.6)                  | -70.3%<br>(-81.2 to -55.7) | 15.5%<br>(1.0 to 36.1)    |
| Iraq         | 1990-2019 | -17.8%<br>(-26.6 to -11.3)   | -17.8%<br>(-26.6 to -11.2)           | 28.4%<br>(4.9 to 78.0)                   | -99.3%<br>(-99.7 to -98.4) | 0.1%<br>(-20.1 to 9.8)    |
|              | 2010-2019 | -12.3%<br>(-16.3 to -8.4)    | -12.4%<br>(-16.4 to -8.4)            | -11.0%<br>(-15.3 to -6.2)                | -88.4%<br>(-92.9 to -81.8) | -0.2%<br>(-19.1 to 5.1)   |
| Jordan       | 1990-2019 | 5.2%<br>(-0.4 to 11.6)       | 5.3%<br>(-0.4 to 11.9)               | 9.9%<br>(3.5 to 17.5)                    | -98.5%<br>(-99.4 to -96.2) | -1.3%<br>(-20.1 to 26.1)  |
|              | 2010-2019 | -12.9%<br>(-18.9 to -6.8)    | -12.9%<br>(-18.9 to -6.7)            | -13.4%<br>(-19.5 to -6.9)                | -59.7%<br>(-75.1 to -38.9) | -2.1%<br>(-21.7 to 25.9)  |
| Kuwait       | 1990-2019 | 0.2%<br>(-3.5 to 4.5)        | 0.0%<br>(-3.5 to 4.3)                | 2.8%<br>(-1.9 to 8.4)                    | -97.3%<br>(-99.0 to -94.0) | 0.3%<br>(-20.2 to 35.9)   |
|              | 2010-2019 | -5.3%<br>(-7.5 to -3.2)      | -5.5%<br>(-7.7 to -3.4)              | -5.7%<br>(-8.1 to -3.3)                  | -59.5%<br>(-75.3 to -37.4) | 0.3%<br>(-19.5 to 27.9)   |
| Lebanon      | 1990-2019 | -1.3%<br>(-11.4 to 8.2)      | -0.9%<br>(-10.9 to 8.7)              | 30.7%<br>(14.4 to 57.9)                  | -98.6%<br>(-99.5 to -96.6) | -11.1%<br>(-39.0 to 30.5) |
|              | 2010-2019 | -10.2%<br>(-15.8 to -5.1)    | -10.0%<br>(-15.7 to -5.0)            | -9.4%<br>(-15.2 to -4.0)                 | -74.4%<br>(-84.8 to -62.0) | -11.1%<br>(-41.4 to 30.6) |
| Libya        | 1990-2019 | -15.0%<br>(-28.7 to -5.3)    | -15.1%<br>(-29.0 to -5.4)            | 35.6%<br>(15.5 to 77.4)                  | -99.4%<br>(-99.8 to -98.5) | 10.3%<br>(-23.5 to 32.3)  |
|              | 2010-2019 | -15.2%<br>(-22.1 to -7.8)    | -15.6%<br>(-22.5 to -8.2)            | -16.2%<br>(-23.1 to -8.4)                | -60.2%<br>(-74.6 to -35.9) | 22.2%<br>(-21.1 to 54.7)  |
| Morocco      | 1990-2019 | -10.6%<br>(-26.2 to 4.6)     | -10.7%<br>(-26.6 to 4.2)             | 138.2%<br>(66.2 to 312.0)                | -92.5%<br>(-96.4 to -85.6) | 92.1%<br>(11.1 to 164.8)  |
|              | 2010-2019 | -0.5%<br>(-4.9 to 3.0)       | -0.8%<br>(-5.2 to 2.8)               | 19.0%<br>(10.9 to 33.4)                  | -70.0%<br>(-80.7 to -54.9) | 30.7%<br>(-20.4 to 67.8)  |
| Oman         | 1990-2019 | -22.8%<br>(-37.9 to -10.7)   | -22.7%<br>(-37.6 to -10.8)           | 77.9%<br>(33.3 to 188.1)                 | -99.5%<br>(-99.8 to -98.5) | 12.2%<br>(-23.9 to 33.6)  |
|              | 2010-2019 | 5.8%<br>(0.3 to 11.8)        | 5.7%<br>(0.1 to 11.7)                | 7.5%<br>(1.6 to 13.8)                    | -72.2%<br>(-83.5 to -57.2) | 5.0%<br>(-25.2 to 23.0)   |
| Palestine    | 1990-2019 | -18.8%<br>(-32.9 to -7.3)    | -18.3%<br>(-32.2 to -6.9)            | 93.7%<br>(33.8 to 273.6)                 | -97.9%<br>(-99.1 to -95.0) | -3.5%<br>(-21.9 to 25.2)  |
|              | 2010-2019 | -12.4%<br>(-16.6 to -8.1)    | -12.4%<br>(-16.7 to -8.1)            | -10.1%<br>(-15.0 to -5.0)                | -63.5%<br>(-76.7 to -42.6) | -2.4%<br>(-17.7 to 26.5)  |
| Qatar        | 1990-2019 | -1.2%<br>(-8.0 to 6.2)       | -1.7%<br>(-8.3 to 5.6)               | -1.9%<br>(-9.3 to 6.8)                   | -98.2%<br>(-99.4 to -95.4) | 0.0%<br>(-20.4 to 48.5)   |
|              | 2010-2019 | -1.7%<br>(-3.1 to -0.4)      | -2.1%<br>(-3.5 to -1.0)              | -2.4%<br>(-3.8 to -1.2)                  | -62.7%<br>(-78.4 to -44.1) | -0.7%<br>(-20.2 to 38.2)  |
| Saudi Arabia | 1990-2019 | -9.8%<br>(-24.0 to 4.4)      | -9.7%<br>(-23.8 to 4.4)              | 118.4%<br>(50.2 to 305.8)                | -99.7%<br>(-99.9 to -98.9) | 7.9%<br>(-20.2 to 39.6)   |
|              | 2010-2019 | -1.7%<br>(-4.2 to 0.7)       | -2.0%<br>(-4.4 to 0.4)               | -1.0%<br>(-3.9 to 1.7)                   | -77.5%<br>(-87.4 to -64.2) | 3.8%<br>(-19.2 to 24.0)   |
| Sudan        | 1990-2019 | -43.0%<br>(-57.0 to -28.0)   | -43.1%<br>(-57.9 to -27.6)           | 354.6%<br>(133.7 to 971.9)               | -78.7%<br>(-87.2 to -67.8) | 74.6%<br>(-0.7 to 107.7)  |
|              | 2010-2019 | -20.7%<br>(-32.2 to -10.6)   | -20.7%<br>(-32.1 to -10.6)           | 61.1%<br>(32.9 to 116.4)                 | -54.9%<br>(-66.0 to -42.7) | 75.0%<br>(-0.3 to 109.0)  |
| Syria        | 1990-2019 | -9.2%<br>(-18.1 to 0.4)      | -9.0%<br>(-18.0 to 0.6)              | 10.8%<br>(-4.8 to 36.4)                  | -99.0%<br>(-99.6 to -97.3) | -4.1%<br>(-16.4 to 26.1)  |
|              | 2010-2019 | -11.7%<br>(-16.8 to -6.9)    | -11.6%<br>(-16.7 to -6.8)            | -11.6%<br>(-16.8 to -6.4)                | -63.6%<br>(-76.8 to -46.1) | -3.8%<br>(-16.2 to 26.5)  |
| UAE          | 1990-2019 | -0.3%<br>(-5.9 to 4.5)       | -0.2%<br>(-5.9 to 4.5)               | 0.4%<br>(-5.6 to 5.4)                    | -99.2%<br>(-99.8 to -98.0) | -0.9%<br>(-11.6 to 24.9)  |
|              | 2010-2019 | 0.2%<br>(-2.3 to 2.6)        | 0.3%<br>(-2.2 to 2.7)                | 0.3%<br>(-2.3 to 2.8)                    | -46.4%<br>(-66.4 to -19.0) | -1.2%<br>(-12.1 to 24.6)  |
| Tunisia      | 1990-2019 | -9.9%<br>(-19.9 to -3.3)     | -9.8%<br>(-19.7 to -3.1)             | 25.8%<br>(10.5 to 54.9)                  | -98.9%<br>(-99.6 to -97.4) | -3.1%<br>(-14.2 to 29.0)  |
|              | 2010-2019 | -9.6%<br>(-14.1 to -5.3)     | -9.8%<br>(-14.5 to -5.6)             | -9.5%<br>(-14.1 to -5.1)                 | -68.7%<br>(-79.6 to -54.1) | 8.5%<br>(-24.1 to 30.9)   |
| Turkey       | 1990-2019 | -14.3%<br>(-25.4 to -5.6)    | -14.3%<br>(-25.3 to -5.5)            | 20.4%<br>(5.6 to 47.8)                   | -98.1%<br>(-99.3 to -95.2) | -4.3%<br>(-11.7 to 37.5)  |
|              | 2010-2019 | -10.0%<br>(-15.9 to -4.5)    | -10.2%<br>(-16.1 to -4.6)            | -9.2%<br>(-15.5 to -3.4)                 | -68.1%<br>(-80.7 to -49.4) | 2.8%<br>(-3.4 to 10.7)    |
| Yemen        | 1990-2019 | -42.5%<br>(-59.1 to -27.4)   | -42.6%<br>(-60.4 to -27.0)           | 296.8%<br>(100.3 to 875.8)               | -74.7%<br>(-84.0 to -64.3) | 72.4%<br>(-0.8 to 117.4)  |
|              | 2010-2019 | -12.7%<br>(-22.6 to -5.7)    | -12.8%<br>(-22.7 to -5.9)            | 28.5%<br>(13.0 to 57.6)                  | -36.4%<br>(-51.1 to -21.3) | 55.4%<br>(-9.7 to 91.5)   |

**Supplementary Table 10. Death rates per 100 000 attributable to air pollution and its sub-types among age-groups in countries of North Africa and Middle East in 2019**

|          | Air pollution                |                                      | Ambient ozone pollution                  |                       |                       |
|----------|------------------------------|--------------------------------------|------------------------------------------|-----------------------|-----------------------|
|          | Particulate matter pollution | Ambient particulate matter pollution | Household air pollution from solid fuels |                       |                       |
| Under 5  | 47.3<br>(38.3-58.0)          | 47.3<br>(38.3-58.0)                  | 26.1<br>(19.4-33.9)                      | 21.2<br>(14.0-29.0)   |                       |
| 5 to 9   | 1.1<br>(0.7-1.6)             | 1.1<br>(0.7-1.6)                     | 0.7<br>(0.4-1.0)                         | 0.4<br>(0.2-0.7)      |                       |
| 10 to 14 | 0.7<br>(0.5-1.0)             | 0.7<br>(0.5-1.0)                     | 0.5<br>(0.3-0.7)                         | 0.2<br>(0.1-0.4)      |                       |
| 15 to 19 | 0.6<br>(0.4-0.8)             | 0.6<br>(0.4-0.8)                     | 0.4<br>(0.3-0.6)                         | 0.2<br>(0.1-0.2)      |                       |
| 20 to 24 | 0.6<br>(0.4-0.9)             | 0.6<br>(0.4-0.9)                     | 0.4<br>(0.3-0.7)                         | 0.2<br>(0.1-0.3)      |                       |
| 25 to 29 | 6.9<br>(5.3-8.9)             | 6.8<br>(5.3-8.8)                     | 5.6<br>(4.4-7.2)                         | 1.2<br>(0.7-1.8)      | 0.1<br>(0.0-0.1)      |
| 30 to 34 | 10.3<br>(7.9-13.1)           | 10.2<br>(7.9-13.0)                   | 8.6<br>(6.6-11.1)                        | 1.6<br>(1.0-2.4)      | 0.1<br>(0.1-0.2)      |
| 35 to 39 | 16.6<br>(12.9-21.1)          | 16.4<br>(12.8-20.9)                  | 14.0<br>(10.9-18.1)                      | 2.4<br>(1.5-3.7)      | 0.2<br>(0.1-0.3)      |
| 40 to 44 | 29.9<br>(23.4-37.8)          | 29.6<br>(23.2-37.6)                  | 25.1<br>(19.7-32.1)                      | 4.5<br>(2.9-6.7)      | 0.4<br>(0.2-0.6)      |
| 45 to 49 | 58.8<br>(46.2-73.0)          | 58.3<br>(45.9-72.4)                  | 48.3<br>(37.9-60.4)                      | 10.0<br>(6.4-14.7)    | 0.7<br>(0.3-1.1)      |
| 50 to 54 | 100.0<br>(79.0-123.8)        | 99.0<br>(78.3-123.0)                 | 84.9<br>(66.2-106.6)                     | 14.1<br>(9.2-20.4)    | 1.4<br>(0.6-2.2)      |
| 55 to 59 | 156.3<br>(124.0-193.5)       | 154.5<br>(122.5-192.0)               | 138.7<br>(110.3-171.8)                   | 15.7<br>(10.2-22.8)   | 2.6<br>(1.2-4.2)      |
| 60 to 64 | 249.0<br>(198.5-304.1)       | 245.3<br>(196.4-300.2)               | 224.5<br>(178.8-276.0)                   | 20.8<br>(13.4-30.2)   | 5.3<br>(2.4-8.5)      |
| 65 to 69 | 372.8<br>(302.3-445.8)       | 366.1<br>(295.0-437.9)               | 332.4<br>(267.0-401.7)                   | 33.7<br>(22.0-48.0)   | 9.4<br>(4.3-14.9)     |
| 70 to 74 | 544.5<br>(447.8-647.9)       | 532.4<br>(436.7-634.0)               | 477.6<br>(386.7-578.6)                   | 54.7<br>(35.4-78.0)   | 16.7<br>(7.7-26.9)    |
| 75 to 79 | 818.2<br>(674.6-968.0)       | 797.0<br>(653.5-944.4)               | 716.0<br>(583.9-855.8)                   | 81.1<br>(52.8-116.6)  | 28.9<br>(13.6-46.2)   |
| 80 to 84 | 1,120.0<br>(927.3-1,320.1)   | 1,085.0<br>(892.6-1,280.4)           | 984.1<br>(810.9-1,172.1)                 | 101.0<br>(65.4-146.3) | 47.0<br>(21.7-75.5)   |
| 85 to 89 | 1,572.6<br>(1,270.5-1,882.6) | 1,512.9<br>(1,221.9-1,821.6)         | 1,398.1<br>(1,115.1-1,690.7)             | 114.8<br>(71.7-171.0) | 79.0<br>(37.0-126.1)  |
| 90 to 94 | 1,863.0<br>(1,470.6-2,256.2) | 1,780.3<br>(1,397.7-2,171.7)         | 1,647.2<br>(1,286.6-2,027.1)             | 133.0<br>(80.7-199.3) | 108.9<br>(49.8-177.3) |
| 95 plus  | 2,179.0<br>(1,621.6-2,670.9) | 2,070.9<br>(1,518.4-2,552.5)         | 1,905.7<br>(1,395.5-2,339.3)             | 165.3<br>(96.0-248.6) | 142.2<br>(63.4-231.0) |
| All Ages | 65.5<br>(55.8-76.2)          | 64.2<br>(54.7-74.7)                  | 55.8<br>(46.7-65.1)                      | 8.5<br>(5.8-11.6)     | 1.7<br>(0.8-2.7)      |

**Supplementary Table 11. The number of deaths attributable to air pollution and its sub-types by age-groups among countries in North Africa and Middle East in 2019**

|          | Air pollution                | Particulate matter pollution | Ambient particulate matter pollution | Household air pollution from solid fuels | Ambient ozone pollution  |
|----------|------------------------------|------------------------------|--------------------------------------|------------------------------------------|--------------------------|
| Under 5  | 28,238<br>(22,877-34,632)    | 28,238<br>(22,877-34,632)    | 15,575<br>(11,572-20,265)            | 12,664<br>(8,384-17,339)                 |                          |
| 5 to 9   | 660<br>(438-930)             | 660<br>(438-930)             | 398<br>(255-596)                     | 262<br>(137-421)                         |                          |
| 10 to 14 | 414<br>(283-580)             | 414<br>(283-580)             | 281<br>(185-414)                     | 133<br>(72-211)                          |                          |
| 15 to 19 | 296<br>(201-436)             | 296<br>(201-436)             | 216<br>(138-326)                     | 80<br>(43-132)                           |                          |
| 20 to 24 | 315<br>(209-458)             | 315<br>(209-458)             | 232<br>(151-337)                     | 83<br>(42-137)                           |                          |
| 25 to 29 | 3,585<br>(2,786-4,619)       | 3,557<br>(2,767-4,587)       | 2,937<br>(2,267-3,775)               | 621<br>(383-955)                         | 43<br>(19-69)            |
| 30 to 34 | 5,432<br>(4,197-6,944)       | 5,385<br>(4,153-6,870)       | 4,554<br>(3,488-5,874)               | 831<br>(511-1,279)                       | 70<br>(32-112)           |
| 35 to 39 | 8,111<br>(6,335-10,323)      | 8,043<br>(6,282-10,260)      | 6,854<br>(5,339-8,846)               | 1,189<br>(758-1,795)                     | 99<br>(45-157)           |
| 40 to 44 | 12,287<br>(9,627-15,558)     | 12,187<br>(9,552-15,477)     | 10,321<br>(8,082-13,201)             | 1,866<br>(1,208-2,740)                   | 145<br>(66-235)          |
| 45 to 49 | 19,956<br>(15,669-24,771)    | 19,797<br>(15,565-24,560)    | 16,394<br>(12,850-20,486)            | 3,403<br>(2,164-4,975)                   | 236<br>(104-378)         |
| 50 to 54 | 27,851<br>(22,008-34,482)    | 27,588<br>(21,803-34,272)    | 23,663<br>(18,430-29,697)            | 3,925<br>(2,562-5,692)                   | 383<br>(172-619)         |
| 55 to 59 | 34,597<br>(27,448-42,824)    | 34,192<br>(27,121-42,502)    | 30,707<br>(24,403-38,018)            | 3,484<br>(2,256-5,052)                   | 576<br>(265-929)         |
| 60 to 64 | 42,862<br>(34,156-52,331)    | 42,214<br>(33,797-51,671)    | 38,641<br>(30,775-47,495)            | 3,573<br>(2,305-5,192)                   | 907<br>(418-1,457)       |
| 65 to 69 | 46,570<br>(37,755-55,681)    | 45,727<br>(36,845-54,702)    | 41,515<br>(33,344-50,178)            | 4,212<br>(2,746-5,997)                   | 1,175<br>(532-1,859)     |
| 70 to 74 | 45,743<br>(37,614-54,424)    | 44,723<br>(36,682-53,257)    | 40,124<br>(32,489-48,609)            | 4,599<br>(2,972-6,553)                   | 1,403<br>(649-2,261)     |
| 75 to 79 | 43,790<br>(36,106-51,808)    | 42,657<br>(34,977-50,542)    | 38,317<br>(31,248-45,803)            | 4,339<br>(2,828-6,242)                   | 1,548<br>(726-2,473)     |
| 80 to 84 | 37,809<br>(31,303-44,564)    | 36,628<br>(30,132-43,225)    | 33,220<br>(27,373-39,568)            | 3,408<br>(2,209-4,938)                   | 1,586<br>(734-2,548)     |
| 85 to 89 | 26,612<br>(21,500-31,859)    | 25,601<br>(20,678-30,826)    | 23,659<br>(18,870-28,611)            | 1,943<br>(1,214-2,894)                   | 1,337<br>(626-2,135)     |
| 90 to 94 | 10,412<br>(8,219-12,610)     | 9,950<br>(7,812-12,138)      | 9,207<br>(7,191-11,330)              | 744<br>(451-1,114)                       | 609<br>(278-991)         |
| 95 plus  | 3,019<br>(2,247-3,701)       | 2,870<br>(2,104-3,537)       | 2,641<br>(1,934-3,241)               | 229<br>(133-344)                         | 197<br>(88-320)          |
| All Ages | 398,559<br>(339,434-463,723) | 391,042<br>(332,909-454,990) | 339,456<br>(284,221-396,047)         | 51,586<br>(35,572-70,524)                | 10,315<br>(4,691-16,290) |

**Supplementary Table 12. DALYs rates per 100 000 attributable to air pollution and its sub-types among age-groups in countries of North Africa and Middle East in 2019**

|          | Air pollution                   |                                 | Ambient ozone pollution              |                                          |                          |
|----------|---------------------------------|---------------------------------|--------------------------------------|------------------------------------------|--------------------------|
|          |                                 | Particulate matter pollution    | Ambient particulate matter pollution | Household air pollution from solid fuels |                          |
| Under 5  | 4,193.8<br>(3,399.3-5,138.5)    | 4,193.8<br>(3,399.3-5,138.5)    | 2,315.2<br>(1,721.3-3,011.7)         | 1,878.6<br>(1,244.3-2,572.9)             |                          |
| 5 to 9   | 92.9<br>(61.8-131.0)            | 92.9<br>(61.8-131.0)            | 56.3<br>(36.4-83.8)                  | 36.6<br>(19.2-59.0)                      |                          |
| 10 to 14 | 57.5<br>(39.3-80.6)             | 57.5<br>(39.3-80.6)             | 39.2<br>(26.0-57.2)                  | 18.3<br>(10.0-29.1)                      |                          |
| 15 to 19 | 41.3<br>(28.2-60.5)             | 41.3<br>(28.2-60.5)             | 30.2<br>(19.4-44.7)                  | 11.1<br>(5.9-18.2)                       |                          |
| 20 to 24 | 41.7<br>(28.0-60.3)             | 41.7<br>(28.0-60.3)             | 30.7<br>(20.0-44.5)                  | 11.0<br>(5.7-18.0)                       |                          |
| 25 to 29 | 506.5<br>(405.8-631.3)          | 503.2<br>(403.2-628.0)          | 418.0<br>(332.8-520.7)               | 85.2<br>(54.1-127.3)                     | 5.0<br>(2.2-8.2)         |
| 30 to 34 | 696.8<br>(550.2-862.4)          | 691.7<br>(545.8-857.4)          | 589.7<br>(465.2-732.1)               | 102.0<br>(64.8-153.4)                    | 7.5<br>(3.4-12.0)        |
| 35 to 39 | 1,014.1<br>(811.0-1,243.4)      | 1,007.0<br>(805.1-1,237.8)      | 865.6<br>(691.1-1,075.0)             | 141.3<br>(91.9-208.5)                    | 10.5<br>(4.8-16.6)       |
| 40 to 44 | 1,623.9<br>(1,296.0-2,006.5)    | 1,612.6<br>(1,285.3-1,993.9)    | 1,378.0<br>(1,100.5-1,722.3)         | 234.6<br>(152.8-338.7)                   | 16.5<br>(7.5-26.7)       |
| 45 to 49 | 2,823.8<br>(2,269.7-3,439.6)    | 2,804.1<br>(2,257.5-3,419.6)    | 2,342.2<br>(1,885.4-2,872.8)         | 462.0<br>(302.3-670.1)                   | 29.1<br>(12.8-46.7)      |
| 50 to 54 | 4,249.5<br>(3,407.0-5,168.1)    | 4,214.6<br>(3,386.4-5,131.1)    | 3,635.9<br>(2,869.9-4,469.7)         | 578.7<br>(381.2-829.2)                   | 51.1<br>(22.9-82.4)      |
| 55 to 59 | 5,818.7<br>(4,697.5-7,043.6)    | 5,759.4<br>(4,645.9-6,967.1)    | 5,189.3<br>(4,151.7-6,305.7)         | 570.1<br>(377.3-822.8)                   | 84.4<br>(38.8-136.0)     |
| 60 to 64 | 7,912.6<br>(6,423.2-9,486.1)    | 7,807.8<br>(6,319.7-9,396.5)    | 7,159.8<br>(5,783.5-8,717.6)         | 648.0<br>(424.9-931.4)                   | 146.7<br>(67.6-235.7)    |
| 65 to 69 | 9,939.4<br>(8,113.2-11,780.4)   | 9,781.6<br>(7,999.2-11,642.5)   | 8,889.8<br>(7,286.6-10,633.2)        | 891.8<br>(591.5-1,247.9)                 | 219.9<br>(99.5-348.0)    |
| 70 to 74 | 11,825.5<br>(9,764.3-13,971.5)  | 11,593.5<br>(9,561.0-13,708.1)  | 10,405.2<br>(8,568.9-12,422.2)       | 1,188.4<br>(783.8-1,657.8)               | 319.0<br>(147.4-514.1)   |
| 75 to 79 | 13,937.9<br>(11,510.8-16,380.6) | 13,617.9<br>(11,212.3-16,009.5) | 12,218.6<br>(10,026.4-14,554.2)      | 1,399.2<br>(929.1-1,964.4)               | 437.5<br>(205.1-698.7)   |
| 80 to 84 | 14,598.8<br>(12,156.7-17,155.8) | 14,192.8<br>(11,886.8-16,652.1) | 12,847.9<br>(10,669.2-15,330.0)      | 1,344.9<br>(900.6-1,911.6)               | 545.1<br>(252.4-875.9)   |
| 85 to 89 | 15,472.2<br>(12,591.5-18,400.9) | 14,943.5<br>(12,188.2-17,846.4) | 13,768.0<br>(11,103.4-16,469.4)      | 1,175.5<br>(768.1-1,714.0)               | 699.4<br>(327.4-1,116.3) |
| 90 to 94 | 14,283.0<br>(11,437.9-17,333.0) | 13,715.4<br>(10,979.0-16,649.0) | 12,645.3<br>(10,046.5-15,366.0)      | 1,070.1<br>(682.3-1,546.5)               | 747.7<br>(341.8-1,216.4) |
| 95 plus  | 12,738.3<br>(9,596.9-15,379.4)  | 12,179.5<br>(9,161.2-14,763.8)  | 11,141.0<br>(8,352.7-13,570.6)       | 1,038.5<br>(642.8-1,505.5)               | 735.7<br>(327.4-1,195.2) |
| All Ages | 2,145.0<br>(1,831.0-2,485.2)    | 2,121.5<br>(1,813.9-2,461.1)    | 1,736.4<br>(1,456.5-2,039.7)         | 385.1<br>(265.7-513.5)                   | 32.8<br>(15.0-51.9)      |

**Supplementary Table 13. The number of DALYs attributable to air pollution and its sub-types by age-groups among countries in North Africa and Middle East in 2019**

|          | Air pollution                         |                                       | Particulate matter pollution         |                                          | Ambient ozone pollution     |  |
|----------|---------------------------------------|---------------------------------------|--------------------------------------|------------------------------------------|-----------------------------|--|
|          |                                       |                                       | Ambient particulate matter pollution | Household air pollution from solid fuels |                             |  |
| Under 5  | 2,504,541<br>(2,030,057-3,068,725)    | 2,504,541<br>(2,030,057-3,068,725)    | 1,382,654<br>(1,027,958-1,798,598)   | 1,121,887<br>(743,103-1,536,522)         |                             |  |
| 5 to 9   | 55,286<br>(36,809-77,973)             | 55,286<br>(36,809-77,973)             | 33,519<br>(21,663-49,887)            | 21,767<br>(11,445-35,119)                |                             |  |
| 10 to 14 | 32,517<br>(22,230-45,624)             | 32,517<br>(22,230-45,624)             | 22,160<br>(14,717-32,354)            | 10,357<br>(5,663-16,499)                 |                             |  |
| 15 to 19 | 21,856<br>(14,941-32,040)             | 21,856<br>(14,941-32,040)             | 15,966<br>(10,287-23,696)            | 5,890<br>(3,144-9,623)                   |                             |  |
| 20 to 24 | 21,583<br>(14,466-31,217)             | 21,583<br>(14,466-31,217)             | 15,903<br>(10,328-23,007)            | 5,681<br>(2,946-9,326)                   |                             |  |
| 25 to 29 | 263,868<br>(211,408-328,875)          | 262,163<br>(210,043-327,160)          | 217,788<br>(173,364-271,285)         | 44,375<br>(28,165-66,300)                | 2,629<br>(1,171-4,253)      |  |
| 30 to 34 | 368,361<br>(290,893-455,945)          | 365,669<br>(288,541-453,270)          | 311,770<br>(245,912-387,063)         | 53,899<br>(34,247-81,073)                | 3,980<br>(1,796-6,356)      |  |
| 35 to 39 | 496,684<br>(397,215-609,003)          | 493,186<br>(394,317-606,236)          | 423,968<br>(338,484-526,524)         | 69,218<br>(45,025-102,129)               | 5,127<br>(2,334-8,132)      |  |
| 40 to 44 | 667,581<br>(532,784-824,872)          | 662,930<br>(528,362-819,658)          | 566,477<br>(452,420-708,014)         | 96,454<br>(62,796-139,221)               | 6,772<br>(3,074-10,966)     |  |
| 45 to 49 | 958,126<br>(770,119-1,167,056)        | 951,459<br>(765,967-1,160,267)        | 794,701<br>(639,712-974,749)         | 156,758<br>(102,562-227,353)             | 9,885<br>(4,346-15,842)     |  |
| 50 to 54 | 1,183,864<br>(949,147-1,439,756)      | 1,174,123<br>(943,400-1,429,456)      | 1,012,915<br>(799,518-1,245,196)     | 161,208<br>(106,191-231,016)             | 14,231<br>(6,366-22,966)    |  |
| 55 to 59 | 1,287,837<br>(1,039,689-1,558,935)    | 1,274,706<br>(1,028,274-1,542,011)    | 1,148,536<br>(918,874-1,395,632)     | 126,169<br>(83,513-182,110)              | 18,673<br>(8,579-30,107)    |  |
| 60 to 64 | 1,361,821<br>(1,105,488-1,632,632)    | 1,343,788<br>(1,087,679-1,617,219)    | 1,232,261<br>(995,389-1,500,366)     | 111,527<br>(73,121-160,296)              | 25,247<br>(11,629-40,566)   |  |
| 65 to 69 | 1,241,469<br>(1,013,376-1,471,417)    | 1,221,761<br>(999,132-1,454,197)      | 1,110,375<br>(910,125-1,328,128)     | 111,386<br>(73,876-155,873)              | 27,470<br>(12,427-43,468)   |  |
| 70 to 74 | 993,395<br>(820,248-1,173,668)        | 973,911<br>(803,165-1,151,541)        | 874,084<br>(719,823-1,043,517)       | 99,827<br>(65,846-139,259)               | 26,797<br>(12,386-43,185)   |  |
| 75 to 79 | 745,938<br>(616,042-876,671)          | 728,814<br>(600,071-856,811)          | 653,928<br>(536,603-778,922)         | 74,886<br>(49,722-105,134)               | 23,415<br>(10,975-37,391)   |  |
| 80 to 84 | 492,828<br>(410,389-579,150)          | 479,123<br>(401,276-562,146)          | 433,720<br>(360,174-517,513)         | 45,402<br>(30,403-64,534)                | 18,403<br>(8,521-29,569)    |  |
| 85 to 89 | 261,827<br>(213,078-311,387)          | 252,880<br>(206,253-302,005)          | 232,987<br>(187,897-278,702)         | 19,893<br>(12,999-29,004)                | 11,835<br>(5,540-18,891)    |  |
| 90 to 94 | 79,829<br>(63,927-96,876)             | 76,657<br>(61,362-93,053)             | 70,676<br>(56,151-85,882)            | 5,981<br>(3,813-8,644)                   | 4,179<br>(1,910-6,798)      |  |
| 95 plus  | 17,651<br>(13,298-21,311)             | 16,877<br>(12,695-20,458)             | 15,438<br>(11,574-18,805)            | 1,439<br>(891-2,086)                     | 1,019<br>(454-1,656)        |  |
| All Ages | 13,056,864<br>(11,145,813-15,128,048) | 12,913,831<br>(11,041,330-14,981,099) | 10,569,826<br>(8,866,135-12,416,213) | 2,344,005<br>(1,617,635-3,125,700)       | 199,665<br>(91,412-316,069) |  |



**Supplementary Figure 1.a. Age-standardised death and DALYs rates per 100 000 attributable to air pollution among women in countries of North Africa and Middle East in 1990 and 2019**

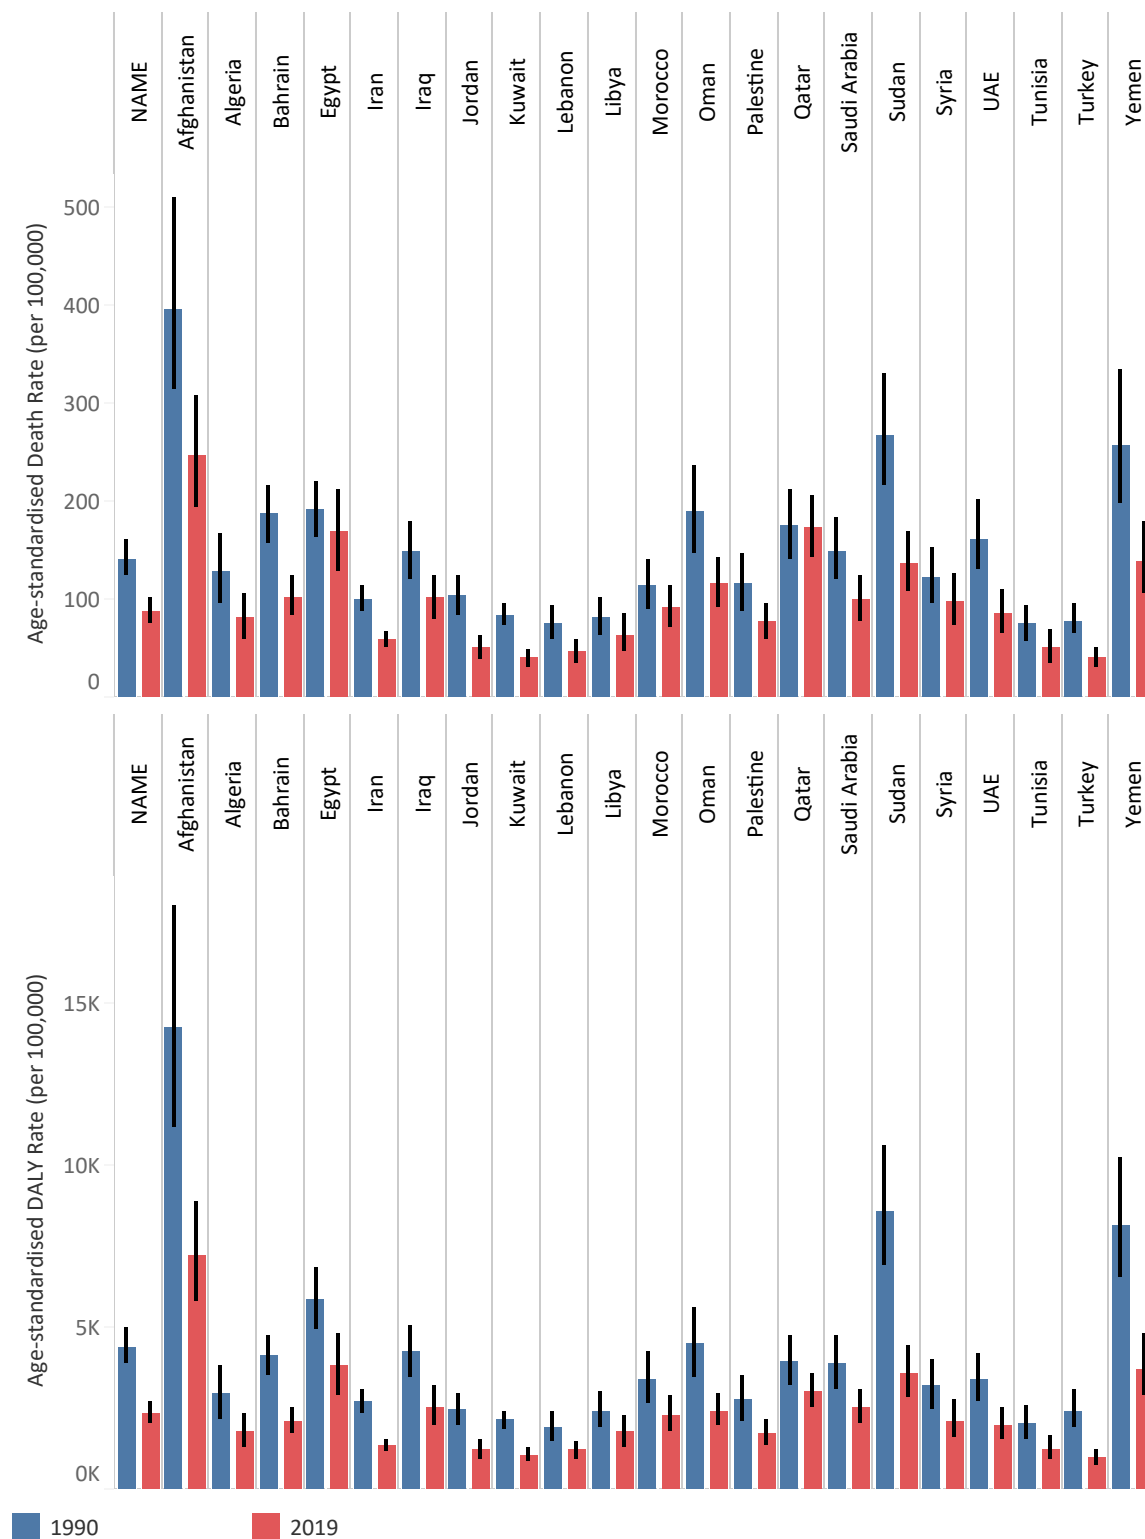

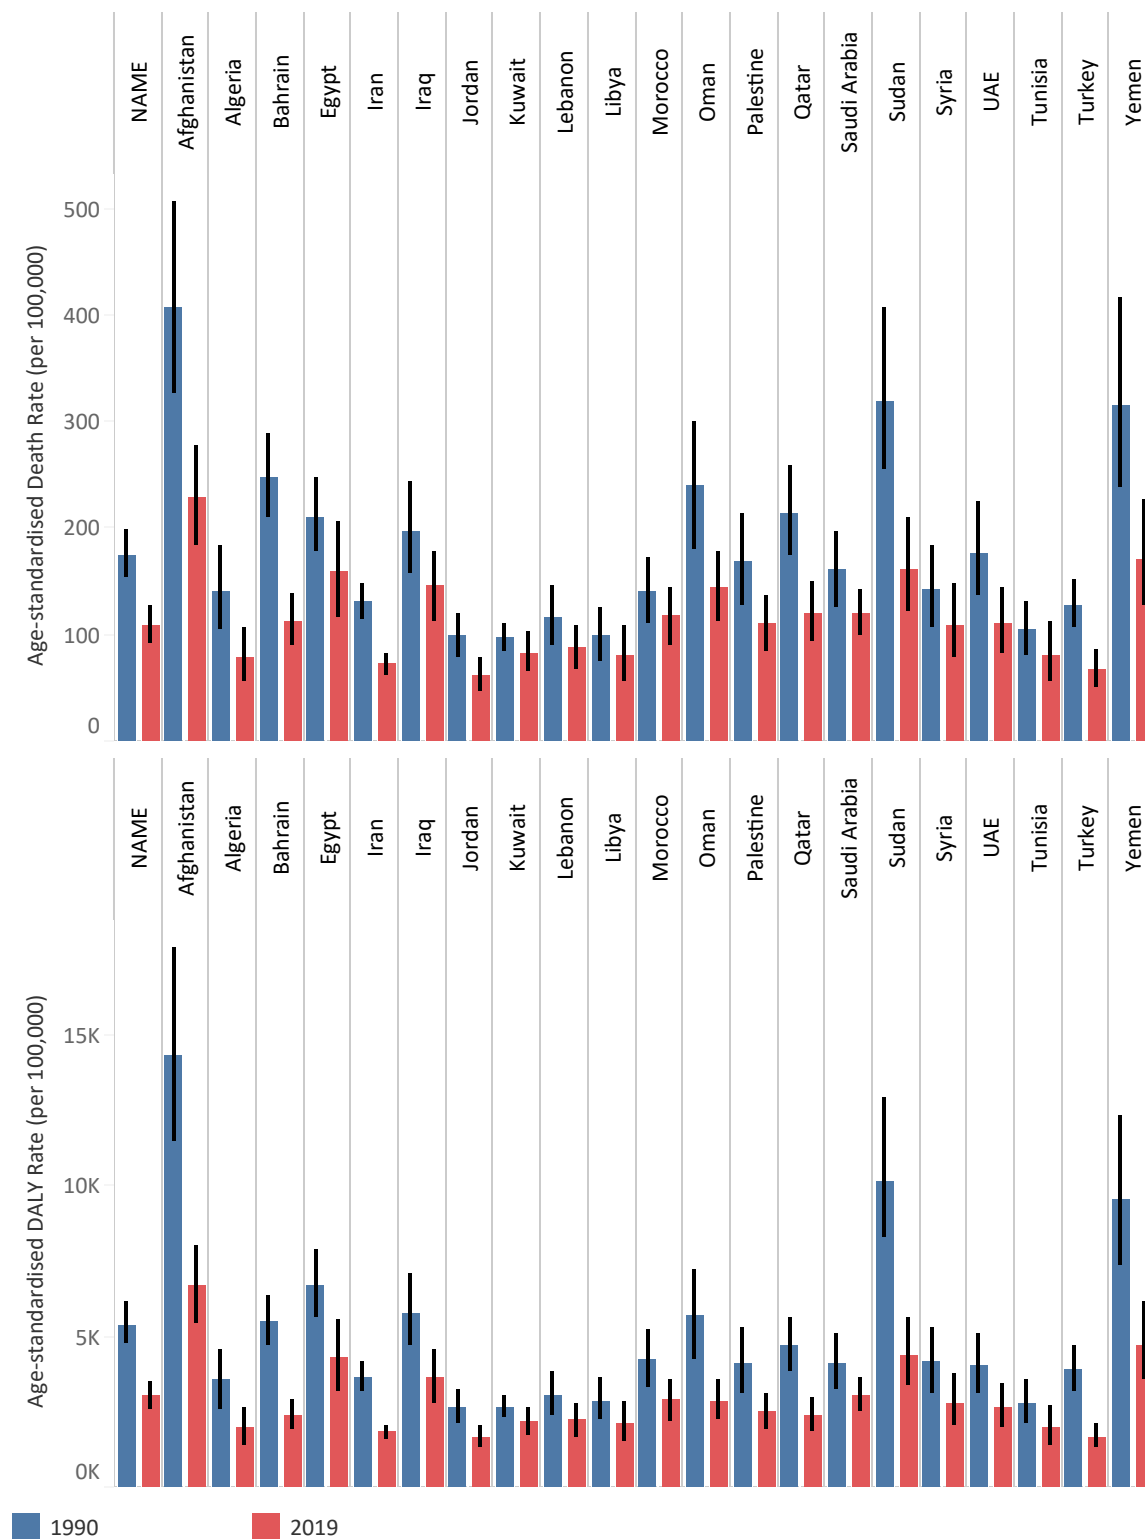

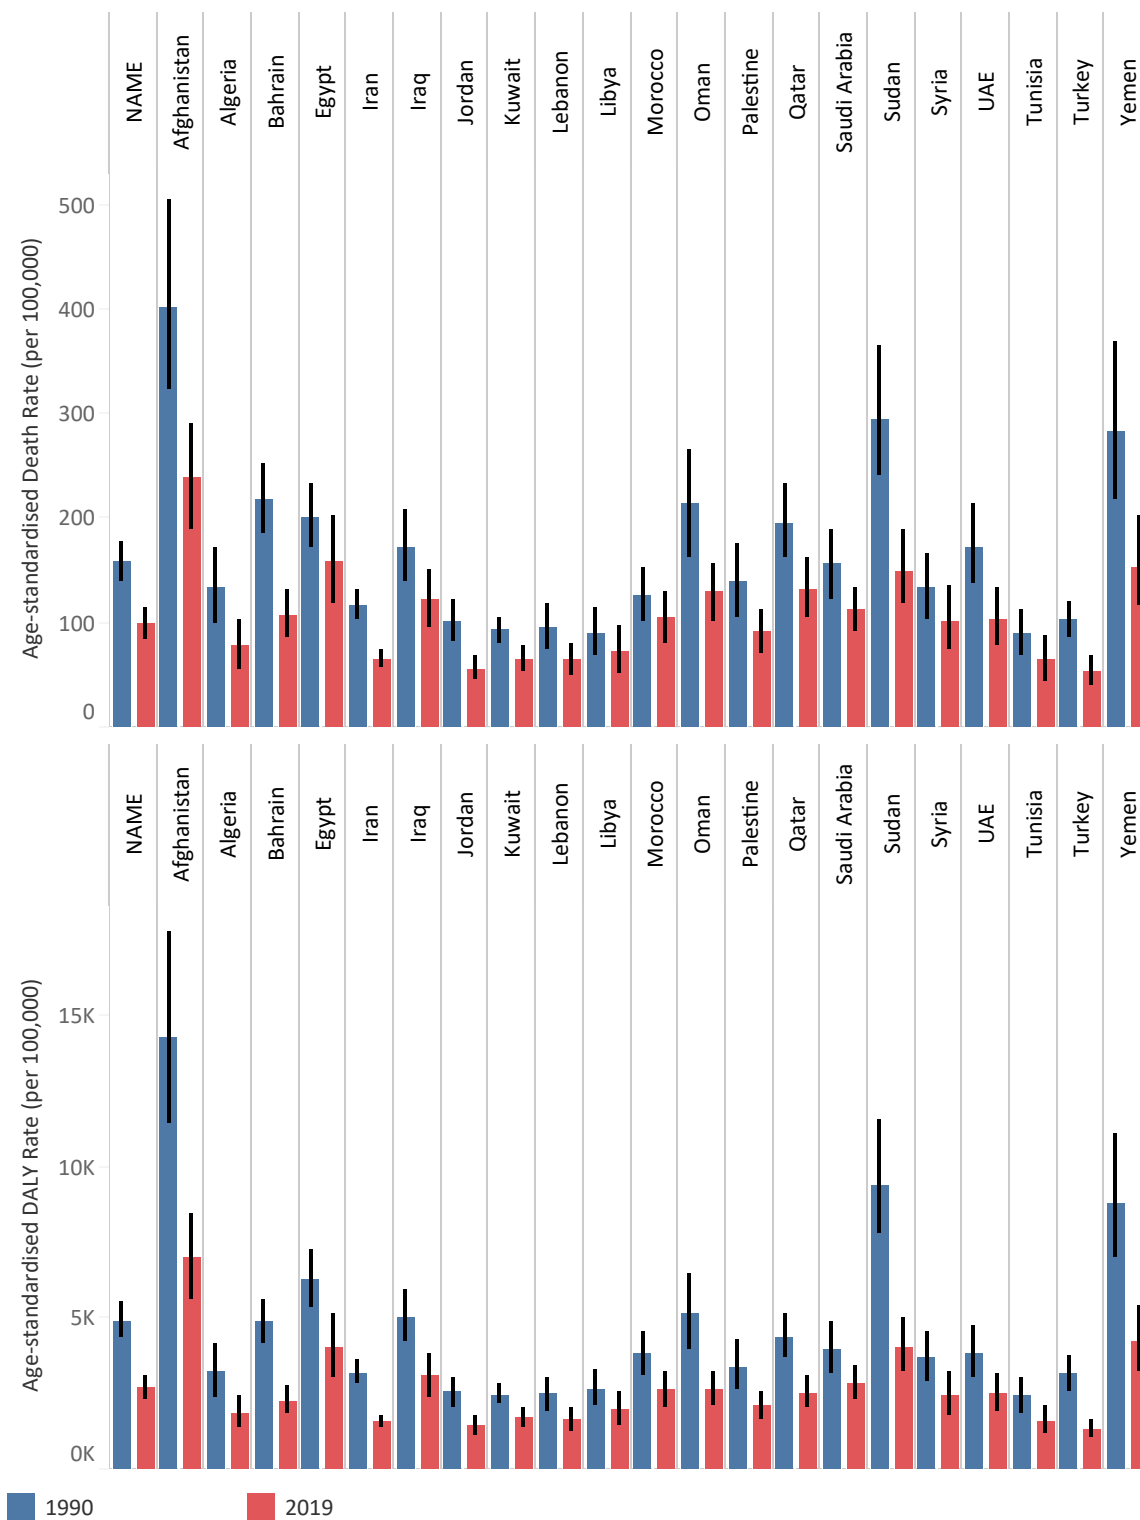

**Supplementary Figure 2.a. Changes in life expectancy by age in North Africa and Middle East in 2019 if air pollution had been lowered to the theoretical minimum risk exposure levels among women**

|              | All Ages      | Under 1       | 1 to 4        | 5 to 9        | 10 to 14      | 15 to 19      | 20 to 24      | 25 to 29      | 30 to 34      | 35 to 39      | 40 to 44      | 45 to 49      | 50 to 54      | 55 to 59       | 60 to 64       | 65 to 69       | 70 to 74       | 75 to 79       | 80 to 84       | 85 plus        |
|--------------|---------------|---------------|---------------|---------------|---------------|---------------|---------------|---------------|---------------|---------------|---------------|---------------|---------------|----------------|----------------|----------------|----------------|----------------|----------------|----------------|
| NAME         | 1.5<br>(3.0%) | 1.6<br>(2.2%) | 1.6<br>(2.2%) | 1.6<br>(2.2%) | 1.6<br>(2.3%) | 1.6<br>(2.5%) | 1.6<br>(2.7%) | 1.6<br>(3.0%) | 1.6<br>(3.2%) | 1.5<br>(3.6%) | 1.5<br>(4.0%) | 1.5<br>(4.4%) | 1.4<br>(4.9%) | 1.4<br>(5.5%)  | 1.3<br>(6.1%)  | 1.2<br>(6.8%)  | 1.0<br>(7.5%)  | 0.8<br>(8.2%)  | 0.7<br>(8.8%)  | 0.5<br>(9.5%)  |
| Afghanistan  | 2.3<br>(4.8%) | 2.4<br>(3.8%) | 2.4<br>(3.8%) | 2.4<br>(3.9%) | 2.4<br>(4.1%) | 2.4<br>(4.5%) | 2.4<br>(5.0%) | 2.4<br>(5.6%) | 2.4<br>(6.2%) | 2.3<br>(6.9%) | 2.3<br>(7.8%) | 2.2<br>(8.7%) | 2.1<br>(9.6%) | 1.9<br>(10.5%) | 1.7<br>(11.4%) | 1.5<br>(12.2%) | 1.3<br>(13.3%) | 1.0<br>(14.1%) | 0.8<br>(14.7%) | 0.6<br>(15.3%) |
| Algeria      | 1.0<br>(2.0%) | 1.0<br>(1.4%) | 1.0<br>(1.4%) | 1.0<br>(1.4%) | 1.0<br>(1.5%) | 1.0<br>(1.6%) | 1.0<br>(1.8%) | 1.0<br>(1.9%) | 1.0<br>(2.1%) | 1.0<br>(2.3%) | 1.0<br>(2.6%) | 1.0<br>(2.8%) | 0.9<br>(3.1%) | 0.9<br>(3.5%)  | 0.8<br>(3.9%)  | 0.7<br>(4.3%)  | 0.6<br>(4.8%)  | 0.5<br>(5.5%)  | 0.4<br>(6.2%)  | 0.3<br>(8.5%)  |
| Bahrain      | 1.4<br>(2.9%) | 1.4<br>(2.0%) | 1.4<br>(2.0%) | 1.4<br>(2.0%) | 1.4<br>(2.1%) | 1.4<br>(2.3%) | 1.4<br>(2.5%) | 1.4<br>(2.7%) | 1.4<br>(3.0%) | 1.4<br>(3.3%) | 1.4<br>(3.7%) | 1.4<br>(4.2%) | 1.4<br>(4.8%) | 1.4<br>(5.6%)  | 1.3<br>(6.5%)  | 1.2<br>(7.6%)  | 1.1<br>(8.8%)  | 0.9<br>(9.9%)  | 0.7<br>(10.9%) | 0.5<br>(12.5%) |
| Egypt        | 1.7<br>(3.6%) | 1.8<br>(2.7%) | 1.8<br>(2.7%) | 1.8<br>(2.7%) | 1.8<br>(2.9%) | 1.8<br>(3.1%) | 1.8<br>(3.4%) | 1.8<br>(3.8%) | 1.8<br>(4.2%) | 1.8<br>(4.6%) | 1.8<br>(5.2%) | 1.7<br>(5.9%) | 1.7<br>(6.7%) | 1.6<br>(7.6%)  | 1.4<br>(8.7%)  | 1.2<br>(9.5%)  | 1.0<br>(10.1%) | 0.8<br>(10.5%) | 0.6<br>(10.8%) | 0.4<br>(11.2%) |
| Iran         | 1.2<br>(2.3%) | 1.2<br>(1.6%) | 1.2<br>(1.6%) | 1.2<br>(1.6%) | 1.2<br>(1.7%) | 1.2<br>(1.9%) | 1.2<br>(2.0%) | 1.2<br>(2.2%) | 1.2<br>(2.4%) | 1.2<br>(2.6%) | 1.2<br>(2.9%) | 1.2<br>(3.3%) | 1.2<br>(3.7%) | 1.1<br>(4.2%)  | 1.1<br>(4.8%)  | 1.0<br>(5.5%)  | 0.9<br>(6.3%)  | 0.8<br>(7.3%)  | 0.7<br>(8.1%)  | 0.5<br>(9.1%)  |
| Iraq         | 1.9<br>(3.5%) | 1.9<br>(2.7%) | 1.9<br>(2.7%) | 1.9<br>(2.7%) | 1.9<br>(2.9%) | 1.9<br>(3.1%) | 1.9<br>(3.4%) | 1.9<br>(3.7%) | 1.9<br>(4.0%) | 1.9<br>(4.5%) | 1.9<br>(5.0%) | 1.9<br>(5.6%) | 1.8<br>(6.2%) | 1.7<br>(7.0%)  | 1.6<br>(7.8%)  | 1.5<br>(8.6%)  | 1.3<br>(9.4%)  | 1.1<br>(10.2%) | 0.9<br>(10.7%) | 0.6<br>(11.5%) |
| Jordan       | 1.0<br>(1.8%) | 1.0<br>(1.3%) | 1.0<br>(1.3%) | 1.0<br>(1.3%) | 1.0<br>(1.4%) | 1.0<br>(1.5%) | 1.0<br>(1.7%) | 1.0<br>(1.8%) | 1.0<br>(2.0%) | 1.0<br>(2.2%) | 1.0<br>(2.4%) | 1.0<br>(2.7%) | 1.0<br>(3.1%) | 0.9<br>(3.5%)  | 0.9<br>(4.1%)  | 0.9<br>(4.7%)  | 0.8<br>(5.2%)  | 0.7<br>(5.8%)  | 0.5<br>(6.5%)  | 0.4<br>(7.4%)  |
| Kuwait       | 1.6<br>(2.8%) | 1.6<br>(2.0%) | 1.6<br>(2.0%) | 1.6<br>(2.0%) | 1.6<br>(2.1%) | 1.6<br>(2.2%) | 1.6<br>(2.4%) | 1.6<br>(2.6%) | 1.6<br>(2.8%) | 1.6<br>(3.1%) | 1.6<br>(3.4%) | 1.6<br>(3.8%) | 1.6<br>(4.2%) | 1.5<br>(4.8%)  | 1.5<br>(5.5%)  | 1.5<br>(6.3%)  | 1.4<br>(7.2%)  | 1.3<br>(8.3%)  | 1.2<br>(9.6%)  | 0.9<br>(11.0%) |
| Lebanon      | 1.0<br>(2.0%) | 1.0<br>(1.4%) | 1.0<br>(1.4%) | 1.0<br>(1.4%) | 1.0<br>(1.5%) | 1.0<br>(1.6%) | 1.0<br>(1.7%) | 1.0<br>(1.9%) | 1.0<br>(2.0%) | 1.0<br>(2.2%) | 1.0<br>(2.5%) | 1.0<br>(2.8%) | 1.0<br>(3.1%) | 0.9<br>(3.5%)  | 0.9<br>(3.9%)  | 0.8<br>(4.4%)  | 0.7<br>(4.9%)  | 0.6<br>(5.4%)  | 0.5<br>(6.0%)  | 0.4<br>(6.7%)  |
| Libya        | 1.5<br>(2.9%) | 1.5<br>(2.0%) | 1.5<br>(2.0%) | 1.5<br>(2.1%) | 1.5<br>(2.2%) | 1.5<br>(2.4%) | 1.5<br>(2.6%) | 1.5<br>(2.8%) | 1.5<br>(3.0%) | 1.5<br>(3.3%) | 1.5<br>(3.7%) | 1.5<br>(4.1%) | 1.4<br>(4.5%) | 1.4<br>(5.1%)  | 1.3<br>(6.2%)  | 1.2<br>(6.8%)  | 1.0<br>(7.5%)  | 0.9<br>(8.2%)  | 0.7<br>(9.1%)  | 0.5<br>(10.5%) |
| Morocco      | 1.4<br>(3.0%) | 1.5<br>(2.1%) | 1.5<br>(2.1%) | 1.5<br>(2.1%) | 1.5<br>(2.2%) | 1.5<br>(2.4%) | 1.5<br>(2.6%) | 1.5<br>(2.9%) | 1.5<br>(3.2%) | 1.5<br>(3.5%) | 1.5<br>(3.9%) | 1.4<br>(4.4%) | 1.4<br>(4.9%) | 1.3<br>(5.5%)  | 1.2<br>(6.2%)  | 1.1<br>(6.8%)  | 0.9<br>(7.4%)  | 0.8<br>(8.0%)  | 0.6<br>(8.4%)  | 0.4<br>(8.9%)  |
| Oman         | 1.6<br>(3.0%) | 1.6<br>(2.2%) | 1.6<br>(2.2%) | 1.6<br>(2.3%) | 1.6<br>(2.4%) | 1.6<br>(2.6%) | 1.6<br>(2.8%) | 1.6<br>(3.1%) | 1.6<br>(3.4%) | 1.6<br>(3.8%) | 1.6<br>(4.3%) | 1.6<br>(4.9%) | 1.5<br>(5.6%) | 1.5<br>(6.6%)  | 1.4<br>(7.6%)  | 1.3<br>(8.8%)  | 1.1<br>(10.0%) | 0.9<br>(10.8%) | 0.7<br>(11.1%) | 0.5<br>(11.1%) |
| Palestine    | 1.2<br>(2.3%) | 1.3<br>(1.7%) | 1.3<br>(1.7%) | 1.3<br>(1.8%) | 1.3<br>(1.9%) | 1.3<br>(2.0%) | 1.3<br>(2.2%) | 1.3<br>(2.4%) | 1.3<br>(2.6%) | 1.2<br>(2.9%) | 1.2<br>(3.3%) | 1.2<br>(3.7%) | 1.2<br>(4.3%) | 1.2<br>(4.9%)  | 1.1<br>(5.7%)  | 1.0<br>(6.6%)  | 0.9<br>(7.5%)  | 0.8<br>(8.2%)  | 0.6<br>(8.5%)  | 0.5<br>(8.9%)  |
| Qatar        | 1.2<br>(2.4%) | 1.2<br>(1.7%) | 1.2<br>(1.7%) | 1.2<br>(1.7%) | 1.2<br>(1.8%) | 1.2<br>(2.0%) | 1.2<br>(2.1%) | 1.2<br>(2.4%) | 1.2<br>(2.6%) | 1.2<br>(2.9%) | 1.2<br>(3.3%) | 1.2<br>(3.7%) | 1.2<br>(4.3%) | 1.1<br>(5.1%)  | 1.1<br>(6.2%)  | 1.0<br>(7.5%)  | 0.9<br>(9.1%)  | 0.7<br>(11.3%) | 0.6<br>(15.4%) | 0.4<br>(17.6%) |
| Saudi Arabia | 1.9<br>(3.7%) | 1.9<br>(2.7%) | 1.9<br>(2.7%) | 1.9<br>(2.7%) | 1.9<br>(2.9%) | 1.9<br>(3.1%) | 1.9<br>(3.4%) | 1.9<br>(3.7%) | 1.9<br>(4.0%) | 1.9<br>(4.5%) | 1.9<br>(4.9%) | 1.8<br>(5.5%) | 1.8<br>(6.1%) | 1.7<br>(6.7%)  | 1.5<br>(7.3%)  | 1.4<br>(7.9%)  | 1.2<br>(8.7%)  | 1.0<br>(9.6%)  | 0.9<br>(10.5%) | 0.6<br>(11.8%) |
| Sudan        | 2.2<br>(4.1%) | 2.2<br>(3.2%) | 2.2<br>(3.2%) | 2.2<br>(3.2%) | 2.2<br>(3.4%) | 2.2<br>(3.7%) | 2.2<br>(4.0%) | 2.2<br>(4.4%) | 2.2<br>(4.8%) | 2.2<br>(5.4%) | 2.2<br>(6.0%) | 2.2<br>(6.7%) | 2.1<br>(7.5%) | 2.0<br>(8.4%)  | 1.8<br>(9.4%)  | 1.7<br>(10.5%) | 1.5<br>(11.7%) | 1.2<br>(12.8%) | 1.0<br>(13.7%) | 0.7<br>(14.2%) |
| Syria        | 1.1<br>(2.3%) | 1.2<br>(1.7%) | 1.2<br>(1.7%) | 1.2<br>(1.7%) | 1.2<br>(1.8%) | 1.2<br>(2.0%) | 1.2<br>(2.1%) | 1.2<br>(2.3%) | 1.2<br>(2.5%) | 1.2<br>(2.8%) | 1.1<br>(3.1%) | 1.1<br>(3.4%) | 1.1<br>(3.8%) | 1.0<br>(4.2%)  | 0.9<br>(4.8%)  | 0.8<br>(5.3%)  | 0.7<br>(5.7%)  | 0.5<br>(6.4%)  | 0.4<br>(6.9%)  | 0.2<br>(7.9%)  |
| Tunisia      | 1.1<br>(2.3%) | 1.2<br>(1.5%) | 1.2<br>(1.5%) | 1.2<br>(1.6%) | 1.2<br>(1.6%) | 1.2<br>(1.8%) | 1.2<br>(1.9%) | 1.2<br>(2.1%) | 1.2<br>(2.3%) | 1.2<br>(2.5%) | 1.1<br>(2.7%) | 1.1<br>(3.1%) | 1.1<br>(3.4%) | 1.1<br>(3.9%)  | 1.0<br>(4.4%)  | 1.0<br>(5.0%)  | 0.9<br>(5.6%)  | 0.8<br>(6.3%)  | 0.6<br>(7.0%)  | 0.5<br>(7.6%)  |
| Turkey       | 0.9<br>(1.9%) | 1.0<br>(1.3%) | 1.0<br>(1.3%) | 1.0<br>(1.3%) | 1.0<br>(1.3%) | 1.0<br>(1.4%) | 1.0<br>(1.6%) | 1.0<br>(1.7%) | 1.0<br>(1.9%) | 1.0<br>(2.0%) | 1.0<br>(2.3%) | 1.0<br>(2.5%) | 0.9<br>(2.9%) | 0.9<br>(3.3%)  | 0.9<br>(3.7%)  | 0.8<br>(4.3%)  | 0.8<br>(5.0%)  | 0.7<br>(5.8%)  | 0.6<br>(6.5%)  | 0.5<br>(7.2%)  |
| UAE          | 1.4<br>(2.8%) | 1.4<br>(1.9%) | 1.4<br>(1.9%) | 1.4<br>(1.9%) | 1.4<br>(2.1%) | 1.4<br>(2.2%) | 1.4<br>(2.4%) | 1.4<br>(2.6%) | 1.4<br>(2.9%) | 1.4<br>(3.2%) | 1.4<br>(3.6%) | 1.3<br>(4.0%) | 1.3<br>(4.6%) | 1.3<br>(5.3%)  | 1.2<br>(6.0%)  | 1.1<br>(6.9%)  | 1.0<br>(7.7%)  | 0.9<br>(8.8%)  | 0.8<br>(10.5%) | 0.6<br>(11.4%) |
| Yemen        | 2.0<br>(3.8%) | 2.0<br>(3.0%) | 2.0<br>(3.0%) | 2.0<br>(3.0%) | 2.0<br>(3.2%) | 2.0<br>(3.5%) | 2.0<br>(3.8%) | 2.1<br>(4.2%) | 2.1<br>(4.6%) | 2.1<br>(5.1%) | 2.0<br>(5.7%) | 2.0<br>(6.4%) | 1.9<br>(7.1%) | 1.8<br>(7.9%)  | 1.7<br>(8.8%)  | 1.5<br>(9.8%)  | 1.3<br>(10.7%) | 1.1<br>(11.6%) | 0.9<br>(12.5%) | 0.6<br>(12.9%) |

Supplementary Figure 4.b. Ej cpi gu'lp'ihg'gzrgwpef'd{'ci g'lp'Pqt vj "Chlec"cpf "Of f ng"Gcuw'lp"423; 'H'ck'r qmwkp"j cf "dggp" ny gtgf 'v'vj g'vj gqt gvecnb lplo wo 'tkmhzr qwt g'gxgni'co qpi 'b gp

|              | All Ages      | Under 1       | 1 to 4        | 5 to 9        | 10 to 14      | 15 to 19      | 20 to 24      | 25 to 29      | 30 to 34      | 35 to 39      | 40 to 44      | 45 to 49      | 50 to 54      | 55 to 59       | 60 to 64       | 65 to 69       | 70 to 74       | 75 to 79       | 80 to 84       | 85 plus        |
|--------------|---------------|---------------|---------------|---------------|---------------|---------------|---------------|---------------|---------------|---------------|---------------|---------------|---------------|----------------|----------------|----------------|----------------|----------------|----------------|----------------|
| NAME         | 1.7<br>(3.6%) | 1.8<br>(2.6%) | 1.8<br>(2.6%) | 1.8<br>(2.6%) | 1.8<br>(2.8%) | 1.8<br>(3.0%) | 1.8<br>(3.3%) | 1.8<br>(3.6%) | 1.8<br>(3.9%) | 1.8<br>(4.4%) | 1.8<br>(4.9%) | 1.7<br>(5.4%) | 1.6<br>(6.1%) | 1.5<br>(6.7%)  | 1.4<br>(7.3%)  | 1.2<br>(7.8%)  | 1.1<br>(8.3%)  | 0.9<br>(8.7%)  | 0.7<br>(8.9%)  | 0.5<br>(9.5%)  |
| Afghanistan  | 2.3<br>(4.6%) | 2.3<br>(3.7%) | 2.3<br>(3.7%) | 2.3<br>(3.8%) | 2.3<br>(4.0%) | 2.3<br>(4.4%) | 2.3<br>(4.8%) | 2.3<br>(5.3%) | 2.3<br>(5.9%) | 2.3<br>(6.7%) | 2.3<br>(7.5%) | 2.2<br>(8.4%) | 2.1<br>(9.3%) | 1.9<br>(10.1%) | 1.7<br>(11.0%) | 1.5<br>(11.7%) | 1.2<br>(12.4%) | 1.0<br>(12.9%) | 0.8<br>(13.6%) | 0.6<br>(14.7%) |
| Algeria      | 1.2<br>(2.4%) | 1.3<br>(1.8%) | 1.3<br>(1.8%) | 1.3<br>(1.8%) | 1.3<br>(1.9%) | 1.3<br>(2.0%) | 1.3<br>(2.2%) | 1.3<br>(2.4%) | 1.3<br>(2.6%) | 1.3<br>(2.9%) | 1.2<br>(3.2%) | 1.2<br>(3.6%) | 1.2<br>(3.9%) | 1.1<br>(4.3%)  | 1.0<br>(4.8%)  | 0.9<br>(5.2%)  | 0.8<br>(5.7%)  | 0.6<br>(6.3%)  | 0.5<br>(7.0%)  | 0.4<br>(8.8%)  |
| Bahrain      | 1.5<br>(3.5%) | 1.5<br>(2.1%) | 1.5<br>(2.1%) | 1.5<br>(2.2%) | 1.5<br>(2.3%) | 1.5<br>(2.5%) | 1.6<br>(2.7%) | 1.6<br>(3.0%) | 1.6<br>(3.2%) | 1.5<br>(3.6%) | 1.5<br>(4.0%) | 1.5<br>(4.5%) | 1.5<br>(5.1%) | 1.4<br>(5.9%)  | 1.3<br>(6.8%)  | 1.2<br>(8.0%)  | 1.1<br>(9.5%)  | 0.9<br>(10.8%) | 0.7<br>(11.6%) | 0.6<br>(12.7%) |
| Egypt        | 2.2<br>(4.7%) | 2.3<br>(3.5%) | 2.3<br>(3.5%) | 2.3<br>(3.5%) | 2.3<br>(3.7%) | 2.3<br>(4.1%) | 2.3<br>(4.4%) | 2.3<br>(4.9%) | 2.3<br>(5.4%) | 2.2<br>(6.0%) | 2.2<br>(6.7%) | 2.1<br>(7.6%) | 2.0<br>(8.5%) | 1.9<br>(9.3%)  | 1.7<br>(10.0%) | 1.5<br>(10.4%) | 1.2<br>(10.5%) | 1.0<br>(10.8%) | 0.8<br>(10.6%) | 0.6<br>(10.8%) |
| Iran         | 1.4<br>(2.9%) | 1.4<br>(2.0%) | 1.4<br>(2.0%) | 1.4<br>(2.0%) | 1.4<br>(2.2%) | 1.5<br>(2.3%) | 1.5<br>(2.5%) | 1.5<br>(2.8%) | 1.5<br>(3.0%) | 1.5<br>(3.3%) | 1.4<br>(3.7%) | 1.4<br>(4.1%) | 1.4<br>(4.6%) | 1.3<br>(5.1%)  | 1.2<br>(5.6%)  | 1.1<br>(6.1%)  | 1.0<br>(6.8%)  | 0.8<br>(7.5%)  | 0.7<br>(8.1%)  | 0.5<br>(9.1%)  |
| Iraq         | 2.0<br>(4.1%) | 2.1<br>(3.1%) | 2.1<br>(3.1%) | 2.1<br>(3.1%) | 2.1<br>(3.3%) | 2.1<br>(3.6%) | 2.1<br>(3.9%) | 2.1<br>(4.4%) | 2.1<br>(4.8%) | 2.1<br>(5.4%) | 2.1<br>(6.1%) | 2.0<br>(6.9%) | 2.0<br>(7.7%) | 1.8<br>(8.6%)  | 1.7<br>(9.4%)  | 1.5<br>(10.2%) | 1.2<br>(10.7%) | 1.0<br>(11.0%) | 0.8<br>(11.0%) | 0.5<br>(11.2%) |
| Jordan       | 1.3<br>(2.4%) | 1.3<br>(1.8%) | 1.3<br>(1.8%) | 1.3<br>(1.8%) | 1.3<br>(1.9%) | 1.3<br>(2.1%) | 1.3<br>(2.3%) | 1.3<br>(2.5%) | 1.3<br>(2.7%) | 1.3<br>(3.0%) | 1.3<br>(3.3%) | 1.3<br>(3.7%) | 1.3<br>(4.1%) | 1.2<br>(4.6%)  | 1.1<br>(5.1%)  | 1.0<br>(5.6%)  | 0.9<br>(6.1%)  | 0.8<br>(6.6%)  | 0.6<br>(7.0%)  | 0.5<br>(7.3%)  |
| Kuwait       | 2.1<br>(4.1%) | 2.1<br>(2.8%) | 2.1<br>(2.8%) | 2.1<br>(2.9%) | 2.1<br>(3.0%) | 2.1<br>(3.3%) | 2.1<br>(3.5%) | 2.1<br>(3.8%) | 2.1<br>(4.2%) | 2.1<br>(4.6%) | 2.1<br>(5.0%) | 2.0<br>(5.5%) | 2.0<br>(6.1%) | 1.9<br>(6.7%)  | 1.7<br>(7.4%)  | 1.6<br>(8.2%)  | 1.4<br>(9.2%)  | 1.3<br>(10.2%) | 1.1<br>(11.3%) | 0.9<br>(13.0%) |
| Lebanon      | 1.3<br>(2.8%) | 1.4<br>(2.0%) | 1.4<br>(2.0%) | 1.4<br>(2.0%) | 1.4<br>(2.1%) | 1.4<br>(2.3%) | 1.4<br>(2.5%) | 1.4<br>(2.8%) | 1.4<br>(3.1%) | 1.4<br>(3.4%) | 1.4<br>(3.8%) | 1.3<br>(4.2%) | 1.3<br>(4.6%) | 1.2<br>(5.1%)  | 1.1<br>(5.6%)  | 0.9<br>(6.0%)  | 0.8<br>(6.5%)  | 0.6<br>(6.9%)  | 0.5<br>(7.1%)  | 0.4<br>(7.5%)  |
| Libya        | 1.5<br>(3.2%) | 1.6<br>(2.3%) | 1.6<br>(2.3%) | 1.6<br>(2.3%) | 1.6<br>(2.4%) | 1.6<br>(2.6%) | 1.6<br>(2.8%) | 1.6<br>(3.1%) | 1.6<br>(3.4%) | 1.6<br>(3.7%) | 1.6<br>(4.1%) | 1.5<br>(4.6%) | 1.5<br>(5.1%) | 1.4<br>(5.7%)  | 1.3<br>(6.3%)  | 1.2<br>(6.8%)  | 1.0<br>(7.4%)  | 0.9<br>(7.8%)  | 0.7<br>(8.0%)  | 0.5<br>(8.7%)  |
| Morocco      | 1.6<br>(3.4%) | 1.6<br>(2.4%) | 1.6<br>(2.4%) | 1.6<br>(2.4%) | 1.6<br>(2.6%) | 1.6<br>(2.8%) | 1.6<br>(3.0%) | 1.6<br>(3.3%) | 1.6<br>(3.7%) | 1.6<br>(4.1%) | 1.6<br>(4.6%) | 1.6<br>(5.2%) | 1.5<br>(5.9%) | 1.4<br>(6.6%)  | 1.3<br>(7.3%)  | 1.1<br>(8.0%)  | 1.0<br>(8.5%)  | 0.8<br>(9.0%)  | 0.6<br>(9.2%)  | 0.4<br>(9.6%)  |
| Oman         | 1.5<br>(3.1%) | 1.5<br>(2.2%) | 1.5<br>(2.2%) | 1.5<br>(2.2%) | 1.5<br>(2.3%) | 1.5<br>(2.5%) | 1.5<br>(2.7%) | 1.5<br>(3.0%) | 1.5<br>(3.3%) | 1.5<br>(3.7%) | 1.5<br>(4.2%) | 1.5<br>(4.8%) | 1.4<br>(5.5%) | 1.4<br>(6.4%)  | 1.3<br>(7.5%)  | 1.2<br>(8.8%)  | 1.0<br>(9.7%)  | 0.8<br>(11.0%) | 0.6<br>(12.6%) | 0.4<br>(11.3%) |
| Palestine    | 1.4<br>(2.7%) | 1.4<br>(2.1%) | 1.4<br>(2.1%) | 1.4<br>(2.1%) | 1.4<br>(2.2%) | 1.4<br>(2.4%) | 1.4<br>(2.6%) | 1.4<br>(2.9%) | 1.4<br>(3.2%) | 1.4<br>(3.6%) | 1.4<br>(4.0%) | 1.4<br>(4.5%) | 1.3<br>(5.1%) | 1.3<br>(5.8%)  | 1.1<br>(6.4%)  | 1.0<br>(6.9%)  | 0.8<br>(7.5%)  | 0.7<br>(8.0%)  | 0.5<br>(8.0%)  | 0.4<br>(8.5%)  |
| Qatar        | 1.3<br>(2.8%) | 1.3<br>(1.8%) | 1.3<br>(1.8%) | 1.3<br>(1.9%) | 1.3<br>(2.0%) | 1.3<br>(2.1%) | 1.3<br>(2.3%) | 1.3<br>(2.5%) | 1.3<br>(2.8%) | 1.3<br>(3.1%) | 1.3<br>(3.5%) | 1.3<br>(3.9%) | 1.3<br>(4.4%) | 1.2<br>(5.1%)  | 1.2<br>(5.9%)  | 1.1<br>(7.0%)  | 1.0<br>(8.5%)  | 0.8<br>(10.1%) | 0.7<br>(12.2%) | 0.5<br>(13.6%) |
| Saudi Arabia | 2.0<br>(4.4%) | 2.0<br>(3.0%) | 2.0<br>(3.0%) | 2.0<br>(3.0%) | 2.0<br>(3.2%) | 2.0<br>(3.5%) | 2.0<br>(3.8%) | 2.1<br>(4.2%) | 2.1<br>(4.6%) | 2.1<br>(5.1%) | 2.0<br>(5.7%) | 2.0<br>(6.4%) | 1.9<br>(7.0%) | 1.8<br>(7.7%)  | 1.6<br>(8.4%)  | 1.4<br>(8.9%)  | 1.2<br>(9.4%)  | 1.0<br>(10.0%) | 0.8<br>(10.5%) | 0.6<br>(11.4%) |
| Sudan        | 2.2<br>(4.3%) | 2.2<br>(3.3%) | 2.2<br>(3.3%) | 2.2<br>(3.4%) | 2.2<br>(3.6%) | 2.3<br>(3.9%) | 2.3<br>(4.3%) | 2.3<br>(4.7%) | 2.3<br>(5.2%) | 2.2<br>(5.7%) | 2.2<br>(6.4%) | 2.1<br>(7.1%) | 2.0<br>(7.9%) | 1.9<br>(8.8%)  | 1.7<br>(9.7%)  | 1.5<br>(10.6%) | 1.3<br>(11.5%) | 1.1<br>(12.2%) | 0.9<br>(12.9%) | 0.6<br>(13.6%) |
| Syria        | 1.5<br>(3.3%) | 1.6<br>(2.4%) | 1.6<br>(2.4%) | 1.6<br>(2.4%) | 1.6<br>(2.6%) | 1.6<br>(2.8%) | 1.6<br>(3.0%) | 1.6<br>(3.3%) | 1.6<br>(3.6%) | 1.6<br>(4.0%) | 1.6<br>(4.5%) | 1.5<br>(5.0%) | 1.4<br>(5.5%) | 1.3<br>(6.0%)  | 1.2<br>(6.5%)  | 1.0<br>(6.7%)  | 0.8<br>(6.9%)  | 0.7<br>(7.3%)  | 0.5<br>(7.6%)  | 0.4<br>(8.1%)  |
| Tunisia      | 1.3<br>(2.8%) | 1.4<br>(1.9%) | 1.4<br>(1.9%) | 1.4<br>(2.0%) | 1.4<br>(2.1%) | 1.4<br>(2.3%) | 1.4<br>(2.5%) | 1.4<br>(2.7%) | 1.4<br>(3.0%) | 1.4<br>(3.3%) | 1.4<br>(3.6%) | 1.3<br>(4.0%) | 1.3<br>(4.5%) | 1.2<br>(5.0%)  | 1.1<br>(5.5%)  | 1.0<br>(6.1%)  | 0.9<br>(6.7%)  | 0.7<br>(7.3%)  | 0.6<br>(8.0%)  | 0.4<br>(8.4%)  |
| Turkey       | 1.3<br>(2.7%) | 1.3<br>(1.8%) | 1.3<br>(1.8%) | 1.3<br>(1.9%) | 1.3<br>(2.0%) | 1.3<br>(2.1%) | 1.3<br>(2.3%) | 1.3<br>(2.5%) | 1.3<br>(2.8%) | 1.3<br>(3.1%) | 1.3<br>(3.4%) | 1.3<br>(3.8%) | 1.3<br>(4.3%) | 1.2<br>(4.8%)  | 1.1<br>(5.3%)  | 1.0<br>(5.8%)  | 0.9<br>(6.4%)  | 0.8<br>(6.8%)  | 0.6<br>(7.0%)  | 0.5<br>(7.7%)  |
| UAE          | 1.5<br>(3.8%) | 1.6<br>(2.3%) | 1.6<br>(2.3%) | 1.6<br>(2.3%) | 1.6<br>(2.5%) | 1.6<br>(2.7%) | 1.6<br>(2.9%) | 1.6<br>(3.2%) | 1.6<br>(3.6%) | 1.6<br>(4.0%) | 1.6<br>(4.5%) | 1.5<br>(5.0%) | 1.5<br>(5.6%) | 1.4<br>(6.3%)  | 1.3<br>(7.0%)  | 1.1<br>(7.7%)  | 1.0<br>(8.4%)  | 0.8<br>(9.5%)  | 0.7<br>(10.0%) | 0.5<br>(10.9%) |
| Yemen        | 2.0<br>(4.1%) | 2.0<br>(3.2%) | 2.0<br>(3.2%) | 2.0<br>(3.2%) | 2.0<br>(3.4%) | 2.0<br>(3.7%) | 2.1<br>(4.1%) | 2.1<br>(4.6%) | 2.1<br>(5.1%) | 2.1<br>(5.6%) | 2.1<br>(6.3%) | 2.1<br>(7.1%) | 2.0<br>(7.9%) | 1.9<br>(8.7%)  | 1.6<br>(9.5%)  | 1.4<br>(10.2%) | 1.2<br>(10.9%) | 1.0<br>(11.4%) | 0.8<br>(12.0%) | 0.6<br>(12.5%) |

Supplementary Figure 4.c. Ej cpi gu'lp'ndg'gzrgewcpe{ 'd{ 'ci g'lp'P qt vj 'Ch'kec'cpf 'O k f ig'Gcu'lp'423; 'H'ck' 'r qmwkqp'j cf 'dggp'hqy gt gf 'vq'vj g'vj ggt gveclb lpo wo " t kndzr qwt g'lgxgn'co qpi 'both sexes

|              | All Ages      | Under 1       | 1 to 4        | 5 to 9        | 10 to 14      | 15 to 19      | 20 to 24      | 25 to 29      | 30 to 34      | 35 to 39      | 40 to 44      | 45 to 49      | 50 to 54      | 55 to 59       | 60 to 64       | 65 to 69       | 70 to 74       | 75 to 79       | 80 to 84       | 85 plus        |
|--------------|---------------|---------------|---------------|---------------|---------------|---------------|---------------|---------------|---------------|---------------|---------------|---------------|---------------|----------------|----------------|----------------|----------------|----------------|----------------|----------------|
| NAME         | 1.6<br>(3.3%) | 1.7<br>(2.4%) | 1.7<br>(2.4%) | 1.7<br>(2.4%) | 1.7<br>(2.6%) | 1.7<br>(2.8%) | 1.7<br>(3.0%) | 1.7<br>(3.3%) | 1.7<br>(3.6%) | 1.7<br>(4.0%) | 1.7<br>(4.5%) | 1.6<br>(5.0%) | 1.6<br>(5.5%) | 1.5<br>(6.1%)  | 1.3<br>(6.7%)  | 1.2<br>(7.3%)  | 1.0<br>(7.9%)  | 0.9<br>(8.4%)  | 0.7<br>(8.8%)  | 0.5<br>(9.5%)  |
| Afghanistan  | 2.3<br>(4.7%) | 2.3<br>(3.8%) | 2.3<br>(3.8%) | 2.3<br>(3.8%) | 2.3<br>(4.0%) | 2.3<br>(4.4%) | 2.3<br>(4.9%) | 2.3<br>(5.4%) | 2.3<br>(6.1%) | 2.3<br>(6.8%) | 2.3<br>(7.6%) | 2.2<br>(8.6%) | 2.1<br>(9.4%) | 1.9<br>(10.3%) | 1.7<br>(11.2%) | 1.5<br>(12.0%) | 1.3<br>(12.9%) | 1.0<br>(13.7%) | 0.8<br>(14.2%) | 0.6<br>(15.0%) |
| Algeria      | 1.1<br>(2.2%) | 1.2<br>(1.6%) | 1.2<br>(1.6%) | 1.2<br>(1.6%) | 1.2<br>(1.7%) | 1.2<br>(1.9%) | 1.2<br>(2.0%) | 1.2<br>(2.2%) | 1.2<br>(2.4%) | 1.2<br>(2.6%) | 1.1<br>(2.9%) | 1.1<br>(3.2%) | 1.1<br>(3.6%) | 1.0<br>(4.0%)  | 0.9<br>(4.4%)  | 0.8<br>(4.8%)  | 0.7<br>(5.3%)  | 0.6<br>(5.9%)  | 0.5<br>(6.7%)  | 0.3<br>(9.1%)  |
| Bahrain      | 1.5<br>(3.2%) | 1.5<br>(2.1%) | 1.5<br>(2.1%) | 1.5<br>(2.1%) | 1.5<br>(2.2%) | 1.5<br>(2.4%) | 1.5<br>(2.6%) | 1.5<br>(2.9%) | 1.5<br>(3.1%) | 1.5<br>(3.5%) | 1.5<br>(3.9%) | 1.5<br>(4.4%) | 1.4<br>(5.0%) | 1.4<br>(5.7%)  | 1.3<br>(6.7%)  | 1.2<br>(7.8%)  | 1.1<br>(9.1%)  | 0.9<br>(10.3%) | 0.7<br>(11.2%) | 0.5<br>(12.6%) |
| Egypt        | 2.0<br>(4.2%) | 2.1<br>(3.1%) | 2.1<br>(3.1%) | 2.1<br>(3.2%) | 2.1<br>(3.4%) | 2.1<br>(3.6%) | 2.1<br>(4.0%) | 2.1<br>(4.4%) | 2.1<br>(4.8%) | 2.0<br>(5.4%) | 2.0<br>(6.0%) | 2.0<br>(6.8%) | 1.9<br>(7.7%) | 1.8<br>(8.6%)  | 1.6<br>(9.5%)  | 1.4<br>(10.1%) | 1.1<br>(10.6%) | 0.9<br>(11.0%) | 0.7<br>(11.3%) | 0.5<br>(11.2%) |
| Iran         | 1.3<br>(2.6%) | 1.3<br>(1.8%) | 1.3<br>(1.8%) | 1.3<br>(1.8%) | 1.3<br>(2.0%) | 1.3<br>(2.1%) | 1.3<br>(2.3%) | 1.4<br>(2.5%) | 1.3<br>(2.7%) | 1.3<br>(3.0%) | 1.3<br>(3.3%) | 1.3<br>(3.7%) | 1.3<br>(4.1%) | 1.2<br>(4.6%)  | 1.1<br>(5.2%)  | 1.1<br>(5.8%)  | 0.9<br>(6.5%)  | 0.8<br>(7.4%)  | 0.7<br>(8.1%)  | 0.5<br>(9.1%)  |
| Iraq         | 2.0<br>(3.9%) | 2.0<br>(2.9%) | 2.0<br>(2.9%) | 2.0<br>(3.0%) | 2.0<br>(3.1%) | 2.0<br>(3.4%) | 2.0<br>(3.7%) | 2.1<br>(4.1%) | 2.1<br>(4.5%) | 2.0<br>(5.0%) | 2.0<br>(5.6%) | 2.0<br>(6.3%) | 1.9<br>(7.1%) | 1.8<br>(7.9%)  | 1.7<br>(8.7%)  | 1.5<br>(9.4%)  | 1.3<br>(10.1%) | 1.0<br>(10.6%) | 0.8<br>(10.9%) | 0.6<br>(11.4%) |
| Jordan       | 1.2<br>(2.1%) | 1.2<br>(1.6%) | 1.2<br>(1.6%) | 1.2<br>(1.6%) | 1.2<br>(1.7%) | 1.2<br>(1.8%) | 1.2<br>(2.0%) | 1.2<br>(2.2%) | 1.2<br>(2.4%) | 1.2<br>(2.6%) | 1.2<br>(2.9%) | 1.2<br>(3.3%) | 1.1<br>(3.7%) | 1.1<br>(4.1%)  | 1.0<br>(4.6%)  | 0.9<br>(5.2%)  | 0.8<br>(5.7%)  | 0.7<br>(6.3%)  | 0.6<br>(6.7%)  | 0.4<br>(7.4%)  |
| Kuwait       | 1.9<br>(3.6%) | 2.0<br>(2.5%) | 2.0<br>(2.5%) | 2.0<br>(2.6%) | 2.0<br>(2.7%) | 2.0<br>(2.9%) | 2.0<br>(3.1%) | 2.0<br>(3.4%) | 2.0<br>(3.7%) | 1.9<br>(4.0%) | 1.9<br>(4.4%) | 1.9<br>(4.9%) | 1.8<br>(5.5%) | 1.8<br>(6.1%)  | 1.7<br>(6.8%)  | 1.6<br>(7.6%)  | 1.4<br>(8.6%)  | 1.3<br>(9.7%)  | 1.1<br>(10.9%) | 0.9<br>(12.4%) |
| Lebanon      | 1.2<br>(2.4%) | 1.2<br>(1.7%) | 1.2<br>(1.7%) | 1.2<br>(1.7%) | 1.2<br>(1.8%) | 1.2<br>(2.0%) | 1.2<br>(2.1%) | 1.2<br>(2.3%) | 1.2<br>(2.5%) | 1.2<br>(2.8%) | 1.2<br>(3.1%) | 1.2<br>(3.4%) | 1.1<br>(3.8%) | 1.1<br>(4.3%)  | 1.0<br>(4.7%)  | 0.9<br>(5.2%)  | 0.8<br>(5.7%)  | 0.6<br>(6.1%)  | 0.5<br>(6.6%)  | 0.4<br>(7.1%)  |
| Libya        | 1.5<br>(3.1%) | 1.6<br>(2.2%) | 1.6<br>(2.2%) | 1.6<br>(2.2%) | 1.6<br>(2.3%) | 1.6<br>(2.5%) | 1.6<br>(2.7%) | 1.6<br>(3.0%) | 1.6<br>(3.3%) | 1.6<br>(3.6%) | 1.5<br>(4.0%) | 1.5<br>(4.4%) | 1.5<br>(4.9%) | 1.4<br>(5.4%)  | 1.3<br>(6.0%)  | 1.2<br>(6.5%)  | 1.0<br>(7.0%)  | 0.9<br>(7.5%)  | 0.7<br>(7.6%)  | 0.5<br>(8.5%)  |
| Morocco      | 1.5<br>(3.2%) | 1.6<br>(2.2%) | 1.6<br>(2.2%) | 1.6<br>(2.3%) | 1.6<br>(2.4%) | 1.6<br>(2.6%) | 1.6<br>(2.9%) | 1.6<br>(3.1%) | 1.6<br>(3.5%) | 1.6<br>(3.8%) | 1.6<br>(4.3%) | 1.5<br>(4.9%) | 1.5<br>(5.5%) | 1.4<br>(6.1%)  | 1.3<br>(6.8%)  | 1.1<br>(7.4%)  | 1.0<br>(8.0%)  | 0.8<br>(8.5%)  | 0.6<br>(8.7%)  | 0.4<br>(9.1%)  |
| Oman         | 1.5<br>(3.1%) | 1.5<br>(2.2%) | 1.5<br>(2.2%) | 1.5<br>(2.2%) | 1.5<br>(2.4%) | 1.5<br>(2.6%) | 1.6<br>(2.8%) | 1.6<br>(3.1%) | 1.6<br>(3.4%) | 1.6<br>(3.8%) | 1.5<br>(4.3%) | 1.5<br>(4.9%) | 1.5<br>(5.6%) | 1.4<br>(6.5%)  | 1.4<br>(7.6%)  | 1.2<br>(8.9%)  | 1.1<br>(10.0%) | 0.9<br>(11.1%) | 0.7<br>(12.0%) | 0.4<br>(11.1%) |
| Palestine    | 1.3<br>(2.5%) | 1.4<br>(1.9%) | 1.4<br>(1.9%) | 1.4<br>(2.0%) | 1.4<br>(2.1%) | 1.4<br>(2.2%) | 1.4<br>(2.4%) | 1.4<br>(2.7%) | 1.4<br>(2.9%) | 1.4<br>(3.3%) | 1.3<br>(3.7%) | 1.3<br>(4.2%) | 1.3<br>(4.7%) | 1.2<br>(5.4%)  | 1.1<br>(6.1%)  | 1.0<br>(6.8%)  | 0.9<br>(7.6%)  | 0.7<br>(8.2%)  | 0.6<br>(8.4%)  | 0.4<br>(8.9%)  |
| Qatar        | 1.3<br>(2.7%) | 1.3<br>(1.8%) | 1.3<br>(1.8%) | 1.3<br>(1.8%) | 1.3<br>(1.9%) | 1.3<br>(2.1%) | 1.3<br>(2.3%) | 1.3<br>(2.5%) | 1.3<br>(2.8%) | 1.3<br>(3.1%) | 1.3<br>(3.4%) | 1.3<br>(3.9%) | 1.3<br>(4.5%) | 1.2<br>(5.2%)  | 1.2<br>(6.1%)  | 1.1<br>(7.3%)  | 1.0<br>(8.9%)  | 0.8<br>(10.8%) | 0.7<br>(13.3%) | 0.5<br>(14.4%) |
| Saudi Arabia | 2.0<br>(4.1%) | 2.0<br>(2.9%) | 2.0<br>(2.9%) | 2.0<br>(2.9%) | 2.0<br>(3.1%) | 2.0<br>(3.3%) | 2.0<br>(3.6%) | 2.0<br>(4.0%) | 2.0<br>(4.4%) | 2.0<br>(4.9%) | 2.0<br>(5.4%) | 1.9<br>(6.0%) | 1.9<br>(6.7%) | 1.8<br>(7.3%)  | 1.6<br>(8.0%)  | 1.4<br>(8.6%)  | 1.2<br>(9.2%)  | 1.0<br>(9.9%)  | 0.8<br>(10.6%) | 0.6<br>(11.7%) |
| Sudan        | 2.2<br>(4.2%) | 2.2<br>(3.3%) | 2.2<br>(3.3%) | 2.2<br>(3.3%) | 2.2<br>(3.5%) | 2.2<br>(3.8%) | 2.2<br>(4.1%) | 2.3<br>(4.6%) | 2.2<br>(5.0%) | 2.2<br>(5.6%) | 2.2<br>(6.2%) | 2.1<br>(6.9%) | 2.1<br>(7.8%) | 1.9<br>(8.6%)  | 1.8<br>(9.6%)  | 1.6<br>(10.6%) | 1.4<br>(11.6%) | 1.2<br>(12.5%) | 0.9<br>(13.2%) | 0.7<br>(13.8%) |
| Syria        | 1.4<br>(2.9%) | 1.5<br>(2.1%) | 1.5<br>(2.1%) | 1.5<br>(2.1%) | 1.5<br>(2.2%) | 1.5<br>(2.4%) | 1.5<br>(2.6%) | 1.5<br>(2.9%) | 1.4<br>(3.2%) | 1.4<br>(3.5%) | 1.4<br>(3.8%) | 1.4<br>(4.3%) | 1.3<br>(4.8%) | 1.2<br>(5.3%)  | 1.1<br>(5.7%)  | 0.9<br>(6.1%)  | 0.8<br>(6.5%)  | 0.6<br>(6.9%)  | 0.5<br>(7.5%)  | 0.3<br>(8.4%)  |
| Tunisia      | 1.2<br>(2.6%) | 1.3<br>(1.8%) | 1.3<br>(1.8%) | 1.3<br>(1.8%) | 1.3<br>(1.9%) | 1.3<br>(2.1%) | 1.3<br>(2.2%) | 1.3<br>(2.4%) | 1.3<br>(2.7%) | 1.3<br>(2.9%) | 1.3<br>(3.2%) | 1.3<br>(3.6%) | 1.2<br>(4.0%) | 1.2<br>(4.5%)  | 1.1<br>(5.1%)  | 1.0<br>(5.7%)  | 0.9<br>(6.3%)  | 0.8<br>(6.9%)  | 0.6<br>(7.5%)  | 0.4<br>(7.9%)  |
| Turkey       | 1.1<br>(2.3%) | 1.2<br>(1.6%) | 1.2<br>(1.6%) | 1.2<br>(1.6%) | 1.2<br>(1.7%) | 1.2<br>(1.8%) | 1.2<br>(1.9%) | 1.2<br>(2.1%) | 1.2<br>(2.3%) | 1.2<br>(2.6%) | 1.2<br>(2.8%) | 1.1<br>(3.2%) | 1.1<br>(3.6%) | 1.1<br>(4.0%)  | 1.0<br>(4.5%)  | 0.9<br>(5.0%)  | 0.8<br>(5.6%)  | 0.7<br>(6.2%)  | 0.6<br>(6.8%)  | 0.5<br>(7.3%)  |
| UAE          | 1.5<br>(3.5%) | 1.5<br>(2.2%) | 1.5<br>(2.2%) | 1.5<br>(2.2%) | 1.5<br>(2.4%) | 1.5<br>(2.6%) | 1.5<br>(2.8%) | 1.5<br>(3.1%) | 1.5<br>(3.4%) | 1.5<br>(3.8%) | 1.5<br>(4.2%) | 1.5<br>(4.8%) | 1.4<br>(5.3%) | 1.4<br>(6.0%)  | 1.2<br>(6.7%)  | 1.1<br>(7.4%)  | 1.0<br>(8.0%)  | 0.8<br>(9.1%)  | 0.7<br>(10.1%) | 0.5<br>(11.0%) |
| Yemen        | 2.0<br>(3.9%) | 2.0<br>(3.1%) | 2.0<br>(3.1%) | 2.0<br>(3.1%) | 2.0<br>(3.3%) | 2.0<br>(3.6%) | 2.1<br>(4.0%) | 2.1<br>(4.4%) | 2.1<br>(4.8%) | 2.1<br>(5.4%) | 2.1<br>(6.0%) | 2.0<br>(6.8%) | 1.9<br>(7.5%) | 1.8<br>(8.3%)  | 1.6<br>(9.2%)  | 1.4<br>(10.0%) | 1.2<br>(10.8%) | 1.0<br>(11.5%) | 0.8<br>(12.2%) | 0.6<br>(12.6%) |

**Supplementary Figure 3. Changes in life expectancy by age in North Africa and Middle East in 2019 if PM pollution had been lowered to the theoretical minimum risk exposure levels**

|              | All Ages      | Under 1       | 1 to 4        | 5 to 9        | 10 to 14      | 15 to 19      | 20 to 24      | 25 to 29      | 30 to 34      | 35 to 39      | 40 to 44      | 45 to 49      | 50 to 54      | 55 to 59       | 60 to 64       | 65 to 69       | 70 to 74       | 75 to 79       | 80 to 84       | 85 plus        |
|--------------|---------------|---------------|---------------|---------------|---------------|---------------|---------------|---------------|---------------|---------------|---------------|---------------|---------------|----------------|----------------|----------------|----------------|----------------|----------------|----------------|
| NAME         | 1.6<br>(3.2%) | 1.7<br>(2.3%) | 1.7<br>(2.3%) | 1.7<br>(2.4%) | 1.7<br>(2.5%) | 1.7<br>(2.7%) | 1.7<br>(3.0%) | 1.7<br>(3.2%) | 1.7<br>(3.6%) | 1.6<br>(3.9%) | 1.6<br>(4.4%) | 1.6<br>(4.9%) | 1.5<br>(5.4%) | 1.4<br>(6.0%)  | 1.3<br>(6.5%)  | 1.2<br>(7.1%)  | 1.0<br>(7.6%)  | 0.8<br>(8.2%)  | 0.7<br>(8.5%)  | 0.5<br>(9.1%)  |
| Afghanistan  | 2.3<br>(4.7%) | 2.3<br>(3.7%) | 2.3<br>(3.7%) | 2.3<br>(3.8%) | 2.3<br>(4.0%) | 2.3<br>(4.4%) | 2.3<br>(4.8%) | 2.3<br>(5.4%) | 2.3<br>(6.0%) | 2.3<br>(6.7%) | 2.3<br>(7.6%) | 2.2<br>(8.5%) | 2.1<br>(9.4%) | 1.9<br>(10.3%) | 1.7<br>(11.1%) | 1.5<br>(11.9%) | 1.2<br>(12.7%) | 1.0<br>(13.4%) | 0.8<br>(14.0%) | 0.6<br>(14.8%) |
| Algeria      | 1.1<br>(2.2%) | 1.1<br>(1.6%) | 1.1<br>(1.6%) | 1.1<br>(1.6%) | 1.1<br>(1.7%) | 1.1<br>(1.8%) | 1.1<br>(2.0%) | 1.1<br>(2.1%) | 1.1<br>(2.4%) | 1.1<br>(2.6%) | 1.1<br>(2.8%) | 1.1<br>(3.2%) | 1.0<br>(3.5%) | 1.0<br>(3.9%)  | 0.9<br>(4.3%)  | 0.8<br>(4.7%)  | 0.7<br>(5.1%)  | 0.6<br>(5.7%)  | 0.4<br>(6.5%)  | 0.3<br>(8.7%)  |
| Bahrain      | 1.4<br>(3.2%) | 1.5<br>(2.0%) | 1.5<br>(2.0%) | 1.5<br>(2.0%) | 1.5<br>(2.2%) | 1.5<br>(2.3%) | 1.5<br>(2.5%) | 1.5<br>(2.8%) | 1.5<br>(3.0%) | 1.5<br>(3.4%) | 1.5<br>(3.8%) | 1.4<br>(4.3%) | 1.4<br>(4.8%) | 1.4<br>(5.6%)  | 1.3<br>(6.5%)  | 1.2<br>(7.5%)  | 1.1<br>(8.8%)  | 0.9<br>(9.9%)  | 0.7<br>(10.7%) | 0.5<br>(12.1%) |
| Egypt        | 2.0<br>(4.2%) | 2.1<br>(3.1%) | 2.1<br>(3.1%) | 2.1<br>(3.1%) | 2.1<br>(3.3%) | 2.1<br>(3.6%) | 2.1<br>(3.9%) | 2.1<br>(4.3%) | 2.0<br>(4.8%) | 2.0<br>(5.3%) | 2.0<br>(5.9%) | 1.9<br>(6.7%) | 1.9<br>(7.6%) | 1.7<br>(8.5%)  | 1.6<br>(9.4%)  | 1.3<br>(9.9%)  | 1.1<br>(10.5%) | 0.9<br>(10.9%) | 0.7<br>(11.1%) | 0.5<br>(11.0%) |
| Iran         | 1.3<br>(2.5%) | 1.3<br>(1.8%) | 1.3<br>(1.8%) | 1.3<br>(1.8%) | 1.3<br>(1.9%) | 1.3<br>(2.0%) | 1.3<br>(2.2%) | 1.3<br>(2.4%) | 1.3<br>(2.6%) | 1.3<br>(2.9%) | 1.3<br>(3.2%) | 1.3<br>(3.6%) | 1.2<br>(4.0%) | 1.2<br>(4.4%)  | 1.1<br>(5.0%)  | 1.0<br>(5.6%)  | 0.9<br>(6.2%)  | 0.8<br>(7.1%)  | 0.7<br>(7.7%)  | 0.5<br>(8.6%)  |
| Iraq         | 2.0<br>(3.9%) | 2.0<br>(2.9%) | 2.0<br>(2.9%) | 2.0<br>(2.9%) | 2.0<br>(3.1%) | 2.0<br>(3.4%) | 2.0<br>(3.7%) | 2.0<br>(4.0%) | 2.0<br>(4.5%) | 2.0<br>(5.0%) | 2.0<br>(5.6%) | 2.0<br>(6.3%) | 1.9<br>(7.0%) | 1.8<br>(7.8%)  | 1.7<br>(8.6%)  | 1.5<br>(9.4%)  | 1.3<br>(10.0%) | 1.0<br>(10.5%) | 0.8<br>(10.8%) | 0.6<br>(11.2%) |
| Jordan       | 1.1<br>(2.1%) | 1.2<br>(1.6%) | 1.2<br>(1.6%) | 1.2<br>(1.6%) | 1.2<br>(1.7%) | 1.2<br>(1.8%) | 1.2<br>(2.0%) | 1.2<br>(2.1%) | 1.2<br>(2.3%) | 1.2<br>(2.6%) | 1.2<br>(2.9%) | 1.1<br>(3.2%) | 1.1<br>(3.6%) | 1.1<br>(4.0%)  | 1.0<br>(4.5%)  | 0.9<br>(5.0%)  | 0.8<br>(5.5%)  | 0.7<br>(6.1%)  | 0.6<br>(6.5%)  | 0.4<br>(7.2%)  |
| Kuwait       | 1.9<br>(3.5%) | 1.9<br>(2.5%) | 1.9<br>(2.5%) | 1.9<br>(2.5%) | 1.9<br>(2.6%) | 1.9<br>(2.8%) | 1.9<br>(3.1%) | 1.9<br>(3.3%) | 1.9<br>(3.6%) | 1.9<br>(4.0%) | 1.9<br>(4.4%) | 1.9<br>(4.8%) | 1.8<br>(5.3%) | 1.7<br>(5.9%)  | 1.6<br>(6.6%)  | 1.5<br>(7.4%)  | 1.4<br>(8.3%)  | 1.3<br>(9.4%)  | 1.1<br>(10.6%) | 0.9<br>(12.1%) |
| Lebanon      | 1.1<br>(2.3%) | 1.2<br>(1.7%) | 1.2<br>(1.7%) | 1.2<br>(1.7%) | 1.2<br>(1.8%) | 1.2<br>(1.9%) | 1.2<br>(2.1%) | 1.2<br>(2.3%) | 1.2<br>(2.5%) | 1.2<br>(2.8%) | 1.2<br>(3.0%) | 1.1<br>(3.4%) | 1.1<br>(3.8%) | 1.0<br>(4.2%)  | 1.0<br>(4.6%)  | 0.9<br>(5.1%)  | 0.8<br>(5.5%)  | 0.6<br>(5.9%)  | 0.5<br>(6.3%)  | 0.4<br>(6.8%)  |
| Libya        | 1.5<br>(3.0%) | 1.5<br>(2.1%) | 1.5<br>(2.1%) | 1.5<br>(2.1%) | 1.5<br>(2.3%) | 1.5<br>(2.5%) | 1.5<br>(2.7%) | 1.5<br>(2.9%) | 1.5<br>(3.2%) | 1.5<br>(3.5%) | 1.5<br>(3.9%) | 1.5<br>(4.3%) | 1.4<br>(4.7%) | 1.3<br>(5.2%)  | 1.3<br>(5.8%)  | 1.1<br>(6.3%)  | 1.0<br>(6.7%)  | 0.9<br>(7.2%)  | 0.7<br>(7.3%)  | 0.5<br>(8.0%)  |
| Morocco      | 1.5<br>(3.1%) | 1.5<br>(2.2%) | 1.5<br>(2.2%) | 1.5<br>(2.2%) | 1.5<br>(2.4%) | 1.5<br>(2.6%) | 1.5<br>(2.8%) | 1.5<br>(3.1%) | 1.5<br>(3.4%) | 1.5<br>(3.8%) | 1.5<br>(4.2%) | 1.5<br>(4.8%) | 1.4<br>(5.3%) | 1.4<br>(6.0%)  | 1.2<br>(6.6%)  | 1.1<br>(7.2%)  | 0.9<br>(7.8%)  | 0.8<br>(8.2%)  | 0.6<br>(8.5%)  | 0.4<br>(8.8%)  |
| Oman         | 1.5<br>(3.1%) | 1.5<br>(2.2%) | 1.5<br>(2.2%) | 1.5<br>(2.2%) | 1.5<br>(2.3%) | 1.5<br>(2.5%) | 1.5<br>(2.8%) | 1.5<br>(3.0%) | 1.5<br>(3.4%) | 1.5<br>(3.7%) | 1.5<br>(4.2%) | 1.5<br>(4.8%) | 1.5<br>(5.5%) | 1.4<br>(6.4%)  | 1.3<br>(7.5%)  | 1.2<br>(8.7%)  | 1.0<br>(9.8%)  | 0.9<br>(10.9%) | 0.7<br>(11.7%) | 0.4<br>(10.8%) |
| Palestine    | 1.3<br>(2.5%) | 1.3<br>(1.9%) | 1.3<br>(1.9%) | 1.3<br>(1.9%) | 1.3<br>(2.0%) | 1.3<br>(2.2%) | 1.3<br>(2.4%) | 1.3<br>(2.6%) | 1.3<br>(2.9%) | 1.3<br>(3.2%) | 1.3<br>(3.6%) | 1.3<br>(4.1%) | 1.3<br>(4.7%) | 1.2<br>(5.3%)  | 1.1<br>(6.0%)  | 1.0<br>(6.7%)  | 0.9<br>(7.4%)  | 0.7<br>(8.0%)  | 0.6<br>(8.1%)  | 0.4<br>(8.7%)  |
| Qatar        | 1.3<br>(2.7%) | 1.3<br>(1.8%) | 1.3<br>(1.8%) | 1.3<br>(1.8%) | 1.3<br>(1.9%) | 1.3<br>(2.1%) | 1.3<br>(2.3%) | 1.3<br>(2.5%) | 1.3<br>(2.7%) | 1.3<br>(3.0%) | 1.3<br>(3.4%) | 1.3<br>(3.9%) | 1.2<br>(4.4%) | 1.2<br>(5.1%)  | 1.1<br>(6.0%)  | 1.1<br>(7.2%)  | 1.0<br>(8.7%)  | 0.8<br>(10.6%) | 0.6<br>(13.1%) | 0.5<br>(14.0%) |
| Saudi Arabia | 1.9<br>(4.1%) | 2.0<br>(2.8%) | 2.0<br>(2.8%) | 2.0<br>(2.9%) | 2.0<br>(3.0%) | 2.0<br>(3.3%) | 2.0<br>(3.6%) | 2.0<br>(3.9%) | 2.0<br>(4.3%) | 2.0<br>(4.8%) | 2.0<br>(5.3%) | 1.9<br>(6.0%) | 1.8<br>(6.6%) | 1.7<br>(7.2%)  | 1.6<br>(7.9%)  | 1.4<br>(8.4%)  | 1.2<br>(9.0%)  | 1.0<br>(9.6%)  | 0.8<br>(10.3%) | 0.6<br>(11.3%) |
| Sudan        | 2.2<br>(4.1%) | 2.2<br>(3.2%) | 2.2<br>(3.2%) | 2.2<br>(3.3%) | 2.2<br>(3.5%) | 2.2<br>(3.8%) | 2.2<br>(4.1%) | 2.2<br>(4.5%) | 2.2<br>(5.0%) | 2.2<br>(5.5%) | 2.2<br>(6.1%) | 2.1<br>(6.9%) | 2.0<br>(7.7%) | 1.9<br>(8.6%)  | 1.8<br>(9.5%)  | 1.6<br>(10.5%) | 1.4<br>(11.4%) | 1.2<br>(12.4%) | 0.9<br>(13.0%) | 0.7<br>(13.7%) |
| Syria        | 1.3<br>(2.8%) | 1.4<br>(2.0%) | 1.4<br>(2.0%) | 1.4<br>(2.1%) | 1.4<br>(2.2%) | 1.4<br>(2.4%) | 1.4<br>(2.6%) | 1.4<br>(2.8%) | 1.4<br>(3.1%) | 1.4<br>(3.4%) | 1.4<br>(3.8%) | 1.3<br>(4.2%) | 1.3<br>(4.7%) | 1.2<br>(5.1%)  | 1.0<br>(5.6%)  | 0.9<br>(6.0%)  | 0.7<br>(6.3%)  | 0.6<br>(6.8%)  | 0.5<br>(7.3%)  | 0.3<br>(8.1%)  |
| Tunisia      | 1.2<br>(2.5%) | 1.3<br>(1.7%) | 1.3<br>(1.7%) | 1.3<br>(1.7%) | 1.3<br>(1.8%) | 1.3<br>(2.0%) | 1.3<br>(2.2%) | 1.3<br>(2.4%) | 1.3<br>(2.6%) | 1.3<br>(2.8%) | 1.3<br>(3.1%) | 1.2<br>(3.5%) | 1.2<br>(3.9%) | 1.1<br>(4.4%)  | 1.1<br>(4.9%)  | 1.0<br>(5.5%)  | 0.9<br>(6.1%)  | 0.7<br>(6.6%)  | 0.6<br>(7.2%)  | 0.4<br>(7.7%)  |
| Turkey       | 1.1<br>(2.2%) | 1.1<br>(1.5%) | 1.1<br>(1.5%) | 1.1<br>(1.5%) | 1.1<br>(1.6%) | 1.1<br>(1.7%) | 1.1<br>(1.9%) | 1.1<br>(2.0%) | 1.1<br>(2.2%) | 1.1<br>(2.4%) | 1.1<br>(2.7%) | 1.1<br>(3.0%) | 1.1<br>(3.4%) | 1.0<br>(3.8%)  | 1.0<br>(4.2%)  | 0.9<br>(4.7%)  | 0.8<br>(5.3%)  | 0.7<br>(5.8%)  | 0.6<br>(6.3%)  | 0.4<br>(6.8%)  |
| UAE          | 1.5<br>(3.4%) | 1.5<br>(2.1%) | 1.5<br>(2.1%) | 1.5<br>(2.2%) | 1.5<br>(2.3%) | 1.5<br>(2.5%) | 1.5<br>(2.7%) | 1.5<br>(3.0%) | 1.5<br>(3.3%) | 1.5<br>(3.7%) | 1.5<br>(4.1%) | 1.4<br>(4.6%) | 1.4<br>(5.2%) | 1.3<br>(5.8%)  | 1.2<br>(6.5%)  | 1.1<br>(7.1%)  | 0.9<br>(7.7%)  | 0.8<br>(8.8%)  | 0.7<br>(9.7%)  | 0.5<br>(10.6%) |
| Yemen        | 2.0<br>(3.9%) | 2.0<br>(3.0%) | 2.0<br>(3.0%) | 2.0<br>(3.1%) | 2.0<br>(3.3%) | 2.0<br>(3.6%) | 2.0<br>(3.9%) | 2.0<br>(4.3%) | 2.0<br>(4.8%) | 2.0<br>(5.3%) | 2.0<br>(5.9%) | 2.0<br>(6.6%) | 1.9<br>(7.4%) | 1.8<br>(8.1%)  | 1.6<br>(9.0%)  | 1.4<br>(9.8%)  | 1.2<br>(10.7%) | 1.0<br>(11.3%) | 0.8<br>(11.9%) | 0.6<br>(12.3%) |

Supplementary Figure 4. Changes in life expectancy by age in North Africa and Middle East in 2019 if household air pollution from solid fuels had been lowered to the theoretical minimum risk exposure levels

|              | All Ages      | Under 1       | 1 to 4        | 5 to 9        | 10 to 14      | 15 to 19      | 20 to 24      | 25 to 29      | 30 to 34      | 35 to 39      | 40 to 44      | 45 to 49      | 50 to 54      | 55 to 59      | 60 to 64      | 65 to 69      | 70 to 74      | 75 to 79      | 80 to 84       | 85 plus        |
|--------------|---------------|---------------|---------------|---------------|---------------|---------------|---------------|---------------|---------------|---------------|---------------|---------------|---------------|---------------|---------------|---------------|---------------|---------------|----------------|----------------|
| NAME         | 0.2<br>(0.3%) | 0.2<br>(0.2%) | 0.2<br>(0.2%) | 0.2<br>(0.2%) | 0.2<br>(0.3%) | 0.2<br>(0.3%) | 0.2<br>(0.3%) | 0.2<br>(0.3%) | 0.2<br>(0.4%) | 0.2<br>(0.4%) | 0.2<br>(0.4%) | 0.2<br>(0.5%) | 0.1<br>(0.5%) | 0.1<br>(0.5%) | 0.1<br>(0.6%) | 0.1<br>(0.6%) | 0.1<br>(0.7%) | 0.1<br>(0.7%) | 0.1<br>(0.7%)  | 0.1<br>(0.6%)  |
| Afghanistan  | 1.7<br>(3.4%) | 1.7<br>(2.8%) | 1.7<br>(2.8%) | 1.7<br>(2.8%) | 1.7<br>(3.0%) | 1.7<br>(3.2%) | 1.7<br>(3.6%) | 1.7<br>(4.0%) | 1.7<br>(4.4%) | 1.7<br>(5.0%) | 1.7<br>(5.6%) | 1.6<br>(6.3%) | 1.5<br>(6.9%) | 1.4<br>(7.6%) | 1.2<br>(8.2%) | 1.1<br>(8.7%) | 0.9<br>(9.3%) | 0.7<br>(9.9%) | 0.6<br>(10.2%) | 0.4<br>(10.8%) |
| Algeria      | (0.0%)        | (0.0%)        | (0.0%)        | (0.0%)        | (0.0%)        | (0.0%)        | (0.0%)        | (0.0%)        | (0.0%)        | (0.0%)        | (0.0%)        | (0.0%)        | (0.0%)        | (0.0%)        | (0.0%)        | (0.0%)        | (0.0%)        | (0.0%)        | (0.0%)         | (0.0%)         |
| Bahrain      | (0.0%)        | (0.0%)        | (0.0%)        | (0.0%)        | (0.0%)        | (0.0%)        | (0.0%)        | (0.0%)        | (0.0%)        | (0.0%)        | (0.0%)        | (0.0%)        | (0.0%)        | (0.0%)        | (0.0%)        | (0.0%)        | (0.1%)        | (0.1%)        | (0.1%)         | (0.1%)         |
| Egypt        | (0.0%)        | (0.0%)        | (0.0%)        | (0.0%)        | (0.0%)        | (0.0%)        | (0.0%)        | (0.0%)        | (0.0%)        | (0.0%)        | (0.0%)        | (0.0%)        | (0.0%)        | (0.0%)        | (0.1%)        | (0.0%)        | (0.1%)        | (0.0%)        | (0.0%)         | (0.0%)         |
| Iran         | (0.0%)        | (0.0%)        | (0.0%)        | (0.0%)        | (0.0%)        | (0.0%)        | (0.0%)        | (0.0%)        | (0.0%)        | (0.0%)        | (0.0%)        | (0.0%)        | (0.0%)        | (0.0%)        | (0.0%)        | (0.0%)        | (0.0%)        | (0.0%)        | (0.0%)         | (0.0%)         |
| Iraq         | (0.0%)        | (0.0%)        | (0.0%)        | (0.0%)        | (0.0%)        | (0.0%)        | (0.0%)        | (0.0%)        | (0.0%)        | (0.0%)        | (0.0%)        | (0.0%)        | (0.0%)        | (0.0%)        | (0.0%)        | (0.1%)        | (0.0%)        | (0.1%)        | (0.0%)         | (0.0%)         |
| Jordan       | (0.0%)        | (0.0%)        | (0.0%)        | (0.0%)        | (0.0%)        | (0.0%)        | (0.0%)        | (0.0%)        | (0.0%)        | (0.0%)        | (0.0%)        | (0.0%)        | (0.0%)        | (0.0%)        | (0.0%)        | (0.0%)        | (0.0%)        | (0.0%)        | (0.0%)         | (0.0%)         |
| Kuwait       | (0.0%)        | (0.0%)        | (0.0%)        | (0.0%)        | (0.0%)        | (0.0%)        | (0.0%)        | (0.0%)        | (0.0%)        | (0.0%)        | (0.0%)        | (0.0%)        | (0.0%)        | (0.0%)        | (0.0%)        | (0.0%)        | (0.0%)        | (0.1%)        | (0.0%)         | (0.1%)         |
| Lebanon      | (0.0%)        | (0.0%)        | (0.0%)        | (0.0%)        | (0.0%)        | (0.0%)        | (0.0%)        | (0.0%)        | (0.0%)        | (0.0%)        | (0.0%)        | (0.0%)        | (0.0%)        | (0.0%)        | (0.0%)        | (0.0%)        | (0.0%)        | (0.0%)        | (0.0%)         | (0.0%)         |
| Libya        | (0.0%)        | (0.0%)        | (0.0%)        | (0.0%)        | (0.0%)        | (0.0%)        | (0.0%)        | (0.0%)        | (0.0%)        | (0.0%)        | (0.0%)        | (0.0%)        | (0.0%)        | (0.0%)        | (0.0%)        | (0.0%)        | (0.0%)        | (0.0%)        | (0.0%)         | (0.0%)         |
| Morocco      | 0.1<br>(0.2%) | 0.1<br>(0.1%) | 0.1<br>(0.1%) | 0.1<br>(0.1%) | 0.1<br>(0.1%) | 0.1<br>(0.2%) | 0.1<br>(0.2%) | 0.1<br>(0.2%) | 0.1<br>(0.2%) | 0.1<br>(0.2%) | 0.1<br>(0.3%) | 0.1<br>(0.3%) | 0.1<br>(0.3%) | 0.1<br>(0.4%) | 0.1<br>(0.4%) | 0.1<br>(0.4%) | 0.1<br>(0.5%) | 0.1<br>(0.5%) | 0.1<br>(0.5%)  | 0.1<br>(0.5%)  |
| Oman         | (0.0%)        | (0.0%)        | (0.0%)        | (0.0%)        | (0.0%)        | (0.0%)        | (0.0%)        | (0.0%)        | (0.0%)        | (0.0%)        | (0.0%)        | (0.0%)        | (0.0%)        | (0.0%)        | (0.0%)        | (0.0%)        | (0.0%)        | (0.0%)        | (0.0%)         | (0.0%)         |
| Palestine    | (0.0%)        | (0.0%)        | (0.0%)        | (0.0%)        | (0.0%)        | (0.0%)        | (0.0%)        | (0.0%)        | (0.0%)        | (0.0%)        | (0.0%)        | (0.0%)        | (0.1%)        | (0.1%)        | (0.1%)        | (0.1%)        | (0.1%)        | (0.1%)        | (0.1%)         | (0.1%)         |
| Qatar        | (0.0%)        | (0.0%)        | (0.0%)        | (0.0%)        | (0.0%)        | (0.0%)        | (0.0%)        | (0.0%)        | (0.0%)        | (0.0%)        | (0.0%)        | (0.0%)        | (0.0%)        | (0.0%)        | (0.0%)        | (0.0%)        | (0.0%)        | (0.0%)        | (0.0%)         | (0.1%)         |
| Saudi Arabia | (0.0%)        | (0.0%)        | (0.0%)        | (0.0%)        | (0.0%)        | (0.0%)        | (0.0%)        | (0.0%)        | (0.0%)        | (0.0%)        | (0.0%)        | (0.0%)        | (0.0%)        | (0.0%)        | (0.0%)        | (0.0%)        | (0.0%)        | (0.0%)        | (0.1%)         | (0.1%)         |
| Sudan        | 0.8<br>(1.5%) | 0.8<br>(1.2%) | 0.8<br>(1.2%) | 0.8<br>(1.2%) | 0.8<br>(1.3%) | 0.8<br>(1.4%) | 0.8<br>(1.5%) | 0.8<br>(1.7%) | 0.8<br>(1.9%) | 0.8<br>(2.1%) | 0.8<br>(2.3%) | 0.8<br>(2.6%) | 0.8<br>(2.9%) | 0.7<br>(3.2%) | 0.7<br>(3.5%) | 0.6<br>(3.9%) | 0.5<br>(4.2%) | 0.4<br>(4.6%) | 0.3<br>(4.8%)  | 0.2<br>(5.0%)  |
| Syria        | (0.0%)        | (0.0%)        | (0.0%)        | (0.0%)        | (0.0%)        | (0.0%)        | (0.0%)        | (0.0%)        | (0.0%)        | (0.0%)        | (0.0%)        | (0.0%)        | (0.0%)        | (0.0%)        | (0.0%)        | (0.0%)        | (0.1%)        | (0.0%)        | (0.0%)         | (0.0%)         |
| Tunisia      | (0.0%)        | (0.0%)        | (0.0%)        | (0.0%)        | (0.0%)        | (0.0%)        | (0.0%)        | (0.0%)        | (0.0%)        | (0.0%)        | (0.0%)        | (0.0%)        | (0.0%)        | (0.0%)        | (0.0%)        | (0.0%)        | (0.1%)        | (0.0%)        | (0.0%)         | (0.0%)         |
| Turkey       | (0.0%)        | (0.0%)        | (0.0%)        | (0.0%)        | (0.0%)        | (0.0%)        | (0.0%)        | (0.0%)        | (0.0%)        | (0.0%)        | (0.0%)        | (0.0%)        | (0.0%)        | (0.0%)        | (0.0%)        | (0.0%)        | (0.0%)        | (0.1%)        | (0.1%)         | (0.0%)         |
| UAE          | (0.0%)        | (0.0%)        | (0.0%)        | (0.0%)        | (0.0%)        | (0.0%)        | (0.0%)        | (0.0%)        | (0.0%)        | (0.0%)        | (0.0%)        | (0.0%)        | (0.0%)        | (0.0%)        | (0.0%)        | (0.0%)        | (0.0%)        | (0.0%)        | (0.0%)         | (0.0%)         |
| Yemen        | 0.8<br>(1.7%) | 0.9<br>(1.3%) | 0.9<br>(1.3%) | 0.9<br>(1.3%) | 0.9<br>(1.4%) | 0.9<br>(1.5%) | 0.9<br>(1.7%) | 0.9<br>(1.8%) | 0.9<br>(2.0%) | 0.9<br>(2.3%) | 0.9<br>(2.6%) | 0.8<br>(2.8%) | 0.8<br>(3.2%) | 0.7<br>(3.5%) | 0.7<br>(3.9%) | 0.6<br>(4.2%) | 0.5<br>(4.6%) | 0.4<br>(4.8%) | 0.3<br>(5.1%)  | 0.3<br>(5.2%)  |



**Supplementary Figure 5. Changes in life expectancy by age in North Africa and Middle East in 2019 if ambient PM pollution had been lowered to the theoretical minimum risk exposure levels**

|              | All Ages      | Under 1       | 1 to 4        | 5 to 9        | 10 to 14      | 15 to 19      | 20 to 24      | 25 to 29      | 30 to 34      | 35 to 39      | 40 to 44      | 45 to 49      | 50 to 54      | 55 to 59      | 60 to 64      | 65 to 69      | 70 to 74       | 75 to 79       | 80 to 84       | 85 plus        |
|--------------|---------------|---------------|---------------|---------------|---------------|---------------|---------------|---------------|---------------|---------------|---------------|---------------|---------------|---------------|---------------|---------------|----------------|----------------|----------------|----------------|
| NAME         | 1.4<br>(2.8%) | 1.5<br>(2.1%) | 1.5<br>(2.1%) | 1.5<br>(2.1%) | 1.5<br>(2.2%) | 1.5<br>(2.4%) | 1.5<br>(2.6%) | 1.5<br>(2.9%) | 1.5<br>(3.1%) | 1.5<br>(3.5%) | 1.4<br>(3.9%) | 1.4<br>(4.3%) | 1.4<br>(4.8%) | 1.3<br>(5.3%) | 1.2<br>(5.9%) | 1.0<br>(6.4%) | 0.9<br>(6.8%)  | 0.7<br>(7.3%)  | 0.6<br>(7.7%)  | 0.4<br>(8.3%)  |
| Afghanistan  | 0.5<br>(1.0%) | 0.5<br>(0.8%) | 0.5<br>(0.8%) | 0.5<br>(0.8%) | 0.5<br>(0.9%) | 0.5<br>(1.0%) | 0.5<br>(1.0%) | 0.5<br>(1.2%) | 0.5<br>(1.3%) | 0.5<br>(1.5%) | 0.5<br>(1.7%) | 0.5<br>(1.8%) | 0.4<br>(2.0%) | 0.4<br>(2.2%) | 0.4<br>(2.4%) | 0.3<br>(2.5%) | 0.3<br>(2.7%)  | 0.2<br>(2.9%)  | 0.2<br>(3.0%)  | 0.1<br>(3.3%)  |
| Algeria      | 1.1<br>(2.1%) | 1.1<br>(1.6%) | 1.1<br>(1.6%) | 1.1<br>(1.6%) | 1.1<br>(1.7%) | 1.1<br>(1.8%) | 1.1<br>(2.0%) | 1.1<br>(2.1%) | 1.1<br>(2.3%) | 1.1<br>(2.6%) | 1.1<br>(2.8%) | 1.1<br>(3.1%) | 1.0<br>(3.5%) | 1.0<br>(3.8%) | 0.9<br>(4.2%) | 0.8<br>(4.6%) | 0.7<br>(5.1%)  | 0.6<br>(5.7%)  | 0.4<br>(6.4%)  | 0.3<br>(8.6%)  |
| Bahrain      | 1.4<br>(3.1%) | 1.5<br>(2.0%) | 1.5<br>(2.0%) | 1.5<br>(2.0%) | 1.5<br>(2.2%) | 1.5<br>(2.3%) | 1.5<br>(2.5%) | 1.5<br>(2.8%) | 1.5<br>(3.0%) | 1.5<br>(3.4%) | 1.4<br>(3.8%) | 1.4<br>(4.2%) | 1.4<br>(4.8%) | 1.3<br>(5.5%) | 1.3<br>(6.4%) | 1.2<br>(7.5%) | 1.1<br>(8.8%)  | 0.9<br>(9.9%)  | 0.7<br>(10.7%) | 0.5<br>(12.0%) |
| Egypt        | 2.0<br>(4.1%) | 2.1<br>(3.1%) | 2.1<br>(3.1%) | 2.1<br>(3.1%) | 2.1<br>(3.3%) | 2.1<br>(3.6%) | 2.1<br>(3.9%) | 2.1<br>(4.3%) | 2.0<br>(4.8%) | 2.0<br>(5.3%) | 2.0<br>(5.9%) | 1.9<br>(6.7%) | 1.9<br>(7.6%) | 1.7<br>(8.5%) | 1.6<br>(9.3%) | 1.3<br>(9.9%) | 1.1<br>(10.4%) | 0.9<br>(10.9%) | 0.7<br>(11.1%) | 0.5<br>(11.0%) |
| Iran         | 1.2<br>(2.5%) | 1.3<br>(1.8%) | 1.3<br>(1.8%) | 1.3<br>(1.8%) | 1.3<br>(1.9%) | 1.3<br>(2.0%) | 1.3<br>(2.2%) | 1.3<br>(2.4%) | 1.3<br>(2.6%) | 1.3<br>(2.9%) | 1.3<br>(3.2%) | 1.3<br>(3.5%) | 1.2<br>(4.0%) | 1.2<br>(4.4%) | 1.1<br>(5.0%) | 1.0<br>(5.5%) | 0.9<br>(6.2%)  | 0.8<br>(7.1%)  | 0.7<br>(7.7%)  | 0.5<br>(8.6%)  |
| Iraq         | 2.0<br>(3.8%) | 2.0<br>(2.9%) | 2.0<br>(2.9%) | 2.0<br>(2.9%) | 2.0<br>(3.1%) | 2.0<br>(3.4%) | 2.0<br>(3.7%) | 2.0<br>(4.0%) | 2.0<br>(4.5%) | 2.0<br>(5.0%) | 2.0<br>(5.5%) | 2.0<br>(6.3%) | 1.9<br>(7.0%) | 1.8<br>(7.8%) | 1.7<br>(8.6%) | 1.5<br>(9.3%) | 1.3<br>(9.9%)  | 1.0<br>(10.4%) | 0.8<br>(10.8%) | 0.6<br>(11.2%) |
| Jordan       | 1.1<br>(2.1%) | 1.2<br>(1.6%) | 1.2<br>(1.6%) | 1.2<br>(1.6%) | 1.2<br>(1.7%) | 1.2<br>(1.8%) | 1.2<br>(2.0%) | 1.2<br>(2.1%) | 1.2<br>(2.3%) | 1.2<br>(2.6%) | 1.2<br>(2.9%) | 1.1<br>(3.2%) | 1.1<br>(3.6%) | 1.1<br>(4.0%) | 1.0<br>(4.5%) | 0.9<br>(5.0%) | 0.8<br>(5.5%)  | 0.7<br>(6.1%)  | 0.6<br>(6.5%)  | 0.4<br>(7.1%)  |
| Kuwait       | 1.9<br>(3.6%) | 1.9<br>(2.5%) | 1.9<br>(2.5%) | 1.9<br>(2.5%) | 1.9<br>(2.6%) | 1.9<br>(2.8%) | 1.9<br>(3.1%) | 1.9<br>(3.3%) | 1.9<br>(3.6%) | 1.9<br>(4.0%) | 1.9<br>(4.4%) | 1.9<br>(4.8%) | 1.8<br>(5.4%) | 1.7<br>(6.0%) | 1.6<br>(6.6%) | 1.5<br>(7.4%) | 1.4<br>(8.4%)  | 1.3<br>(9.4%)  | 1.1<br>(10.6%) | 0.9<br>(12.1%) |
| Lebanon      | 1.1<br>(2.3%) | 1.2<br>(1.7%) | 1.2<br>(1.7%) | 1.2<br>(1.7%) | 1.2<br>(1.8%) | 1.2<br>(1.9%) | 1.2<br>(2.1%) | 1.2<br>(2.3%) | 1.2<br>(2.5%) | 1.2<br>(2.7%) | 1.2<br>(3.0%) | 1.1<br>(3.4%) | 1.1<br>(3.8%) | 1.0<br>(4.2%) | 1.0<br>(4.6%) | 0.9<br>(5.1%) | 0.7<br>(5.5%)  | 0.6<br>(5.9%)  | 0.5<br>(6.3%)  | 0.4<br>(6.8%)  |
| Libya        | 1.5<br>(3.0%) | 1.5<br>(2.1%) | 1.5<br>(2.1%) | 1.5<br>(2.2%) | 1.5<br>(2.3%) | 1.5<br>(2.5%) | 1.5<br>(2.7%) | 1.6<br>(2.9%) | 1.5<br>(3.2%) | 1.5<br>(3.5%) | 1.5<br>(3.9%) | 1.5<br>(4.3%) | 1.4<br>(4.7%) | 1.3<br>(5.2%) | 1.3<br>(5.8%) | 1.1<br>(6.3%) | 1.0<br>(6.8%)  | 0.9<br>(7.2%)  | 0.7<br>(7.3%)  | 0.5<br>(8.1%)  |
| Morocco      | 1.4<br>(3.0%) | 1.4<br>(2.1%) | 1.4<br>(2.1%) | 1.4<br>(2.1%) | 1.4<br>(2.2%) | 1.5<br>(2.4%) | 1.5<br>(2.6%) | 1.5<br>(2.9%) | 1.5<br>(3.2%) | 1.4<br>(3.6%) | 1.4<br>(4.0%) | 1.4<br>(4.5%) | 1.4<br>(5.0%) | 1.3<br>(5.6%) | 1.2<br>(6.2%) | 1.0<br>(6.8%) | 0.9<br>(7.3%)  | 0.7<br>(7.7%)  | 0.6<br>(8.0%)  | 0.4<br>(8.3%)  |
| Oman         | 1.5<br>(3.1%) | 1.5<br>(2.2%) | 1.5<br>(2.2%) | 1.5<br>(2.2%) | 1.5<br>(2.3%) | 1.5<br>(2.5%) | 1.5<br>(2.8%) | 1.5<br>(3.0%) | 1.5<br>(3.3%) | 1.5<br>(3.7%) | 1.5<br>(4.2%) | 1.5<br>(4.8%) | 1.5<br>(5.5%) | 1.4<br>(6.4%) | 1.3<br>(7.4%) | 1.2<br>(8.7%) | 1.0<br>(9.7%)  | 0.9<br>(10.8%) | 0.7<br>(11.7%) | 0.4<br>(10.8%) |
| Palestine    | 1.3<br>(2.4%) | 1.3<br>(1.9%) | 1.3<br>(1.9%) | 1.3<br>(1.9%) | 1.3<br>(2.0%) | 1.3<br>(2.2%) | 1.3<br>(2.4%) | 1.3<br>(2.6%) | 1.3<br>(2.9%) | 1.3<br>(3.2%) | 1.3<br>(3.6%) | 1.3<br>(4.0%) | 1.3<br>(4.6%) | 1.2<br>(5.2%) | 1.1<br>(5.9%) | 1.0<br>(6.6%) | 0.9<br>(7.3%)  | 0.7<br>(7.8%)  | 0.6<br>(8.0%)  | 0.4<br>(8.5%)  |
| Qatar        | 1.3<br>(2.6%) | 1.3<br>(1.8%) | 1.3<br>(1.8%) | 1.3<br>(1.8%) | 1.3<br>(1.9%) | 1.3<br>(2.1%) | 1.3<br>(2.2%) | 1.3<br>(2.5%) | 1.3<br>(2.7%) | 1.3<br>(3.0%) | 1.3<br>(3.4%) | 1.3<br>(3.8%) | 1.2<br>(4.4%) | 1.2<br>(5.1%) | 1.1<br>(6.0%) | 1.1<br>(7.2%) | 0.9<br>(8.7%)  | 0.8<br>(10.5%) | 0.6<br>(13.0%) | 0.5<br>(13.9%) |
| Saudi Arabia | 1.9<br>(4.1%) | 2.0<br>(2.8%) | 2.0<br>(2.8%) | 2.0<br>(2.8%) | 2.0<br>(3.0%) | 2.0<br>(3.3%) | 2.0<br>(3.6%) | 2.0<br>(3.9%) | 2.0<br>(4.3%) | 2.0<br>(4.8%) | 2.0<br>(5.3%) | 1.9<br>(5.9%) | 1.8<br>(6.6%) | 1.7<br>(7.2%) | 1.6<br>(7.8%) | 1.4<br>(8.4%) | 1.2<br>(8.9%)  | 1.0<br>(9.6%)  | 0.8<br>(10.2%) | 0.6<br>(11.3%) |
| Sudan        | 1.3<br>(2.4%) | 1.3<br>(1.9%) | 1.3<br>(1.9%) | 1.3<br>(1.9%) | 1.3<br>(2.0%) | 1.3<br>(2.2%) | 1.3<br>(2.4%) | 1.3<br>(2.6%) | 1.3<br>(2.9%) | 1.3<br>(3.2%) | 1.3<br>(3.6%) | 1.2<br>(4.0%) | 1.2<br>(4.5%) | 1.1<br>(5.0%) | 1.0<br>(5.5%) | 0.9<br>(6.0%) | 0.8<br>(6.5%)  | 0.7<br>(7.1%)  | 0.5<br>(7.4%)  | 0.4<br>(7.7%)  |
| Syria        | 1.3<br>(2.8%) | 1.4<br>(2.0%) | 1.4<br>(2.0%) | 1.4<br>(2.1%) | 1.4<br>(2.2%) | 1.4<br>(2.4%) | 1.4<br>(2.6%) | 1.4<br>(2.8%) | 1.4<br>(3.1%) | 1.4<br>(3.4%) | 1.4<br>(3.8%) | 1.3<br>(4.2%) | 1.3<br>(4.6%) | 1.2<br>(5.1%) | 1.0<br>(5.6%) | 0.9<br>(6.0%) | 0.8<br>(6.3%)  | 0.6<br>(6.8%)  | 0.4<br>(7.2%)  | 0.3<br>(8.1%)  |
| Tunisia      | 1.2<br>(2.5%) | 1.3<br>(1.7%) | 1.3<br>(1.7%) | 1.3<br>(1.7%) | 1.3<br>(1.8%) | 1.3<br>(2.0%) | 1.3<br>(2.2%) | 1.3<br>(2.4%) | 1.3<br>(2.6%) | 1.3<br>(2.8%) | 1.3<br>(3.1%) | 1.2<br>(3.5%) | 1.2<br>(3.9%) | 1.1<br>(4.4%) | 1.1<br>(4.9%) | 1.0<br>(5.5%) | 0.9<br>(6.1%)  | 0.7<br>(6.6%)  | 0.6<br>(7.2%)  | 0.4<br>(7.7%)  |
| Turkey       | 1.0<br>(2.2%) | 1.1<br>(1.5%) | 1.1<br>(1.5%) | 1.1<br>(1.5%) | 1.1<br>(1.6%) | 1.1<br>(1.7%) | 1.1<br>(1.8%) | 1.1<br>(2.0%) | 1.1<br>(2.2%) | 1.1<br>(2.4%) | 1.1<br>(2.7%) | 1.1<br>(3.0%) | 1.0<br>(3.3%) | 1.0<br>(3.7%) | 0.9<br>(4.2%) | 0.9<br>(4.7%) | 0.8<br>(5.2%)  | 0.7<br>(5.7%)  | 0.6<br>(6.2%)  | 0.4<br>(6.7%)  |
| UAE          | 1.4<br>(3.4%) | 1.5<br>(2.1%) | 1.5<br>(2.1%) | 1.5<br>(2.2%) | 1.5<br>(2.3%) | 1.5<br>(2.5%) | 1.5<br>(2.7%) | 1.5<br>(3.0%) | 1.5<br>(3.3%) | 1.5<br>(3.6%) | 1.5<br>(4.1%) | 1.4<br>(4.6%) | 1.4<br>(5.2%) | 1.3<br>(5.8%) | 1.2<br>(6.5%) | 1.1<br>(7.2%) | 0.9<br>(7.8%)  | 0.8<br>(8.8%)  | 0.7<br>(9.7%)  | 0.5<br>(10.6%) |
| Yemen        | 1.0<br>(2.0%) | 1.1<br>(1.6%) | 1.1<br>(1.6%) | 1.1<br>(1.6%) | 1.1<br>(1.7%) | 1.1<br>(1.9%) | 1.1<br>(2.1%) | 1.1<br>(2.3%) | 1.1<br>(2.5%) | 1.1<br>(2.8%) | 1.1<br>(3.1%) | 1.0<br>(3.5%) | 1.0<br>(3.9%) | 0.9<br>(4.2%) | 0.8<br>(4.6%) | 0.7<br>(5.1%) | 0.6<br>(5.5%)  | 0.5<br>(5.8%)  | 0.4<br>(6.0%)  | 0.3<br>(6.2%)  |
